# Supplementary material for: Connective Tissue Growth Factor Inhibition Enhances Cardiac Repair and Limits Fibrosis After Myocardial Infarction
Source: PubMed Central journal article supplement — JACC Basic Transl Sci. 2019 Feb 25;4(1):83–94. doi: 10.1016/j.jacbts.2018.10.007 (PMC6390503; doi:10.1016/j.jacbts.2018.10.007), 2019-02-25
Supplement: mmc1.pdf [file mmc1.pdf]

# Connective Tissue Growth Factor Inhibition Enhances Cardiac Repair and Limits Fibrosis After Myocardial Infarction

Short title: Antagonizing the function of CTGF in ischemic heart

MD Laura E. Vainio<sup>a,b</sup>, MSc Zoltán Szabó<sup>a,b</sup>, MSc Ruizhu Lin<sup>a</sup>, PhD Johanna Ulvila<sup>a</sup>, MSc Raisa Yrjölä<sup>a</sup>, MSc Tarja Alakoski<sup>a,b</sup>, MD, PhD Jarkko Piuhola<sup>c</sup>, PhD Walter J Koch<sup>d</sup>, MD, PhD Heikki Ruskoaho<sup>a</sup>, PhD Shaun D. Fouse<sup>e</sup>, PhD Todd W. Seeley<sup>e</sup>, MD, PhD Erhe Gao<sup>d</sup>, PhD Pierre Signore<sup>e</sup>, PhD Kenneth E. Lipson<sup>e</sup>, PhD Johanna Magga<sup>a,b</sup>, MD, PhD \*Risto Kerkelä<sup>a,f</sup>

<sup>a</sup>Research Unit of Biomedicine, Department of Pharmacology and Toxicology, University of Oulu, Finland

<sup>b</sup>Biocenter Oulu, University of Oulu, Finland

<sup>c</sup>Division of Cardiology, Department of Internal Medicine, Oulu University Hospital and University of Oulu

<sup>d</sup>Temple University School of Medicine, 3500 N Broad St, Philadelphia, PA, USA

<sup>e</sup>FibroGen, Inc., 409 Illinois St., San Francisco, CA, USA

<sup>f</sup>Medical Research Center Oulu, Oulu University Hospital and University of Oulu

## \*Address for correspondence:

Risto Kerkelä

Research Unit of Biomedicine

University of Oulu

P.O.BOX 5000

FI-90014, Oulu, Finland

E-mail: Risto.Kerkela@oulu.fi

Tel: +358-50-350 3989

## **Supplemental Material**

### **Supplemental Methods**

#### **Study protocol**

To investigate the function of CTGF mAb in cardiac repair, treatment was started 3 days after MI and continued for four days with mice receiving two treatment doses in total. To investigate the efficacy of CTGF mAb during post-MI remodelling, treatment with CTGF mAb or control IgG was started 7 days after MI and continued for 6 weeks with 2 doses per week. Echocardiography analysis at 3 or 7 days after MI, respectively, was used to determine LV ejection fraction and to assess for infarct size. Infarctions were scored from 1 (small) to 4 (expanded). The mice were then divided into treatment groups with equal degree of MI-induced injury in both groups. CTGF mAb (FG-3149, FibroGen, Inc.) and control mouse IgG (FibroGen, Inc.) solutions (1 mg/ml) were administered i.p. (10 mg/kg). In I/R studies, mice were randomized to receive CTGF mAb or IgG vehicle 24h and 1h before operation, and then subjected to I/R injury. An additional group of animals received CTGF mAb only at the time of reperfusion. The animals were observed for 3h or 24h after reperfusion and then subjected to echocardiography analysis and sacrificed.

#### **Mouse myocardial ischemia model**

8-10 week old male C57BL/6 mice were subjected to MI by permanent ligation of the LAD or subjected to I/R injury. C57BL/6NCrl mice were used for 3d + 4d study, and C57BL/6J0laHsd mice for other studies. MI was produced by ligating the LAD with a suture. In the I/R model, a slipknot was released after 30 minutes, allowing reperfusion of the ischemic myocardium as previously described in detail (1), and the mice were observed for up to 24h depending on experimental endpoint. Sham-operated mice were subjected to the same surgical procedure without ligation of the LAD. All operations were performed under isoflurane anaesthesia (Baxter, Vetequip evaporiser, 2% isoflurane with 1 l/min flow of oxygen). Carprofen (Pfizer) 5 mg/kg s.c. (injection volume 0.125-0.15 ml) was administered as pre-operation analgesia and buprenorphine (Orion Pharma) 0.05 mg/kg s.c. (injection volume 0.1-0.3 ml) was administered as operation analgesia. Post-operation dehydration was prevented with s.c. injection of 5% glucose (injection volume 0.5-1.0 ml). All animals were monitored after the surgery and received a dose of buprenorphine (0.05 mg/kg) in the evening of operation day. Another dose of buprenorphine and a dose of carprofen (5mg/kg) were administered the following morning. Afterwards, buprenorphine was administered in drinking water 0.01 mg/ml for two days.

#### **Echocardiography**

Mice were anaesthetized with isoflurane and transthoracic echocardiography was performed by trained sonographer with Vevo 2100 high frequency, high resolution linear array ultrasound system using a MS-

550S transducer (Visual Sonics Vevo 2100, 40 MHz, axial resolution 40  $\mu\text{m}$ , lateral resolution 90  $\mu\text{m}$ ). B-mode, M-mode, transmitral flow - Pulse wave and tissue Doppler images were recorded and carefully analyzed with Vevo Workstation software 1.7 by a blinded observer.

### **Processing of the samples**

In MI studies cardiac tissue was transversally cut into two pieces through the infarcted area with the basal part fixed in phosphate buffered 10% formalin solution and embedded in paraffin. 5  $\mu\text{m}$  thick sections were cut for histological studies (Masson's trichrome, Picrosorus red, CD45 and CD31 stainings). The apical half was stored in  $-80^{\circ}\text{C}$  for further biochemical studies. In I/R studies, the whole heart was sectioned for infarct size measurement with TTC - Evans blue method at 24h after reperfusion. For TUNEL analysis and western blotting analyses following I/R, a separate set of parallel experimental animals were operated and sacrificed at 3h after reperfusion. The apical half of the hearts (LV tissue) was stored in  $-80^{\circ}\text{C}$  to obtain samples for Western blot analyses and the basal half was stored in formalin to be used for TUNEL analysis.

### **Determination of area at risk and infarct sizes**

Infarct size and the size of the area at risk (AR) following I/R were determined as previously described (1). At the end of the 24-h reperfusion period, the mice were reanaesthetized and the ligature around the LAD was retied at the previous ligation site. Following this, 2% Evans blue dye was injected into the aorta and allowed to circulate uniformly in the areas of the heart perfused by the open coronary arteries. The heart was then quickly excised, snap frozen on dry ice and cut into five sections from the apex to the base. Sections were then incubated in 1% triphenyltetrazolium chloride (TTC) (Sigma) solution in PBS and photographed with a Canon EOS 450D digital camera with a 100-mm macro lens. The area not at risk (ANAR; Evans blue-stained area) and the AR (including both the TTC staining-positive [non-infarct, red] and TTC staining-negative [infarct, white] areas) were measured with the Nikon NIS-Elements BR 2.30 program.

### **Quantitative PCR analysis**

Total RNA was extracted from non-ischemic LV tissues with Trizol (Life technologies). cDNA was produced from 500 ng RNA with Transcriptor First-Strand cDNA Synthesis Kit (Roche). RNA levels were measured by real-time quantitative polymerase chain reaction (qPCR) analysis using TaqMan and SYBR Green chemistries on an ABI Prism 7700 Sequence Detection System (Thermo Fisher Scientific). The gene expression data were then normalized to 18S. Primers for qPCR are shown in Table S5.

### **Western blot analysis**

Frozen LV tissues were ground in liquid nitrogen and were dissolved and homogenized in ice-cold lysis buffer containing of 20 mM Tris, (pH 7.5), 10 mM NaCl, 1 mM EDTA, 1 mM EGTA, supplemented with 1 mM  $\beta$ -glycerophosphate, 2 mM dithiothreitol (DTT), 1 mM  $\text{Na}_3\text{VO}_4$ , 10  $\mu\text{g}/\text{mL}$  leupeptin, 10  $\mu\text{g}/\text{mL}$

aprotinin, 2 µg/mL pepstatin, 2 mM benzamidine, 1 mM PMSF and 20 mM NaF. Samples were then centrifuged at 10000x g for 5 min at 4 °C and the supernatant was collected. Protein concentrations were determined by the method of Bradford. Protein extracts were matched for protein concentration and stored denatured in SDS loading buffer at -70 °C. Equal volumes (30 µg) of protein samples were loaded onto 12-14 % SDS-PAGE and transferred to nitrocellulose membranes. Antibodies and their dilutions used were; anti-active JNK antibody (V7932, Promega, 1:3000), SAPK/JNK antibody (#9252, Cell Signaling, 1:1000), Anti-STAT3 (phospho Y705) antibody (ab30646, Abcam, 1:500), Stat3 (79D7) antibody (#4904, Cell Signaling, 1:1000), phospho-p38 MAPK (Thr180/Tyr182) antibody (#9211, Cell Signaling, 1:1000), phospho-p44/42 MAPK (Erk1/2) (Thr202/Tyr204) antibody (#9106, Cell Signaling, 1:1000), phospho-Akt (Ser473) antibody (#9271, Cell Signaling, 1:1000), phospho-PKCα (Ser657/Tyr658) antibody (07-790, Merck, 1:1000), phospho-SMAD2 (Ser465/467) antibody (#3108 Cell Signaling, 1:1000), phospho-SMAD1/5 (Ser463/465) antibody (#9516, Cell Signaling, 1:1000), Anti-FAK (phospho Y397) antibody (ab81298, Abcam, 1:1000), Anti-α-SMA antibody (ab5694, Abcam, 1:2000), Anti-Coll1 antibody (ab34710, Abcam 1:500). Glyceraldehyde-3-Phosphate Dehydrogenase Antibody (MAB374, Merck, 1:100000) or Vinculin antibody (ab18058, Abcam, 1:1000) was used as a loading control. Secondary antibodies were purchased from Life Technologies (Alexa Fluor A11371, A21058 and A21076) and used in the dilution of 1:5000. Antibodies were diluted in Odyssey Blocking Buffer from LI-COR. Protein levels were detected using fluorescence with Odyssey Fc imaging system (LI-COR Biosciences).

## **Histology**

For terminal deoxynucleotidyl transferase-mediated dUTP nick end labeling (TUNEL) assay, we used ApopTag peroxidase in situ apoptosis detection kit (Merck Millipore) according to the manufacturer's instructions. Images were captured with a bright-field Nikon Eclipse 50i microscope (40x objective) equipped with Nikon camera and apoptotic nuclei were quantified. For analysis of cardiomyocyte cross-sectional area cardiac sections were stained with Masson's trichrome, imaged with 20x objective, and size of 50 cardiomyocytes/section was determined. The length of the infarction was determined from Masson's trichrome stained sections with a 1x objective by measuring the length of the infarct in relation to the whole LV circumference. To analyze for the size and number of capillaries, cardiac sections were stained with CD31 (Santa Cruz Biotechnology). Five fields per section were captured with Nikon Eclipse 50i microscope (40x objective) and analyzed with NIS-elements software. To quantify myocardial collagen content, the sections were stained with Picrosirius Red (Direct Red 80, Sigma). The sections were analyzed under the microscope with linear polarized light (Olympus BX51) and images were obtained with a color digital camera (captured with 20x objective, Olympus, DP71). Red and green birefringence of collagen fibers were quantified with Image J software from the infarcted area, peri-infarct zone and remote areas. To assess for infiltration of inflammatory cells, cardiac sections were stained with CD45 antibody (Abcam) and images were captured with fluorescent Nikon Eclipse 80i microscope (40x objective) equipped with Hamamatsu ORCA-flash 4.0 LT camera. CD45 immunofluorescent area was then determined with NIS-elements software.

## **Determination of the expansion index**

The septal thickness, scar thickness and LV area were measured from images of Masson's trichrome stained sections captured with a 1x objective. Endocardial LV chamber area was determined by echocardiography. The expansion index was calculated as the septal thickness/scar thickness  $\times$  chamber area/LV area (2,3).

## **Human cardiac fibroblast culture**

Human cardiac fibroblasts were purchased from ScienCell (Cat. #6300). Cells were seeded on poly-L-Lysine ( $2 \mu\text{g}/\text{cm}^2$ ) coated plate (ScienCell, Cat.#0413), cultured in Dulbecco's Modified Eagle's Medium/Nutrient Mixture F-12 Ham (Sigma, #D8437) with 10% fetal bovine serum (FBS, ScienCell, Cat. No. 0025), 1% fibroblast growth supplement-2 (FGS-2, ScienCell, Cat. No. 2382) and penicillin/streptomycin solution (P/S, ScienCell, Cat. No. 0503). Next day, cells were treated with  $10 \mu\text{g}/\text{ml}$  CTGF mAb (Fibrogen, FG-3149) or control IgG in the presence or absence of  $2 \mu\text{M}$  JNK inhibitor I (Calbiochem/Merck, #420116). After 24h treatment, cells were treated with  $1 \text{ ng}/\text{ml}$  TGF- $\beta$ 1 (Peprotech, #100-21) were indicated and further incubated for 24h. For analysis of collagen production, cells were fixed with 4% PFA and stained using Sirius red/fast green collagen staining kit (Chondrex/Amsbio,#9046) according to manufacturer's instructions. For analysis of fibroblast proliferation, cells were incubated with  $5 \mu\text{M}$  EdU (Click-iT™ EdU Alexa Fluor™ 488 HCS Assay, Thermo Fisher Scientific, C10350). After 3 hours, cells were fixed with 4% PFA for 15 min and EdU incorporation was analyzed according to manufacturer's instructions.

## **References**

1. Gao E, Lei YH, Shang X et al. A Novel and Efficient Model of Coronary Artery Ligation and Myocardial Infarction in the Mouse. *Circ Res* 2010;107:1445-1453.
2. Virag JA, Rolle ML, Reece J, Hardouin S, Feigl EO, Murry CE. Fibroblast growth factor-2 regulates myocardial infarct repair: effects on cell proliferation, scar contraction, and ventricular function. *Am J Pathol* 2007;171:1431-40.
3. Hutchins GM, Bulkley BH. Infarct expansion versus extension: two different complications of acute myocardial infarction. *Am J Cardiol* 1978;41:1127-32.

## Supplemental Tables

**Table S1. Antagonizing the function of CTGF during early LV remodeling (Study II).**

|                     | <b>Sham</b> | <b>MI + IgG</b> | <b>MI + CTGF mAb</b> |
|---------------------|-------------|-----------------|----------------------|
|                     | (n=5)       | (n=7)           | (n=8)                |
| <b>LVID;d (mm)</b>  | 4.01±0.26   | 5.34±0.56 **    | 5.35±0.53 **         |
| <b>LVID;s (mm)</b>  | 3.04±0.37   | 4.89±0.50 ***   | 4.88±0.57 ***        |
| <b>LVPW;d (mm)</b>  | 0.71±0.08   | 0.88±0.10 *     | 0.81±0.06            |
| <b>LVPW;s (mm)</b>  | 0.95±0.09   | 1.03±0.15       | 0.95±0.10            |
| <b>LVVol;d (μl)</b> | 71.1±0.08   | 143±26.9 ***    | 140±29.3 ***         |
| <b>LVVol;s (μl)</b> | 36.9±10.3   | 115±24.6 ***    | 114±28.5 ***         |
| <b>EF%</b>          | 48.8±8.20   | 19.8±3.62 ***   | 19.5±5.03 ***        |
| <b>FS%</b>          | 24.5±5.02   | 9.07±1.73 **    | 8.95±2.38 **         |
| <b>HR (BPM)</b>     | 393±30      | 468±35 *        | 443±30               |
| <b>SV (μl)</b>      | 36.6±4.47   | 28.7±3.75 *     | 26.1±4.93 **         |
| <b>CO (ml/min)</b>  | 14.5±2.69   | 13.4±1.73       | 11.5±2.39            |
| <b>E/E'</b>         | -33.4±10.8  | -60.2±21.4 *    | -31.3±9.29 ##        |
| <b>IVRT (ms)</b>    | 15.8±2.05   | 20.0±4.11       | 23.2±4.30 **         |
| <b>LV mass (mg)</b> | 100±14.5    | 140±31.9 *      | 133±17.9             |

The mice were subjected to experimental myocardial infarction (MI), and one week after surgery mice were randomly divided to two groups receiving either immunoglobulin G (IgG) vehicle or connective tissue growth factor monoclonal antibody (CTGF mAb). Two weeks later mice were subjected to echocardiography analysis. Left ventricular end-diastolic dimension (LVID;d), LV end-systolic dimension (LVID;s), LV end-diastolic posterior wall thickness (LVPW;d), LV end-systolic posterior wall thickness (LVPW;s), LV end-diastolic volume (LVVol;d), LV end-systolic volume (LVVol;s), ejection fraction (EF%), fractional shortening (FS%), heart rate (HR), stroke volume (SV), cardiac output (CO), mitral E/E' ratio (E/E'), isovolumic relaxation time (IVRT) and LV mass were analyzed. Data are presented as mean±SD; \* $P$ <0.05, \*\* $P$ <0.01, \*\*\* $P$ <0.001 versus sham, ## $P$ <0.01 versus MI + IgG.

**Table S2. CTGF mAb protects from adverse post-MI LV remodelling (Study II).**

|                               | <b>Sham</b> | <b>MI + IgG</b> | <b>MI + CTGF mAb</b> |
|-------------------------------|-------------|-----------------|----------------------|
|                               | (n=5)       | (n=7)           | (n=8)                |
| <b>LVID;d (mm)</b>            | 4.07±0.16   | 5.82±0.84 **    | 5.57±0.54 ***        |
| <b>LVID;s (mm)</b>            | 3.00±0.23   | 5.22±0.73 ***   | 5.02±0.56 ***        |
| <b>LVPW;d (mm)</b>            | 0.69±0.06   | 0.97±0.16 **    | 0.86±0.13            |
| <b>LVPW;s (mm)</b>            | 1.00±0.06   | 1.08±0.16       | 0.98±0.21            |
| <b>LVVol;d (µl)</b>           | 73.0±6.78   | 175±54.3 **     | 156±33.7 ***         |
| <b>LVVol;s (µl)</b>           | 35.1±6.63   | 135±42.1 **     | 123±31.3 ***         |
| <b>EF%</b>                    | 52.1±6.00   | 22.2±2.82 ***   | 21.2±4.94 ***        |
| <b>FS%</b>                    | 26.4±3.79   | 10.4±1.46 ***   | 9.82±2.43 ***        |
| <b>HR (BPM)</b>               | 392±24      | 487±40 *        | 449±48               |
| <b>SV (µl)</b>                | 36.7±4.32   | 41.3±13.1       | 33.5±7.49            |
| <b>CO (ml/min)</b>            | 14.4±2.37   | 20.0±6.18       | 15.1±3.94            |
| <b>E/E'</b>                   | -34.7±10.2  | -30.0±6.54      | -31.6±16.0           |
| <b>IVRT (ms)</b>              | 14.2±0.85   | 24.6±1.62 **    | 26.2±7.57 *          |
| <b>LAA;d (mm<sup>2</sup>)</b> | 4.14±0.67   | 5.82±1.31 *     | 4.63±0.53            |
| <b>LV mass (mg)</b>           | 87.5±4.16   | 247±60.5 ***    | 162±32.2 * ##        |
| <b>HW/BW (mg/g)</b>           | 4.94±0.27   | 7.61±0.85 ***   | 6.60±0.60 *** #      |

The mice were subjected to myocardial infarction (MI) and one week after surgery randomly divided to receive either IgG vehicle or CTGF mAb for 6 weeks, and subjected to echocardiography analysis. LV end-diastolic dimension (LVID;d), LV end-systolic dimension (LVID;s), LV end-diastolic posterior wall thickness (LVPW;d), LV end-systolic posterior wall thickness (LVPW;s), LV end-diastolic volume (LVVol;d), LV end-systolic volume (LVVol;s), ejection fraction (EF%), fractional shortening (FS%), heart rate (HR), stroke volume (SV), cardiac output (CO), mitral E/E' ratio (E/E'), isovolumic relaxation time (IVRT), left atrial end-diastolic area (LAA;d), LV mass and heart weight versus body weight (HW/BW) were analyzed. Data are presented as mean±SD; \**P*<0.05, \*\**P*<0.01, \*\*\**P*<0.001 versus sham, #*P*<0.05, ##*P*<0.01 versus MI + IgG.

**Table S3. RNAseq analysis of CTGF mAb responsive genes in the LV at 7 weeks after MI (Study II, n=72).**

Transcripts that were significantly altered by CTGF mAb compared to IgG treatment were identified as described in the supplemental materials. Fold-change (Fc) and parametric p-values are provided for the indicated comparisons. P-values were calculated without assuming equal variance or adjusting for multiple comparisons. Fc values meeting cut-offs for a >1.5-fold increase or decrease in relative expression are indicated in red or blue, respectively. P-values <0.05 are indicated in red.

| Gene ID     | Gene Symbol   | Description                                               | MI CTGF mAb vs MI IgG |          | MI IgG vs Sham |          | MI CTGF mAb vs Sham |          |
|-------------|---------------|-----------------------------------------------------------|-----------------------|----------|----------------|----------|---------------------|----------|
|             |               |                                                           | Fc                    | p        | Fc             | p        | Fc                  | p        |
| 77127       | A930001A20Rik | RIKEN cDNA A930001A20 gene                                | 7.44                  | 1.54E-03 | 1.20           | 5.78E-01 | 8.93                | 3.53E-03 |
| 19799       | Rn4.5s        | 4.5S RNA                                                  | 6.92                  | 4.28E-03 | 1.17           | 6.78E-01 | 8.11                | 3.69E-05 |
| 19018       | Scand1        | SCAN domain-containing 1                                  | 3.93                  | 4.15E-04 | 1.38           | 2.90E-01 | 5.43                | 3.82E-03 |
| 319587      | 4930539J05Rik | RIKEN cDNA 4930539J05 gene                                | 3.63                  | 2.31E-04 | -1.11          | 6.50E-01 | 3.27                | 3.40E-03 |
| 18188       | Nrtn          | neurturin                                                 | 3.23                  | 1.91E-03 | 2.66           | 7.67E-02 | 8.60                | 1.29E-02 |
| 170942.chrY | Erdrl         | erythroid differentiation regulator 1                     | 2.96                  | 2.77E-03 | -1.02          | 8.81E-01 | 2.91                | 2.00E-03 |
| 73990       | 4930455C13Rik | RIKEN cDNA 4930455C13 gene                                | 2.81                  | 4.22E-02 | -2.71          | 4.68E-02 | 1.04                | 7.13E-01 |
| 14761       | Gpr27         | G protein-coupled receptor 27                             | 2.52                  | 1.28E-05 | 1.07           | 1.51E-01 | 2.71                | 6.32E-05 |
| 244216      | Zfp771        | zinc finger protein 771                                   | 2.35                  | 6.21E-04 | 1.52           | 6.53E-02 | 3.58                | 1.11E-03 |
| 73951       | 4930413G21Rik | RIKEN cDNA 4930413G21 gene                                | 2.27                  | 4.00E-03 | -1.01          | 9.31E-01 | 2.25                | 3.57E-03 |
| 231646      | Myo1h         | myosin 1H                                                 | 2.26                  | 2.74E-02 | -2.28          | 2.73E-02 | -1.01               | 9.33E-01 |
| 75135       | 4930526I15Rik | RIKEN cDNA 4930526I15 gene                                | 2.02                  | 1.96E-05 | 1.17           | 1.81E-01 | 2.38                | 1.01E-03 |
| 246735      | AY074887      | cDNA sequence AY074887                                    | 1.91                  | 1.21E-02 | 1.06           | 3.74E-01 | 2.03                | 1.13E-02 |
| 664968      | Tmem238       | transmembrane protein 238                                 | 1.90                  | 1.99E-02 | -1.18          | 4.73E-01 | 1.61                | 1.19E-01 |
| 214616      | Spata511      | spermatogenesis associated 5-like 1                       | 1.89                  | 5.78E-03 | 1.10           | 6.57E-01 | 2.09                | 2.20E-02 |
| 209047      | Gipc3         | GIPC PDZ domain containing family, member 3               | 1.87                  | 1.34E-02 | -1.39          | 1.13E-01 | 1.34                | 8.53E-02 |
| 68195       | Rnaset2b      | ribonuclease T2B                                          | 1.80                  | 3.64E-03 | -1.26          | 1.71E-01 | 1.43                | 6.64E-02 |
| 72500       | Ier5l         | immediate early response 5-like                           | 1.78                  | 1.77E-03 | 2.01           | 1.50E-03 | 3.57                | 6.72E-05 |
| 68431       | Fbxl15        | F-box and leucine-rich repeat protein 15                  | 1.77                  | 6.32E-03 | 1.19           | 2.41E-01 | 2.10                | 4.46E-04 |
| 67445       | C1qtnf4       | C1q and tumor necrosis factor related protein 4           | 1.77                  | 1.23E-02 | -1.46          | 2.27E-01 | 1.21                | 5.15E-01 |
| 13804       | Endog         | endonuclease G                                            | 1.76                  | 1.22E-03 | 1.00           | 9.65E-01 | 1.76                | 1.24E-03 |
| 16478       | Jund          | Jun proto-oncogene related gene d                         | 1.74                  | 5.65E-05 | 1.52           | 1.25E-03 | 2.65                | 1.49E-05 |
| 13864       | Nr2f6         | nuclear receptor subfamily 2, group F, member 6           | 1.73                  | 5.69E-04 | 1.08           | 3.90E-01 | 1.86                | 1.96E-05 |
| 68458       | Ppp1r14a      | protein phosphatase 1, regulatory (inhibitor) subunit 14A | 1.72                  | 5.41E-03 | -1.39          | 2.89E-01 | 1.24                | 4.52E-01 |
| 12608       | Cebpb         | CCAAT/enhancer binding protein (C/EBP), beta              | 1.70                  | 1.33E-02 | 2.42           | 2.58E-02 | 4.12                | 1.42E-02 |
| 668158      | Ccdc85c       | coiled-coil domain containing 85C                         | 1.70                  | 4.02E-04 | 1.01           | 8.91E-01 | 1.72                | 1.50E-04 |
| 319192      | Hist2h2aa2    | histone cluster 2, H2aa2                                  | 1.70                  | 2.06E-03 | 1.39           | 5.85E-02 | 2.36                | 7.42E-03 |
| 21407       | Tcf15         | transcription factor 15                                   | 1.68                  | 1.35E-02 | 1.06           | 6.68E-01 | 1.78                | 1.64E-03 |
| 232440      | H2afj         | H2A histone family, member J                              | 1.67                  | 6.58E-03 | 1.37           | 4.82E-02 | 2.28                | 2.27E-04 |
| 16373       | Irx3          | Iroquois related homeobox 3 (Drosophila)                  | 1.65                  | 1.48E-02 | 1.25           | 3.27E-01 | 2.06                | 2.29E-02 |
| 20677       | Sox4          | SRY-box containing gene 4                                 | 1.63                  | 3.10E-02 | -1.04          | 8.68E-01 | 1.57                | 1.23E-01 |
| 77134       | Hnrmpa0       | heterogeneous nuclear ribonucleoprotein A0                | 1.62                  | 2.97E-04 | -1.05          | 7.03E-01 | 1.55                | 2.39E-02 |
| 54352       | Irx5          | Iroquois related homeobox 5 (Drosophila)                  | 1.62                  | 1.20E-02 | 1.18           | 4.62E-01 | 1.91                | 3.79E-02 |
| 18091       | Nkx2-5        | NK2 transcription factor related, locus 5 (Drosophila)    | 1.61                  | 6.54E-04 | 1.03           | 7.38E-01 | 1.65                | 5.72E-05 |
| 66832       | Rsph3a        | radial spoke 3A homolog (Chlamydomonas)                   | 1.61                  | 3.49E-03 | 1.58           | 3.00E-03 | 2.55                | 1.36E-04 |
| 69372       | Mocs3         | molybdenum cofactor synthesis 3                           | 1.60                  | 6.71E-04 | 1.18           | 3.38E-01 | 1.89                | 2.22E-02 |



|        |               |                                                                                   |       |          |       |          |       |          |
|--------|---------------|-----------------------------------------------------------------------------------|-------|----------|-------|----------|-------|----------|
| 11606  | Agt           | angiotensinogen (serpin peptidase inhibitor, clade A, member 8)                   | 1,60  | 4,43E-02 | -1,24 | 3,46E-01 | 1,29  | 3,37E-01 |
| 319180 | Hist1h2bf     | histone cluster 1, H2bf                                                           | 1,60  | 1,28E-02 | 1,25  | 2,57E-01 | 2,00  | 1,38E-02 |
| 14173  | Fgf2          | fibroblast growth factor 2                                                        | 1,59  | 8,60E-03 | -1,02 | 8,86E-01 | 1,56  | 3,98E-03 |
| 66391  | 2310061J03Rik | RIKEN cDNA 2310061J03 gene                                                        | 1,58  | 3,81E-02 | 1,46  | 6,91E-02 | 2,30  | 4,11E-04 |
| 67078  | Pgp           | phosphoglycolate phosphatase                                                      | 1,57  | 4,65E-04 | 1,22  | 1,45E-01 | 1,92  | 5,69E-03 |
| 232969 | Zfp428        | zinc finger protein 428                                                           | 1,55  | 5,47E-03 | 1,12  | 4,76E-01 | 1,74  | 2,07E-02 |
| 70316  | Ndubf1        | NADH dehydrogenase (ubiquinone) 1, alpha/beta subcomplex, 1                       | 1,54  | 1,77E-03 | -1,15 | 1,27E-01 | 1,34  | 1,39E-03 |
| 68490  | Zfp579        | zinc finger protein 579                                                           | 1,54  | 1,11E-02 | -1,21 | 1,80E-01 | 1,27  | 3,59E-02 |
| 56222  | Cited4        | Cbp/p300-interacting transactivator, with Glu/Asp-rich carboxy-terminal domain, 4 | 1,54  | 4,26E-02 | 1,05  | 6,32E-01 | 1,61  | 3,10E-02 |
| 78108  | 4930414L22Rik | RIKEN cDNA 4930414L22 gene                                                        | 1,53  | 1,74E-03 | 1,09  | 1,65E-01 | 1,66  | 1,24E-03 |
| 15166  | Hcn2          | hyperpolarization-activated, cyclic nucleotide-gated K+ 2                         | 1,52  | 2,63E-03 | 1,07  | 1,95E-01 | 1,63  | 1,52E-03 |
| 68992  | Zfp580        | zinc finger protein 580                                                           | 1,52  | 2,25E-02 | -1,02 | 8,65E-01 | 1,48  | 2,11E-02 |
| 66929  | Asf1b         | ASF1 anti-silencing function 1 homolog B (S. cerevisiae)                          | -1,51 | 1,78E-02 | 1,25  | 1,73E-01 | -1,21 | 2,23E-01 |
| 24047  | Ccl19         | chemokine (C-C motif) ligand 19                                                   | -1,53 | 3,77E-02 | 2,05  | 1,12E-03 | 1,34  | 1,01E-01 |
| 56312  | Nupr1         | nuclear protein 1                                                                 | -1,53 | 2,42E-02 | 5,83  | 2,45E-05 | 3,81  | 1,13E-04 |
| 12442  | Ccnb2         | cyclin B2                                                                         | -1,53 | 1,12E-02 | 1,71  | 7,04E-03 | 1,11  | 1,54E-01 |
| 14229  | Fkbp5         | FK506 binding protein 5                                                           | -1,53 | 8,66E-03 | 2,51  | 1,26E-04 | 1,63  | 3,17E-03 |
| 50530  | Mfap5         | microfibrillar associated protein 5                                               | -1,55 | 6,79E-03 | 5,98  | 7,49E-06 | 3,85  | 5,76E-04 |
| 210622 | Pamr1         | peptidase domain containing associated with muscle regeneration 1                 | -1,56 | 1,04E-02 | 10,82 | 2,26E-05 | 6,92  | 1,51E-05 |
| 239559 | A4galt        | alpha 1,4-galactosyltransferase                                                   | -1,58 | 1,94E-04 | 2,04  | 4,00E-02 | 1,29  | 2,65E-01 |
| 140494 | Atp6v0a4      | ATPase, H+ transporting, lysosomal V0 subunit A4                                  | -1,59 | 1,64E-02 | 1,63  | 1,43E-02 | 1,02  | 1,04E-01 |
| 18787  | Serpine1      | serine (or cysteine) peptidase inhibitor, clade E, member 1                       | -1,61 | 9,68E-03 | 5,43  | 1,39E-05 | 3,36  | 3,29E-05 |
| 11752  | Anxa8         | annexin A8                                                                        | -1,63 | 1,28E-02 | 1,98  | 5,03E-03 | 1,22  | 7,09E-02 |
| 67606  | Fibin         | fin bud initiation factor homolog (zebrafish)                                     | -1,66 | 1,86E-03 | 8,72  | 8,70E-07 | 5,26  | 4,13E-06 |
| 235416 | Lman1l        | lectin, mannose-binding 1 like                                                    | -1,66 | 1,81E-02 | 2,19  | 3,80E-03 | 1,32  | 6,42E-02 |
| 68713  | Ifitm1        | interferon induced transmembrane protein 1                                        | -1,68 | 1,88E-02 | 1,25  | 4,01E-01 | -1,35 | 2,91E-01 |
| 72293  | Nkd2          | naked cuticle 2 homolog (Drosophila)                                              | -1,73 | 1,26E-02 | 3,47  | 5,56E-04 | 2,01  | 4,10E-03 |
| 21828  | Thbs4         | thrombospondin 4                                                                  | -1,78 | 3,88E-02 | 34,16 | 7,63E-06 | 19,15 | 1,02E-04 |
| 20750  | Spp1          | secreted phosphoprotein 1                                                         | -1,79 | 4,10E-02 | 2,51  | 4,81E-03 | 1,40  | 1,23E-01 |
| 268709 | Fam107a       | family with sequence similarity 107, member A                                     | -1,81 | 4,05E-03 | 2,00  | 4,19E-03 | 1,10  | 2,60E-01 |
| 13371  | Dio2          | deiodinase, iodothyronine, type II                                                | -1,83 | 4,67E-03 | 6,15  | 1,08E-04 | 3,35  | 2,48E-04 |
| 50706  | Postn         | periostin, osteoblast specific factor                                             | -1,85 | 5,80E-03 | 14,34 | 3,84E-06 | 7,76  | 1,16E-06 |
| 22152  | Tubb3         | tubulin, beta 3 class III                                                         | -1,90 | 1,98E-02 | 3,30  | 1,29E-03 | 1,73  | 2,86E-02 |
| 17750  | Mt2           | metallothionein 2                                                                 | -1,92 | 4,05E-02 | 4,75  | 1,20E-03 | 2,47  | 5,55E-03 |
| 654812 | Angptl7       | angiopoietin-like 7                                                               | -1,96 | 4,39E-02 | 17,00 | 1,43E-04 | 8,65  | 4,20E-04 |
| 68588  | Cthrc1        | collagen triple helix repeat containing 1                                         | -2,25 | 6,75E-03 | 3,36  | 1,75E-03 | 1,49  | 5,96E-02 |

**Table S4. CTGF mAb has no effect on ischemia-reperfusion injury (Study III).**

|                     | <b>Sham</b> | <b>I/R + IgG</b> | <b>I/R + CTGF mAb</b> | <b>I/R + CTGF mAb at reperfusion</b> |
|---------------------|-------------|------------------|-----------------------|--------------------------------------|
|                     | (n=5)       | (n=15)           | (n=16)                | (n=12)                               |
| <b>LVID;d (mm)</b>  | 3.97±0.20   | 4.18±0.37        | 4.16±0.37             | 4.07±0.36                            |
| <b>LVID;s (mm)</b>  | 2.85±0.22   | 3.36±0.50        | 3.40±0.46             | 3.25±0.38                            |
| <b>LVPW;d (mm)</b>  | 0.76±0.06   | 0.75±0.11        | 0.72±0.13             | 0.73±0.09                            |
| <b>LVPW;s (mm)</b>  | 1.06±0.17   | 0.91±0.17        | 0.87±0.13             | 0.92±0.12                            |
| <b>LVVol;d (μl)</b> | 69.1±8.01   | 78.7±17.2        | 77.5±15.6             | 73.7±15.1                            |
| <b>LVVol;s (μl)</b> | 31.1±5.89   | 47.5±17.6        | 48.7±14.9             | 43.3±11.5                            |
| <b>EF%</b>          | 55.2±4.41   | 41.1±10.2 *      | 38.5±8.86 *           | 41.0±12.11 *                         |
| <b>FS%</b>          | 28.3±2.77   | 20.1±5.77 *      | 18.5±4.83 *           | 20.1±6.87 *                          |
| <b>HR (BPM)</b>     | 417±26      | 462±37           | 472±45                | 437±50                               |
| <b>SV (ml)</b>      | 39.1±4.66   | 32.5±5.47        | 29.2±4.62             | 30.8±11.3                            |
| <b>CO (ml/min)</b>  | 16.2±1.54   | 15.0±2.35        | 13.7±2.28             | 13.4±4.97                            |
| <b>LV mass (mg)</b> | 107±8.07    | 117±29.4         | 110±27.8              | 121±26.6                             |

The mice were subjected to ischemia-reperfusion injury (I/R) and treated with immunoglobulin G (IgG) vehicle or connective tissue growth factor monoclonal antibody (CTGF mAb). After 24 hours mice were subjected to echocardiography analysis. Left ventricular end-diastolic dimension (LVID;d), LV end-systolic dimension (LVID;s), LV end-diastolic posterior wall thickness (LVPW;d), LV end-systolic posterior wall thickness (LVPW;s), LV end-diastolic volume (LVVol;d), LV end-systolic volume (LVVol;s), ejection fraction (EF%), fractional shortening (FS%), heart rate (HR), stroke volume (SV), cardiac output (CO) and LV mass were analyzed. Data are presented as mean±SD; \**P*<0.05 versus sham.

**Table S5. Oligonucleotide primer sequences used for mRNA quantitation by qPCR.**

Fluorogenic probe, sense and antisense nucleotide primer sequences for real-time quantitative polymerase chain reaction (qPCR) analysis used by TaqMan chemistry and sense and antisense primer sequences used by SYBR Green chemistry.

| <b>Gene</b>                   | <b>Fluorogenic Probe (5'-[FAM...TAMRA])</b> | <b>Sequences</b>          |                           |
|-------------------------------|---------------------------------------------|---------------------------|---------------------------|
|                               |                                             | <b>Sense (5'-...)</b>     | <b>Antisense (5'-...)</b> |
| <b>CCL2</b>                   | CACTCACCTGCTGCTACTCATTCACTGGC               | CTCAGCCAGATGCAGTTAATGC    | AGCCGACTCATTGGGATCAT      |
| <b>IL1a</b>                   |                                             | CGAAGACTACAGTTCTGCCATT    | GACGTTTCAGAGTTCTCAGAG     |
| <b>IL1b</b>                   |                                             | TCTTTGAAGTTGACGGACCC      | TGAGTGATACTGCCTGCCTG      |
| <b>IL6</b>                    | CAGAATTGCCATTGCACAACCTTTTTCTCA              | ACATGTTCTCTGGGAAATCGTGGAA | TGCATCATCGTTGTTTCATACAA   |
| <b>IL18</b>                   |                                             | GACTCTTGCGTCAACTTCAAGG    | CAGGCTGTCTTTTGCAACGA      |
| <b>TNF<math>\alpha</math></b> | TGCTCCTCACCCACACCGTCAGC                     | GACAAGGCTGCCCGACTA        | CTCCTGGTATGAGATAGCAAATC   |
| <b>18S TaqMan</b>             | CCTGGTGGTGCCCTTCCGTCA                       | TGGTTGCAAAGCTGAAACTTAAAG  | AGTCAAATTAAGCCGCAGGC      |
| <b>18S SYBRGreen</b>          |                                             | CGCCGCTAGAGGTGAAATTC      | CCAGTCGGCATCGTTTATGG      |

## Figure S1

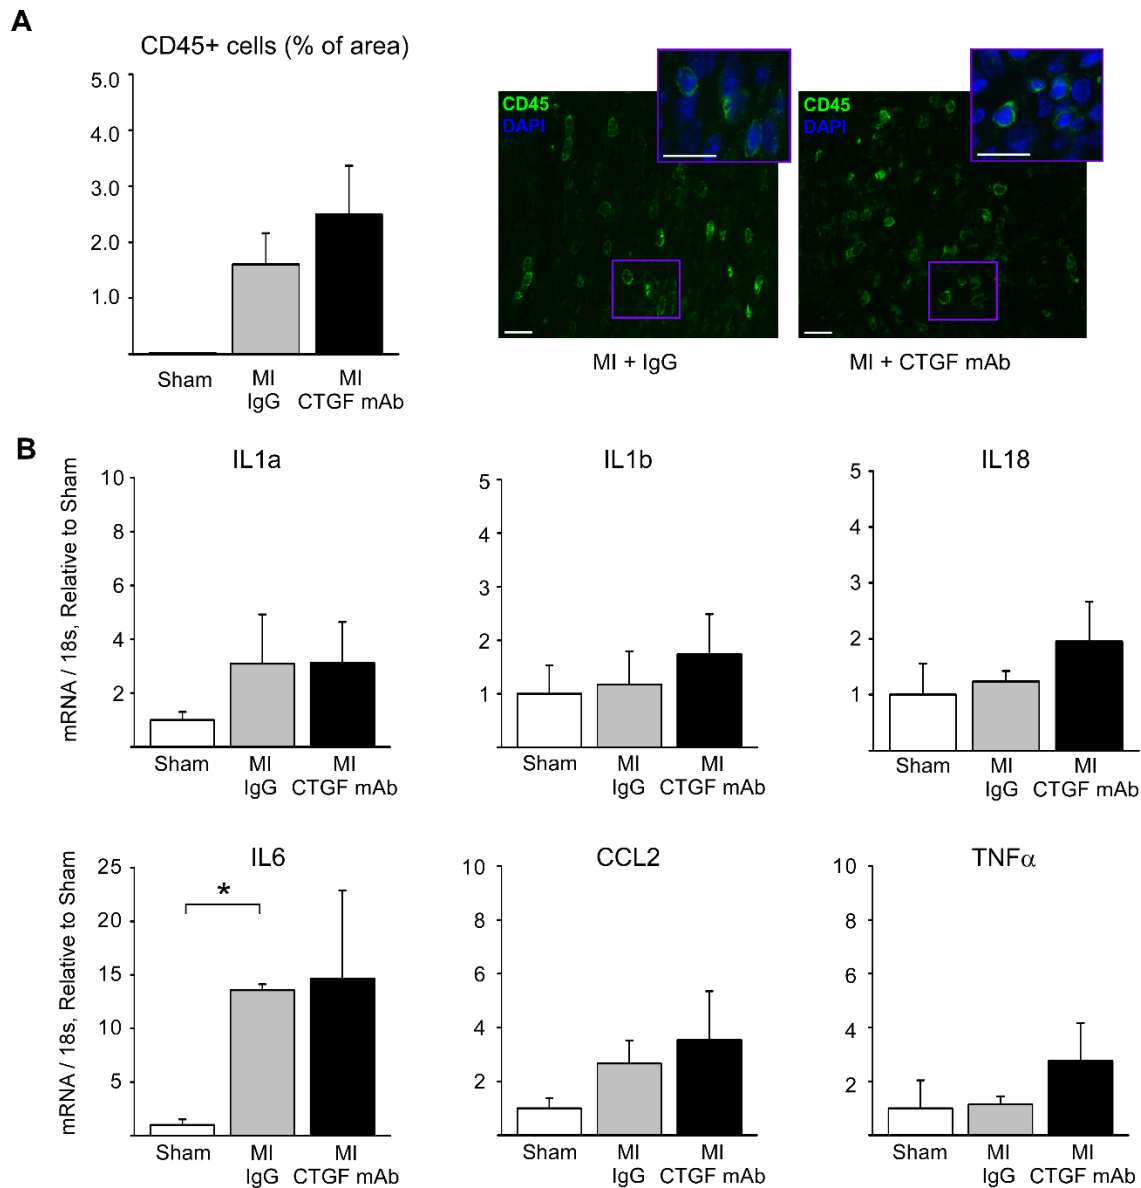

**Figure S1. Antagonizing the function of CTGF during infarct repair.** Mice were subjected to myocardial infarction (MI) and three days after surgery randomly divided to receive either immunoglobulin G (IgG) vehicle or CTGF monoclonal antibody (CTGF mAb) for four days. Four days later cardiac tissue was collected for histological analysis and RNA isolation. A, Analysis for percentage of area of CD45-positive cells in the infarct area and representative micrographs. There was no fluorescence in Sham sections, value <0.02% of area. Scale bar 20  $\mu$ m. B, Quantitative polymerase chain reaction analysis of inflammatory marker genes. Shown is analysis for mRNA levels of interleukins 1a, 1b, 18, 6 (IL-1a, IL-1b, IL-18, IL-6), chemokine (C-C motif) ligand 2 (CCL2) and tumor necrosis factor  $\alpha$  (TNF $\alpha$ ). Data are presented as mean $\pm$ SD; \* $P$ <0.05. Number of animals was Sham (n=4), IgG (n=5) and CTGF mAb (n=8).

**Figure S2**

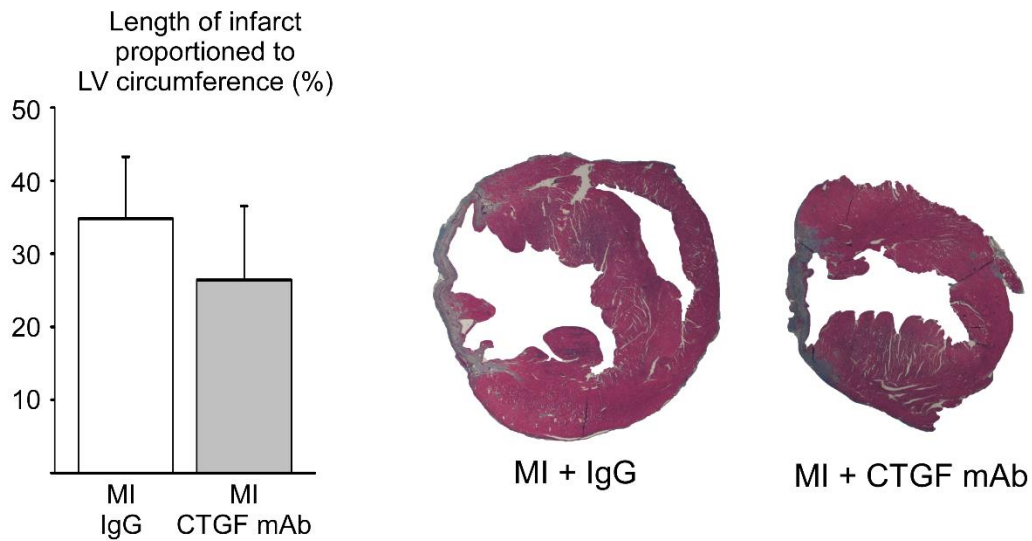

**Figure S2. Effect of CTGF mAb on post-infarction cardiac hypertrophy.** Mice were subjected to experimental myocardial infarction (MI), and one week after surgery mice were randomly divided to two groups receiving either immunoglobulin G (IgG) vehicle or connective tissue growth factor monoclonal antibody (CTGF mAb). Six weeks later cardiac tissue was collected for histological analysis. Shown is determination of length of infarction proportioned to LV circumference and representative figures of Masson stained transversal LV sections. Data are presented as mean±SD. Number of animals was MI+IgG (n=5) and MI+CTGF mAb (n=8).

**Figure S3**

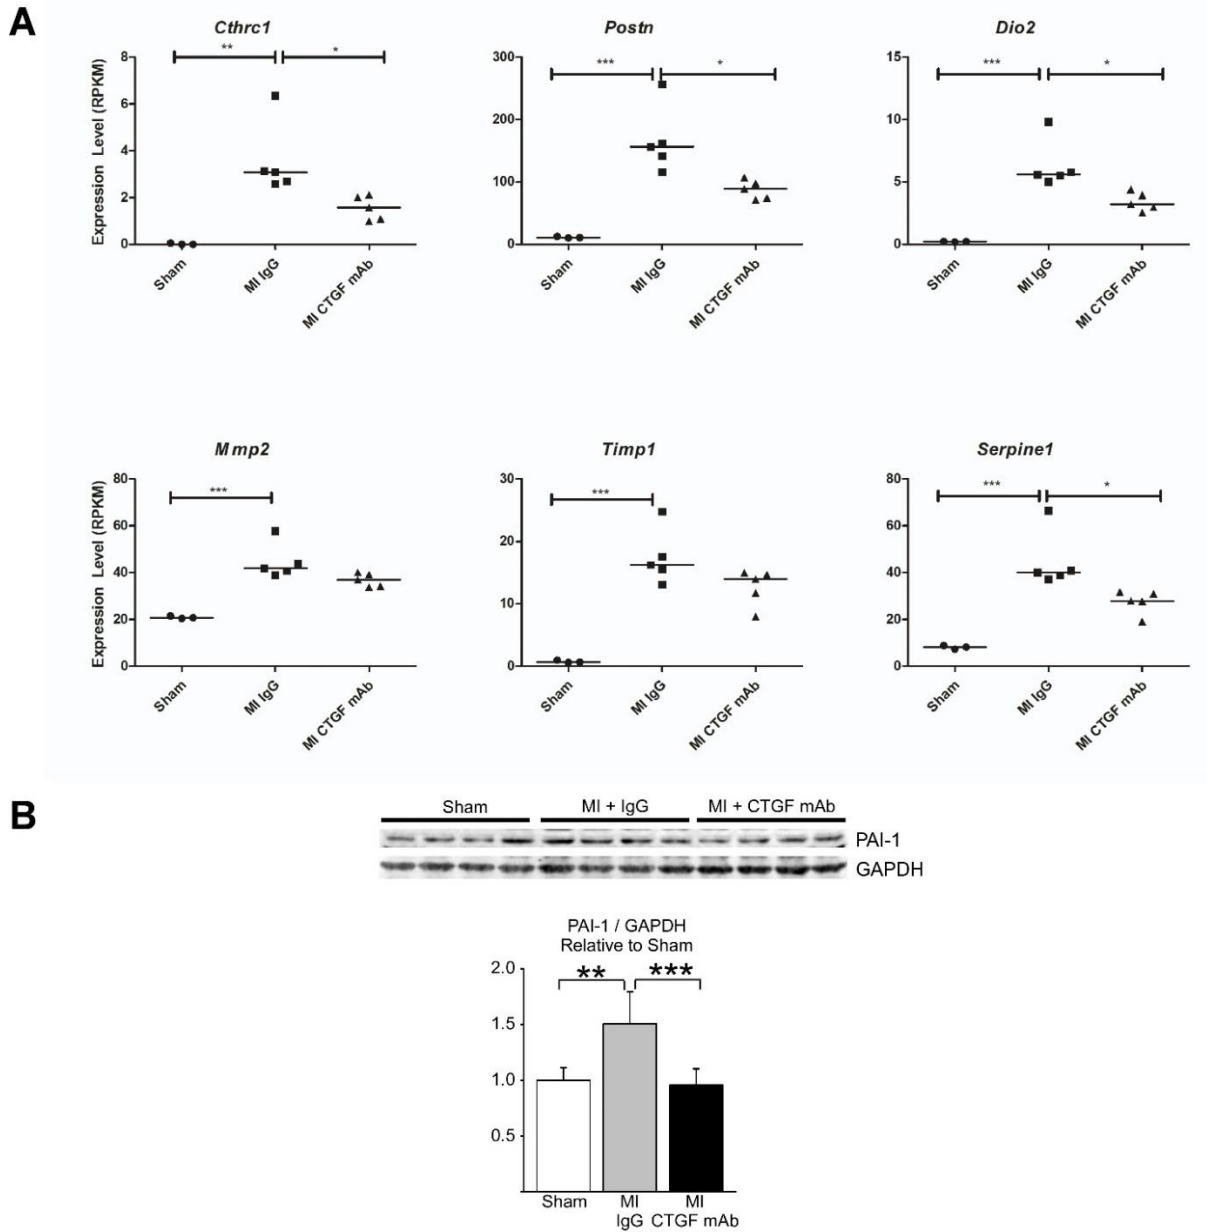

**Figure S3. Effect of CTGF mAb on MI –induced expression of inflammatory/fibrotic genes.** Mice were subjected to myocardial infarction (MI), and one week after surgery mice were randomly divided to receive either immunoglobulin G (IgG) vehicle or connective tissue growth factor monoclonal antibody (CTGF mAb). Six weeks later mice cardiac tissue from remote left ventricle was collected for biochemical analyses. A, Shown is analysis for mRNA levels of *Cthrc1* (Collagen triple helix repeat containing 1), *Periostin*, *Dio2* (Iodothyronine deiodinase 2), *MMP2* (matrix metalloprotease 2), *TIMP1* (tissue inhibitor of metalloproteinase 1) and *Serpine1* (plasminogen activator inhibitor 1, PAI-1). mRNA expression data (RPKM) data presented as individual animal results, with a line indicating the median. B, Western blot analysis of expression of PAI-1. Data are presented as mean±SD. \* $P < 0.05$ , \*\* $P < 0.01$  \*\*\* $P < 0.001$ .

**Figure S4**

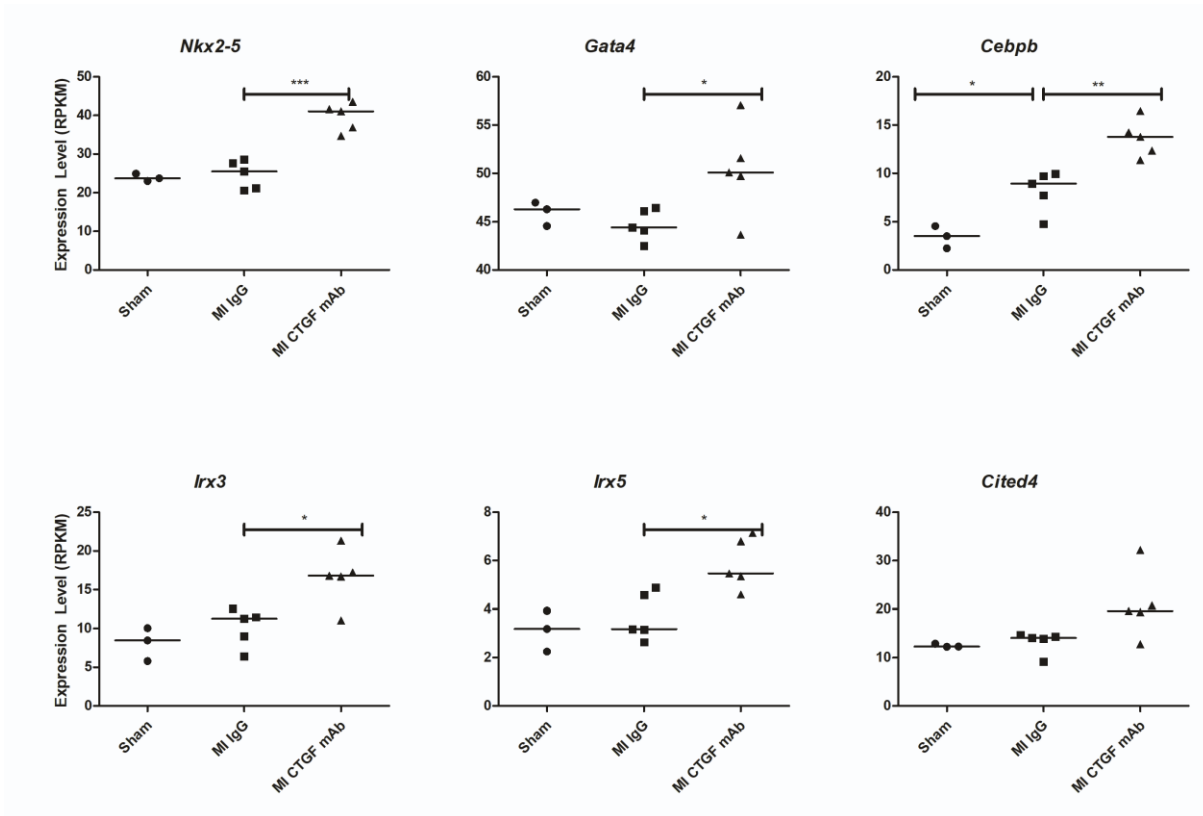

**Figure S4. Effect of CTGF mAb expression of cardiac developmental/repair genes in MI hearts.** Mice were subjected to experimental myocardial infarction (MI), and one week after surgery mice were randomly divided to two groups receiving either immunoglobulin G (IgG) vehicle or connective tissue growth factor monoclonal antibody (CTGF mAb). Six weeks later mice cardiac tissue was collected for RNAseq analysis. Shown is mRNA analysis for *Nkx2-5*, *Gata4*, *Cebpb* (CCAAT Enhancer Binding Protein Beta), *Irx3* (Iroquois homeobox 3), *Irx5* and *Cited4*. mRNA expression data (RPKM) data presented as individual animal results, with a line indicating the median. \* $P < 0.05$ , \*\* $P < 0.01$ , \*\*\* $P < 0.001$ .

## Data Set 1. RNAseq analysis of significantly altered genes in the LV at 7 weeks after MI (n=1196)

Transcripts that were significantly altered by MI were identified as described in the supplemental materials. Fold-change (Fc) and parametric p-values are provided for the indicated comparisons. P-values were calculated without assuming equal variance or adjusting for multiple comparisons. Fc values meeting cut-offs for a >2-fold increase or decrease in relative expression for MI vs Sham are indicated in red or blue, respectively. P-values <0.01 are indicated in red.

| <i>Gene ID</i> | <i>Gene Symbol</i> | <i>Description</i>                                                    | <b>MI IgG vs Sham</b> |          | <b>MI CTGF mAb vs Sham</b> |          |
|----------------|--------------------|-----------------------------------------------------------------------|-----------------------|----------|----------------------------|----------|
|                |                    |                                                                       | <i>Fc</i>             | <i>p</i> | <i>Fc</i>                  | <i>p</i> |
| 12845          | Comp               | cartilage oligomeric matrix protein                                   | 41,15                 | 3,45E-05 | 35,08                      | 9,53E-05 |
| 21828          | Thbs4              | thrombospondin 4                                                      | 34,16                 | 7,63E-06 | 19,15                      | 1,02E-04 |
| 214425         | Cilp               | cartilage intermediate layer protein, nucleotide pyrophosphohydrolase | 28,33                 | 3,40E-06 | 19,01                      | 3,63E-06 |
| 230899         | Nppa               | natriuretic peptide type A                                            | 21,63                 | 2,13E-06 | 15,80                      | 4,41E-05 |
| 14264          | Fmod               | fibromodulin                                                          | 21,33                 | 5,54E-05 | 13,64                      | 3,46E-04 |
| 21857          | Timp1              | tissue inhibitor of metalloproteinase 1                               | 17,03                 | 1,12E-05 | 12,34                      | 2,86E-05 |
| 654812         | Angptl7            | angiopoietin-like 7                                                   | 17,00                 | 1,43E-04 | 8,65                       | 4,20E-04 |
| 16997          | Ltbp2              | latent transforming growth factor beta binding protein 2              | 16,93                 | 7,14E-05 | 10,67                      | 1,14E-04 |
| 76293          | Mfap4              | microfibrillar-associated protein 4                                   | 15,21                 | 2,00E-06 | 11,79                      | 4,73E-06 |
| 20319          | Sfrp2              | secreted frizzled-related protein 2                                   | 14,78                 | 6,98E-05 | 16,45                      | 9,91E-05 |
| 50706          | Postn              | periostin, osteoblast specific factor                                 | 14,34                 | 3,84E-06 | 7,76                       | 1,16E-06 |
| 140781         | Myh7               | myosin, heavy polypeptide 7, cardiac muscle, beta                     | 13,50                 | 8,02E-07 | 9,35                       | 6,21E-06 |
| 22403          | Wisp2              | WNT1 inducible signaling pathway protein 2                            | 13,21                 | 5,86E-05 | 11,62                      | 3,39E-06 |
| 223272         | Itgbl1             | integrin, beta-like 1                                                 | 10,89                 | 1,90E-05 | 8,71                       | 4,94E-07 |
| 210622         | Pamr1              | peptidase domain containing associated with muscle regeneration 1     | 10,82                 | 2,26E-05 | 6,92                       | 1,51E-05 |
| 50781          | Dkk3               | dickkopf homolog 3 ( <i>Xenopus laevis</i> )                          | 9,81                  | 7,98E-05 | 6,53                       | 3,03E-04 |
| 78896          | 1500015O10Rik      | RIKEN cDNA 1500015O10 gene                                            | 9,15                  | 3,17E-04 | 5,47                       | 8,36E-03 |
| 11459          | Acta1              | actin, alpha 1, skeletal muscle                                       | 8,82                  | 1,40E-03 | 9,94                       | 9,44E-04 |
| 67606          | Fibin              | fin bud initiation factor homolog (zebrafish)                         | 8,72                  | 8,70E-07 | 5,26                       | 4,13E-06 |
| 20753          | Sprr1a             | small proline-rich protein 1A                                         | 8,28                  | 5,83E-04 | 6,97                       | 2,32E-03 |
| 107765         | Ankrd1             | ankyrin repeat domain 1 (cardiac muscle)                              | 7,97                  | 9,39E-07 | 6,06                       | 3,23E-06 |
| 14219          | Ctgf               | connective tissue growth factor                                       | 7,60                  | 2,83E-06 | 5,69                       | 1,37E-05 |
| 77794          | Adamtsl2           | ADAMTS-like 2                                                         | 7,42                  | 3,23E-04 | 6,44                       | 2,73E-03 |
| 23886          | Gdf15              | growth differentiation factor 15                                      | 7,08                  | 8,06E-05 | 5,61                       | 3,06E-03 |
| 20716          | Serpina3n          | serine (or cysteine) peptidase inhibitor, clade A, member 3N          | 6,64                  | 2,82E-04 | 4,17                       | 1,25E-05 |
| 12837          | Col8a1             | collagen, type VIII, alpha 1                                          | 6,28                  | 2,48E-05 | 4,40                       | 1,79E-07 |
| 20307          | Ccl8               | chemokine (C-C motif) ligand 8                                        | 6,20                  | 9,39E-06 | 3,38                       | 2,85E-02 |
| 16854          | Lgals3             | lectin, galactose binding, soluble 3                                  | 6,20                  | 3,09E-04 | 4,58                       | 7,56E-04 |
| 13371          | Dio2               | deiodinase, iodothyronine, type II                                    | 6,15                  | 1,08E-04 | 3,35                       | 2,48E-04 |
| 231633         | Tmem119            | transmembrane protein 119                                             | 6,03                  | 5,90E-05 | 4,65                       | 5,99E-05 |
| 13170          | Dbp                | D site albumin promoter binding protein                               | 6,02                  | 2,67E-04 | 7,27                       | 1,14E-04 |
| 50530          | Mfap5              | microfibrillar associated protein 5                                   | 5,98                  | 7,49E-06 | 3,85                       | 5,76E-04 |
| 56312          | Nupr1              | nuclear protein 1                                                     | 5,83                  | 2,45E-05 | 3,81                       | 1,13E-04 |
| 18627          | Per2               | period homolog 2 ( <i>Drosophila</i> )                                | 5,64                  | 6,51E-04 | 3,62                       | 8,61E-03 |
| 21825          | Thbs1              | thrombospondin 1                                                      | 5,56                  | 1,43E-03 | 3,79                       | 2,48E-03 |
| 18787          | Serpine1           | serine (or cysteine) peptidase inhibitor, clade E, member 1           | 5,43                  | 1,39E-05 | 3,36                       | 3,29E-05 |
| 55987          | Cpxm2              | carboxypeptidase X 2 (M14 family)                                     | 5,37                  | 5,24E-04 | 5,64                       | 1,09E-05 |
| 17313          | Mgp                | matrix Gla protein                                                    | 5,30                  | 7,05E-07 | 4,06                       | 1,58E-06 |
| 12931          | Crlf1              | cytokine receptor-like factor 1                                       | 5,20                  | 4,41E-04 | 3,67                       | 1,24E-04 |
| 12268          | C4b                | complement component 4B (Chido blood group)                           | 5,19                  | 5,30E-04 | 4,62                       | 7,56E-04 |
| 68797          | Pdgfrr1            | platelet-derived growth factor receptor-like                          | 5,14                  | 3,12E-04 | 3,56                       | 3,44E-04 |
| 252837         | Ccr11              | chemokine (C-C motif) receptor-like 1                                 | 5,06                  | 1,62E-04 | 3,50                       | 6,88E-04 |
| 20378          | Frzb               | frizzled-related protein                                              | 4,96                  | 5,21E-05 | 3,95                       | 1,18E-04 |
| 17750          | Mt2                | metallothionein 2                                                     | 4,75                  | 1,20E-03 | 2,47                       | 5,55E-03 |
| 16012          | Igfbp6             | insulin-like growth factor binding protein 6                          | 4,64                  | 3,74E-08 | 3,76                       | 1,82E-06 |
| 329941         | Col8a2             | collagen, type VIII, alpha 2                                          | 4,63                  | 1,92E-03 | 3,21                       | 8,53E-03 |
| 11833          | Aqp8               | aquaporin 8                                                           | 4,50                  | 1,68E-03 | 5,36                       | 5,41E-05 |
| 12111          | Bgn                | biglycan                                                              | 4,41                  | 2,20E-05 | 3,46                       | 4,39E-05 |
| 17285          | Meox1              | mesenchyme homeobox 1                                                 | 4,36                  | 8,90E-05 | 3,39                       | 3,01E-05 |
| 229599         | Gm129              | predicted gene 129                                                    | 4,35                  | 2,48E-03 | 3,70                       | 1,07E-02 |
| 11898          | Ass1               | argininosuccinate synthetase 1                                        | 4,28                  | 4,35E-05 | 3,45                       | 4,36E-05 |
| 19223          | Ptgis              | prostaglandin I2 (prostacyclin) synthase                              | 4,26                  | 1,73E-05 | 3,45                       | 7,09E-04 |



|           |          |                                                                                                |      |          |      |          |
|-----------|----------|------------------------------------------------------------------------------------------------|------|----------|------|----------|
| 12818     | Col14a1  | collagen, type XIV, alpha 1                                                                    | 4,19 | 1,34E-04 | 3,47 | 1,42E-05 |
| 16948     | Lox      | lysyl oxidase                                                                                  | 4,19 | 2,59E-03 | 3,45 | 1,15E-03 |
| 107581    | Col16a1  | collagen, type XVI, alpha 1                                                                    | 4,14 | 1,40E-04 | 2,91 | 6,06E-04 |
| 20317     | Serpinf1 | serine (or cysteine) peptidase inhibitor, clade F, member 1                                    | 4,09 | 1,12E-05 | 3,16 | 1,01E-05 |
| 20293     | Ccl12    | chemokine (C-C motif) ligand 12                                                                | 4,01 | 3,79E-04 | 2,89 | 2,50E-04 |
| 26561     | Mmp23    | matrix metalloproteinase 23                                                                    | 3,83 | 1,93E-03 | 3,25 | 1,94E-03 |
| 19782     | Rmrp     | RNA component of mitochondrial RNAase P                                                        | 3,79 | 5,92E-02 | 5,38 | 4,35E-02 |
| 13730     | Emp1     | epithelial membrane protein 1                                                                  | 3,73 | 1,24E-05 | 2,75 | 6,66E-04 |
| 11815     | Apod     | apolipoprotein D                                                                               | 3,72 | 1,65E-03 | 3,06 | 6,65E-03 |
| 59095     | Fxyd6    | FXDY domain-containing ion transport regulator 6                                               | 3,69 | 7,60E-05 | 3,10 | 2,07E-04 |
| 85029     | Rpph1    | ribonuclease P RNA component H1                                                                | 3,65 | 6,35E-02 | 3,80 | 4,44E-02 |
| 74116     | Pi16     | peptidase inhibitor 16                                                                         | 3,60 | 1,27E-05 | 2,86 | 4,05E-04 |
| 50490     | Nox4     | NADPH oxidase 4                                                                                | 3,57 | 5,58E-04 | 2,31 | 3,80E-03 |
| 64817     | Svep1    | sushi, von Willebrand factor type A, EGF and pentraxin domain containing 1                     | 3,56 | 9,05E-04 | 3,03 | 1,10E-06 |
| 14314     | Fstl1    | folliculin-like 1                                                                              | 3,54 | 1,31E-04 | 2,77 | 2,38E-03 |
| 19659     | Rbp1     | retinol binding protein 1, cellular                                                            | 3,51 | 5,92E-05 | 2,91 | 1,28E-04 |
| 16803     | Lbp      | lipopolysaccharide binding protein                                                             | 3,51 | 8,13E-05 | 2,91 | 1,07E-03 |
| 100861531 | Rn45s    | 45S pre-ribosomal RNA                                                                          | 3,49 | 1,64E-03 | 4,00 | 4,66E-02 |
| 72293     | Nkd2     | naked cuticle 2 homolog (Drosophila)                                                           | 3,47 | 5,56E-04 | 2,01 | 4,10E-03 |
| 18605     | Enpp1    | ectonucleotide pyrophosphatase/phosphodiesterase 1                                             | 3,44 | 1,32E-04 | 2,63 | 1,89E-07 |
| 18158     | Nppb     | natriuretic peptide type B                                                                     | 3,42 | 5,16E-03 | 2,73 | 7,81E-03 |
| 269855    | Ssc5d    | scavenger receptor cysteine rich domain containing (5 domains)                                 | 3,39 | 2,34E-05 | 2,42 | 2,95E-05 |
| 68588     | Cthrc1   | collagen triple helix repeat containing 1                                                      | 3,36 | 1,75E-03 | 1,49 | 5,96E-02 |
| 18783     | Pla2g4a  | phospholipase A2, group IVA (cytosolic, calcium-dependent)                                     | 3,34 | 6,26E-05 | 2,37 | 3,28E-04 |
| 320712    | Abi3bp   | ABI gene family, member 3 (NESH) binding protein                                               | 3,32 | 4,35E-04 | 2,67 | 1,88E-03 |
| 22223     | Uchl1    | ubiquitin carboxy-terminal hydrolase L1                                                        | 3,32 | 7,10E-05 | 2,57 | 3,56E-05 |
| 22152     | Tubb3    | tubulin, beta 3 class III                                                                      | 3,30 | 1,29E-03 | 1,73 | 2,86E-02 |
| 12879     | Cys1     | cystin 1                                                                                       | 3,29 | 2,19E-03 | 2,56 | 1,97E-02 |
| 21809     | Tgfb3    | transforming growth factor, beta 3                                                             | 3,27 | 1,02E-04 | 2,53 | 2,30E-04 |
| 13038     | Ctsk     | cathepsin K                                                                                    | 3,26 | 1,55E-04 | 2,37 | 5,65E-04 |
| 12364     | Casp12   | caspase 12                                                                                     | 3,24 | 2,10E-03 | 2,42 | 1,58E-02 |
| 83433     | Trem2    | triggering receptor expressed on myeloid cells 2                                               | 3,23 | 3,64E-03 | 2,79 | 1,98E-03 |
| 66197     | Cks2     | CDC28 protein kinase regulatory subunit 2                                                      | 3,21 | 2,28E-03 | 2,68 | 4,39E-03 |
| 83554     | Fstl3    | folliculin-like 3                                                                              | 3,20 | 2,43E-04 | 3,14 | 3,11E-04 |
| 17133     | Maff     | v-maf musculoaponeurotic fibrosarcoma oncogene family, protein F (avian)                       | 3,20 | 1,00E-03 | 2,58 | 2,06E-03 |
| 13616     | Edn3     | endothelin 3                                                                                   | 3,20 | 1,01E-04 | 3,29 | 9,72E-04 |
| 17965     | Nbl1     | neuroblastoma, suppression of tumorigenicity 1                                                 | 3,15 | 2,47E-04 | 2,39 | 3,16E-04 |
| 14190     | Fgl2     | fibrinogen-like protein 2                                                                      | 3,09 | 3,91E-04 | 2,69 | 2,24E-03 |
| 240725    | Sulf1    | sulfatase 1                                                                                    | 3,06 | 3,92E-05 | 2,36 | 1,97E-03 |
| 329065    | Scd4     | stearoyl-coenzyme A desaturase 4                                                               | 3,05 | 1,10E-02 | 4,60 | 5,44E-03 |
| 330723    | Htra4    | HtrA serine peptidase 4                                                                        | 3,05 | 8,90E-04 | 2,13 | 2,56E-04 |
| 20377     | Sfrp1    | secreted frizzled-related protein 1                                                            | 3,04 | 3,52E-03 | 2,53 | 5,50E-03 |
| 209378    | Itih5    | inter-alpha (globulin) inhibitor H5                                                            | 3,04 | 1,07E-04 | 2,33 | 1,79E-03 |
| 12832     | Col5a2   | collagen, type V, alpha 2                                                                      | 3,03 | 3,74E-04 | 2,24 | 2,88E-04 |
| 17242     | Mdk      | midkine                                                                                        | 2,99 | 2,18E-03 | 2,59 | 1,84E-03 |
| 72269     | Cda      | cytidine deaminase                                                                             | 2,98 | 1,18E-03 | 1,99 | 3,50E-02 |
| 66695     | Aspn     | asporin                                                                                        | 2,98 | 2,50E-04 | 2,11 | 3,41E-03 |
| 14726     | Pdpm     | podoplanin                                                                                     | 2,96 | 1,16E-04 | 2,46 | 2,98E-04 |
| 217430    | Pqlc3    | PQ loop repeat containing                                                                      | 2,95 | 9,78E-03 | 2,01 | 4,05E-02 |
| 12816     | Col12a1  | collagen, type XII, alpha 1                                                                    | 2,94 | 2,24E-03 | 1,75 | 3,64E-02 |
| 11421     | Ace      | angiotensin I converting enzyme (peptidyl-dipeptidase A) 1                                     | 2,93 | 2,75E-04 | 2,34 | 6,38E-08 |
| 55991     | Panx1    | pannexin 1                                                                                     | 2,92 | 1,73E-04 | 2,02 | 5,78E-04 |
| 194231    | Cnksr1   | connector enhancer of kinase suppressor of Ras 1                                               | 2,92 | 6,09E-03 | 2,41 | 5,17E-03 |
| 216725    | Adamts2  | a disintegrin-like and metalloproteinase (reprolysin type) with thrombospondin type 1 motif, 2 | 2,88 | 3,24E-04 | 2,46 | 8,03E-05 |
| 21808     | Tgfb2    | transforming growth factor, beta 2                                                             | 2,86 | 1,14E-04 | 2,42 | 9,96E-04 |
| 381175    | Ccdc68   | coiled-coil domain containing 68                                                               | 2,85 | 8,93E-04 | 2,59 | 9,58E-04 |
| 56320     | Dbn1     | drebrin 1                                                                                      | 2,85 | 5,88E-05 | 2,31 | 1,20E-04 |
| 12332     | Capg     | capping protein (actin filament), gelsolin-like                                                | 2,83 | 1,95E-04 | 2,22 | 2,72E-03 |
| 13448     | Dok1     | docking protein 1                                                                              | 2,81 | 1,67E-03 | 2,46 | 2,72E-03 |
| 13008     | Csrp2    | cysteine and glycine-rich protein 2                                                            | 2,77 | 2,37E-04 | 2,40 | 6,70E-04 |
| 12628     | Cfh      | complement component factor h                                                                  | 2,77 | 2,62E-05 | 2,28 | 7,02E-05 |
| 21827     | Thbs3    | thrombospondin 3                                                                               | 2,76 | 2,52E-04 | 2,27 | 9,11E-04 |
| 13190     | Dct      | dopachrome tautomerase                                                                         | 2,75 | 2,16E-04 | 2,32 | 1,63E-03 |
| 76933     | Ifi2712a | interferon, alpha-inducible protein 27 like 2A                                                 | 2,74 | 5,73E-05 | 1,98 | 1,06E-02 |
| 213019    | Pdlim2   | PDZ and LIM domain 2                                                                           | 2,74 | 7,75E-05 | 2,38 | 8,75E-05 |
| 12143     | Blk      | B lymphoid kinase                                                                              | 2,73 | 1,04E-05 | 2,65 | 9,32E-04 |
| 68792     | Srpx2    | sushi-repeat-containing protein, X-linked 2                                                    | 2,73 | 3,01E-04 | 2,27 | 6,10E-05 |
| 17926     | Myoc     | myocilin                                                                                       | 2,72 | 6,16E-04 | 2,26 | 2,27E-03 |

|           |               |                                                                                                              |      |          |      |          |
|-----------|---------------|--------------------------------------------------------------------------------------------------------------|------|----------|------|----------|
| 14747     | Cmklr1        | chemokine-like receptor 1                                                                                    | 2,71 | 2,16E-04 | 2,20 | 7,89E-04 |
| 69217     | Plekha4       | pleckstrin homology domain containing, family A (phosphoinositide binding specific) member 4                 | 2,70 | 1,54E-04 | 2,11 | 2,14E-04 |
| 13056     | Cyb561        | cytochrome b-561                                                                                             | 2,69 | 1,93E-05 | 2,03 | 3,11E-04 |
| 19242     | Ptn           | pleiotrophin                                                                                                 | 2,69 | 5,91E-04 | 2,25 | 8,53E-03 |
| 16950     | Lox13         | lysyl oxidase-like 3                                                                                         | 2,69 | 1,48E-03 | 2,06 | 5,59E-03 |
| 12609     | Cebpd         | CCAAT/enhancer binding protein (C/EBP), delta                                                                | 2,68 | 3,14E-02 | 3,33 | 1,95E-02 |
| 29817     | Igfbp7        | insulin-like growth factor binding protein 7                                                                 | 2,67 | 1,02E-04 | 2,44 | 2,35E-03 |
| 16952     | Anxa1         | annexin A1                                                                                                   | 2,66 | 1,43E-04 | 2,02 | 5,44E-03 |
| 18188     | Nrtn          | neurturin                                                                                                    | 2,66 | 7,67E-02 | 8,60 | 1,29E-02 |
| 11513     | Adcy7         | adenylate cyclase 7                                                                                          | 2,66 | 1,50E-04 | 2,15 | 5,69E-05 |
| 18829     | Ccl21a        | chemokine (C-C motif) ligand 21A (serine)                                                                    | 2,65 | 6,26E-03 | 2,66 | 6,32E-03 |
| 69288     | Rhobtb1       | Rho-related BTB domain containing 1                                                                          | 2,64 | 1,87E-03 | 1,92 | 2,15E-02 |
| 14205     | Figf          | c-fos induced growth factor                                                                                  | 2,63 | 3,53E-03 | 2,36 | 1,78E-03 |
| 17174     | Masp1         | mannan-binding lectin serine peptidase 1                                                                     | 2,62 | 1,35E-05 | 2,29 | 4,70E-05 |
| 68852     | Lrrn4cl       | LRRN4 C-terminal like                                                                                        | 2,62 | 4,45E-04 | 1,95 | 2,59E-03 |
| 96875     | Prg4          | proteoglycan 4 (megakaryocyte stimulating factor, articular superficial zone protein)                        | 2,62 | 2,24E-04 | 1,85 | 2,23E-03 |
| 13180     | Pcbd1         | pterin 4 alpha carbinolamine dehydratase/dimerization cofactor of hepatocyte nuclear factor 1 alpha (TCF1) 1 | 2,61 | 2,96E-03 | 3,01 | 1,06E-03 |
| 77552     | Shisa4        | shisa homolog 4 (Xenopus laevis)                                                                             | 2,61 | 7,27E-03 | 2,58 | 7,68E-03 |
| 667370    | I830012O16Rik | RIKEN cDNA I830012O16 gene                                                                                   | 2,60 | 2,73E-03 | 1,84 | 9,41E-03 |
| 26968     | Islr          | immunoglobulin superfamily containing leucine-rich repeat                                                    | 2,60 | 2,92E-04 | 2,23 | 4,75E-05 |
| 545366    | Cfhr2         | complement factor H-related 2                                                                                | 2,59 | 1,06E-04 | 2,49 | 2,12E-04 |
| 68774     | Ms4a6d        | membrane-spanning 4-domains, subfamily A, member 6D                                                          | 2,59 | 1,45E-03 | 1,86 | 9,49E-03 |
| 99543     | Olfml3        | olfactomedin-like 3                                                                                          | 2,59 | 1,75E-05 | 2,11 | 8,24E-05 |
| 116847    | Prelp         | proline arginine-rich end leucine-rich repeat                                                                | 2,58 | 9,74E-04 | 2,28 | 3,69E-04 |
| 12843     | Colla2        | collagen, type I, alpha 2                                                                                    | 2,58 | 6,09E-04 | 2,11 | 7,05E-05 |
| 330188    | Ccdc63        | coiled-coil domain containing 63                                                                             | 2,57 | 2,64E-03 | 2,53 | 1,03E-03 |
| 16949     | Lox11         | lysyl oxidase-like 1                                                                                         | 2,56 | 3,87E-04 | 2,65 | 5,94E-05 |
| 18628     | Per3          | period homolog 3 (Drosophila)                                                                                | 2,56 | 2,99E-03 | 2,18 | 2,37E-02 |
| 67896     | Ccdc80        | coiled-coil domain containing 80                                                                             | 2,56 | 1,55E-05 | 2,06 | 2,98E-07 |
| 22352     | Vim           | vimentin                                                                                                     | 2,56 | 1,51E-03 | 2,02 | 1,44E-02 |
| 100504346 | Gm13304       | predicted gene 13304                                                                                         | 2,55 | 1,11E-02 | 2,45 | 1,26E-02 |
| 18113     | Nnmt          | nicotinamide N-methyltransferase                                                                             | 2,54 | 1,44E-05 | 2,25 | 4,09E-04 |
| 14268     | Fn1           | fibronectin 1                                                                                                | 2,54 | 9,23E-04 | 2,00 | 2,81E-04 |
| 18301     | Fxyd5         | FXYP domain-containing ion transport regulator 5                                                             | 2,53 | 1,52E-03 | 1,83 | 1,87E-02 |
| 50784     | Ppap2c        | phosphatidic acid phosphatase type 2C                                                                        | 2,52 | 1,50E-04 | 2,83 | 1,45E-05 |
| 77125     | Il33          | interleukin 33                                                                                               | 2,52 | 2,02E-03 | 1,87 | 7,89E-03 |
| 20750     | Spp1          | secreted phosphoprotein 1                                                                                    | 2,51 | 4,81E-03 | 1,40 | 1,23E-01 |
| 109828    | C7            | complement component 7                                                                                       | 2,51 | 1,78E-03 | 2,09 | 7,93E-03 |
| 12159     | Bmp4          | bone morphogenetic protein 4                                                                                 | 2,51 | 9,70E-04 | 2,12 | 2,83E-03 |
| 14229     | Fkbp5         | FK506 binding protein 5                                                                                      | 2,51 | 1,26E-04 | 1,63 | 3,17E-03 |
| 19275     | Ptpn          | protein tyrosine phosphatase, receptor type, N                                                               | 2,50 | 1,56E-04 | 2,31 | 1,78E-04 |
| 11668     | Aldh1a1       | aldehyde dehydrogenase family 1, subfamily A1                                                                | 2,50 | 5,90E-03 | 1,91 | 1,09E-04 |
| 27984     | Efh2          | EF hand domain containing 2                                                                                  | 2,49 | 1,08E-04 | 2,31 | 2,54E-04 |
| 104156    | Etv5          | ets variant gene 5                                                                                           | 2,46 | 1,65E-04 | 2,19 | 2,80E-03 |
| 100034251 | Wfdc17        | WAP four-disulfide core domain 17                                                                            | 2,46 | 8,04E-03 | 2,01 | 2,08E-02 |
| 60363     | Cldn15        | claudin 15                                                                                                   | 2,44 | 2,18E-04 | 2,18 | 1,38E-02 |
| 13003     | Vcan          | versican                                                                                                     | 2,44 | 4,41E-04 | 1,84 | 7,48E-03 |
| 52331     | Stbd1         | starch binding domain 1                                                                                      | 2,44 | 6,37E-03 | 1,77 | 3,39E-02 |
| 214403    | Gm4788        | predicted gene 4788                                                                                          | 2,43 | 2,28E-04 | 2,06 | 4,63E-04 |
| 109225    | Ms4a7         | membrane-spanning 4-domains, subfamily A, member 7                                                           | 2,43 | 1,75E-04 | 2,07 | 2,57E-04 |
| 14187     | Akr1b8        | aldo-keto reductase family 1, member B8                                                                      | 2,43 | 3,17E-04 | 1,84 | 2,32E-03 |
| 233199    | Mybpc2        | myosin binding protein C, fast-type                                                                          | 2,43 | 1,47E-02 | 1,99 | 1,08E-02 |
| 12608     | Cebpb         | CCAAT/enhancer binding protein (C/EBP), beta                                                                 | 2,42 | 2,58E-02 | 4,12 | 1,42E-02 |
| 20135     | Rrm2          | ribonucleotide reductase M2                                                                                  | 2,42 | 7,78E-03 | 2,34 | 7,92E-03 |
| 14962     | Cfb           | complement factor B                                                                                          | 2,41 | 2,86E-03 | 1,98 | 1,34E-02 |
| 232313    | Gxyt2         | glucoside xylosyltransferase 2                                                                               | 2,40 | 5,21E-03 | 2,04 | 5,60E-03 |
| 64540     | Tspan4        | tetraspanin 4                                                                                                | 2,38 | 5,86E-04 | 1,93 | 1,64E-03 |
| 74257     | Tspan17       | tetraspanin 17                                                                                               | 2,38 | 1,79E-03 | 2,24 | 2,55E-03 |
| 114886    | Cygb          | cytoglobin                                                                                                   | 2,37 | 6,94E-05 | 2,06 | 1,46E-04 |
| 629059    | Fam124a       | family with sequence similarity 124, member A                                                                | 2,37 | 9,56E-05 | 2,01 | 2,59E-04 |
| 241431    | Xirp2         | xin actin-binding repeat containing 2                                                                        | 2,37 | 6,40E-06 | 1,86 | 5,38E-03 |
| 15937     | Ier3          | immediate early response 3                                                                                   | 2,37 | 1,30E-03 | 2,04 | 3,25E-03 |
| 11522     | Adh1          | alcohol dehydrogenase 1 (class I)                                                                            | 2,34 | 1,40E-03 | 1,54 | 4,67E-02 |
| 74761     | Mxra8         | matrix-remodelling associated 8                                                                              | 2,33 | 1,75E-04 | 1,96 | 2,96E-04 |
| 27280     | Phlda3        | pleckstrin homology-like domain, family A, member 3                                                          | 2,33 | 2,35E-04 | 2,39 | 3,90E-04 |
| 12842     | Col1a1        | collagen, type I, alpha 1                                                                                    | 2,32 | 9,55E-04 | 2,03 | 2,64E-04 |
| 54519     | Apbb1ip       | amyloid beta (A4) precursor protein-binding, family B, member 1 interacting protein                          | 2,32 | 1,38E-02 | 2,20 | 2,03E-02 |

|        |               |                                                                                                 |      |          |      |          |
|--------|---------------|-------------------------------------------------------------------------------------------------|------|----------|------|----------|
| 170761 | Pdzd3         | PDZ domain containing 3                                                                         | 2,32 | 3,53E-02 | 2,19 | 3,37E-02 |
| 226421 | 5430435G22Rik | RIKEN cDNA 5430435G22 gene                                                                      | 2,31 | 1,87E-03 | 1,71 | 1,65E-05 |
| 21664  | Phlda1        | pleckstrin homology-like domain, family A, member 1                                             | 2,30 | 1,93E-03 | 2,77 | 1,99E-04 |
| 103511 | Fam26e        | family with sequence similarity 26, member E                                                    | 2,30 | 1,52E-03 | 1,76 | 2,39E-03 |
| 80891  | Fcrls         | Fc receptor-like S, scavenger receptor                                                          | 2,30 | 3,15E-04 | 1,79 | 1,52E-03 |
| 140497 | AF251705      | cDNA sequence AF251705                                                                          | 2,29 | 2,79E-02 | 1,84 | 3,67E-02 |
| 76477  | Pcolce2       | procollagen C-endopeptidase enhancer 2                                                          | 2,29 | 6,67E-05 | 2,12 | 1,67E-04 |
| 102436 | Lars2         | leucyl-tRNA synthetase, mitochondrial                                                           | 2,28 | 1,87E-02 | 2,75 | 8,86E-02 |
| 27279  | Tnfrsf12a     | tumor necrosis factor receptor superfamily, member 12a                                          | 2,28 | 5,08E-03 | 2,08 | 8,18E-03 |
| 11568  | Aebp1         | AE binding protein 1                                                                            | 2,27 | 1,58E-03 | 2,18 | 6,88E-05 |
| 14115  | Fbln2         | fibulin 2                                                                                       | 2,26 | 5,93E-04 | 1,98 | 5,81E-05 |
| 20256  | Clec11a       | C-type lectin domain family 11, member a                                                        | 2,26 | 5,75E-03 | 1,78 | 4,83E-02 |
| 56277  | Tmem45a       | transmembrane protein 45a                                                                       | 2,26 | 7,55E-03 | 1,82 | 2,41E-02 |
| 109323 | C1qtnf7       | C1q and tumor necrosis factor related protein 7                                                 | 2,26 | 5,36E-04 | 1,92 | 6,49E-04 |
| 14794  | Spnb2         | splA/ryanodine receptor domain and SOCS box containing 2                                        | 2,25 | 2,07E-04 | 1,85 | 7,82E-03 |
| 69480  | Ttc9          | tetratricopeptide repeat domain 9                                                               | 2,25 | 1,48E-03 | 1,72 | 3,58E-02 |
| 103988 | Gck           | glucokinase                                                                                     | 2,25 | 4,82E-02 | 2,07 | 5,48E-02 |
| 21859  | Timp3         | tissue inhibitor of metalloproteinase 3                                                         | 2,23 | 5,82E-05 | 1,72 | 4,16E-03 |
| 15368  | Hmox1         | heme oxygenase (decycling) 1                                                                    | 2,23 | 3,13E-04 | 1,88 | 2,57E-03 |
| 21685  | Tef           | thyrotroph embryonic factor                                                                     | 2,22 | 9,74E-04 | 1,92 | 8,30E-03 |
| 268860 | Abat          | 4-aminobutyrate aminotransferase                                                                | 2,21 | 1,18E-05 | 2,24 | 6,07E-05 |
| 66058  | Tmem176a      | transmembrane protein 176A                                                                      | 2,20 | 7,86E-05 | 1,86 | 1,60E-03 |
| 68760  | Synpo2l       | synaptopodin 2-like                                                                             | 2,20 | 1,51E-04 | 1,88 | 2,06E-03 |
| 235416 | Lman1l        | lectin, mannose-binding 1 like                                                                  | 2,19 | 3,80E-03 | 1,32 | 6,42E-02 |
| 69784  | 1500009L16Rik | RIKEN cDNA 1500009L16 gene                                                                      | 2,19 | 3,33E-04 | 2,00 | 1,58E-04 |
| 53608  | Map3k6        | mitogen-activated protein kinase kinase 6                                                       | 2,19 | 3,34E-06 | 1,69 | 2,40E-03 |
| 12527  | Cd9           | CD9 antigen                                                                                     | 2,18 | 5,30E-05 | 1,75 | 2,01E-03 |
| 17869  | Myc           | myelocytomatosis oncogene                                                                       | 2,18 | 1,02E-04 | 1,87 | 3,71E-03 |
| 494504 | Apcdd1        | adenomatosis polyposis coli down-regulated 1                                                    | 2,18 | 7,24E-03 | 1,63 | 3,84E-02 |
| 68655  | Fndc1         | fibronectin type III domain containing 1                                                        | 2,17 | 1,67E-03 | 1,73 | 1,29E-02 |
| 69219  | Ddah1         | dimethylarginine dimethylaminohydrolase 1                                                       | 2,17 | 2,07E-03 | 1,55 | 5,48E-03 |
| 268857 | Nlrc3         | NLR family, CARD domain containing 3                                                            | 2,17 | 1,01E-03 | 2,19 | 1,18E-03 |
| 319480 | Itga11        | integrin alpha 11                                                                               | 2,16 | 2,15E-03 | 1,95 | 5,37E-04 |
| 56620  | Clec4n        | C-type lectin domain family 4, member n                                                         | 2,16 | 3,13E-03 | 1,94 | 4,56E-03 |
| 65963  | Tmem176b      | transmembrane protein 176B                                                                      | 2,16 | 2,32E-05 | 1,92 | 8,22E-05 |
| 68585  | Rtn4          | reticulon 4                                                                                     | 2,15 | 8,85E-05 | 1,86 | 8,26E-02 |
| 319660 | Agmo          | alkylglycerol monooxygenase                                                                     | 2,14 | 1,60E-02 | 1,56 | 4,92E-02 |
| 74241  | Chpf          | chondroitin polymerizing factor                                                                 | 2,14 | 3,91E-05 | 2,14 | 5,46E-06 |
| 15959  | Ifit3         | interferon-induced protein with tetratricopeptide repeats 3                                     | 2,14 | 5,12E-03 | 1,65 | 1,62E-02 |
| 12260  | C1qb          | complement component 1, q subcomponent, beta polypeptide                                        | 2,14 | 3,86E-04 | 1,87 | 3,73E-04 |
| 17135  | Mafk          | v-maf musculoaponeurotic fibrosarcoma oncogene family, protein K (avian)                        | 2,13 | 2,82E-05 | 1,84 | 2,27E-04 |
| 18858  | Pmp22         | peripheral myelin protein 22                                                                    | 2,13 | 1,90E-05 | 1,69 | 2,36E-05 |
| 69538  | Antxr1        | anthrax toxin receptor 1                                                                        | 2,13 | 2,68E-04 | 1,78 | 8,77E-04 |
| 21973  | Top2a         | topoisomerase (DNA) II alpha                                                                    | 2,13 | 5,86E-04 | 1,67 | 9,51E-04 |
| 12475  | Cd14          | CD14 antigen                                                                                    | 2,12 | 1,29E-02 | 1,84 | 1,94E-02 |
| 18951  | Sept5         | septin 5                                                                                        | 2,12 | 4,49E-03 | 1,84 | 1,37E-02 |
| 17390  | Mmp2          | matrix metalloproteinase 2                                                                      | 2,12 | 3,10E-04 | 1,76 | 2,00E-05 |
| 69774  | Ms4a6b        | membrane-spanning 4-domains, subfamily A, member 6B                                             | 2,12 | 8,77E-03 | 1,58 | 4,64E-02 |
| 56772  | Mllt11        | myeloid/lymphoid or mixed-lineage leukemia (trithorax homolog, Drosophila); translocated to, 11 | 2,11 | 1,12E-02 | 1,80 | 1,36E-02 |
| 11629  | Aif1          | allograft inflammatory factor 1                                                                 | 2,11 | 7,19E-03 | 2,08 | 4,33E-03 |
| 15939  | Ier5          | immediate early response 5                                                                      | 2,11 | 2,65E-04 | 2,20 | 8,99E-05 |
| 19229  | Ptk2b         | PTK2 protein tyrosine kinase 2 beta                                                             | 2,11 | 6,73E-03 | 2,13 | 3,10E-03 |
| 244152 | Tsku          | tsukushi                                                                                        | 2,11 | 1,27E-03 | 1,49 | 2,00E-02 |
| 69769  | Tnfaip8l2     | tumor necrosis factor, alpha-induced protein 8-like 2                                           | 2,11 | 2,74E-02 | 1,82 | 3,26E-02 |
| 98365  | Slamf9        | SLAM family member 9                                                                            | 2,10 | 4,09E-04 | 1,76 | 6,33E-04 |
| 50720  | Sacs          | sacsin                                                                                          | 2,09 | 4,10E-04 | 2,18 | 8,66E-04 |
| 21810  | Tgfb1         | transforming growth factor, beta induced                                                        | 2,09 | 9,22E-04 | 1,89 | 4,46E-04 |
| 65112  | Pmepa1        | prostate transmembrane protein, androgen induced 1                                              | 2,09 | 4,78E-04 | 1,77 | 3,26E-04 |
| 70892  | Tull7         | tubulin tyrosine ligase-like family, member 7                                                   | 2,08 | 4,77E-05 | 1,78 | 9,11E-03 |
| 16924  | Lnx1          | ligand of numb-protein X 1                                                                      | 2,08 | 2,37E-05 | 1,78 | 4,15E-04 |
| 73710  | Tubb2b        | tubulin, beta 2B class IIB                                                                      | 2,08 | 8,01E-04 | 1,65 | 1,29E-02 |
| 17022  | Lum           | lumican                                                                                         | 2,08 | 1,58E-03 | 1,54 | 1,92E-02 |
| 217333 | Trim47        | tripartite motif-containing 47                                                                  | 2,08 | 7,25E-05 | 1,96 | 1,87E-04 |
| 71690  | Esm1          | endothelial cell-specific molecule 1                                                            | 2,08 | 7,15E-04 | 1,53 | 6,79E-02 |
| 20692  | Sparc         | secreted acidic cysteine rich glycoprotein                                                      | 2,07 | 2,36E-04 | 1,62 | 1,87E-03 |
| 107995 | Cdc20         | cell division cycle 20                                                                          | 2,07 | 2,97E-04 | 1,46 | 1,35E-02 |
| 20969  | Sdc1          | syndecan 1                                                                                      | 2,07 | 5,36E-04 | 1,85 | 2,78E-04 |
| 23876  | Fbln5         | fibulin 5                                                                                       | 2,06 | 2,72E-03 | 1,97 | 8,34E-05 |

|           |               |                                                                                |      |          |      |          |
|-----------|---------------|--------------------------------------------------------------------------------|------|----------|------|----------|
| 17476     | Mpeg1         | macrophage expressed gene 1                                                    | 2,06 | 1,08E-04 | 1,91 | 2,85E-04 |
| 20375     | Sfp1          | SFFV proviral integration 1                                                    | 2,05 | 1,68E-02 | 2,26 | 2,87E-02 |
| 16971     | Lrp1          | low density lipoprotein receptor-related protein 1                             | 2,05 | 4,49E-04 | 1,80 | 2,07E-04 |
| 54153     | Rasa4         | RAS p21 protein activator 4                                                    | 2,05 | 2,63E-02 | 1,69 | 5,12E-02 |
| 24047     | Ccl19         | chemokine (C-C motif) ligand 19                                                | 2,05 | 1,12E-03 | 1,34 | 1,01E-01 |
| 14789     | Leprel2       | leprecan-like 2                                                                | 2,05 | 5,84E-04 | 1,64 | 3,33E-03 |
| 64138     | Ctsz          | cathepsin Z                                                                    | 2,05 | 1,32E-03 | 1,65 | 1,11E-02 |
| 17996     | Neb           | nebulin                                                                        | 2,05 | 1,82E-02 | 2,00 | 2,43E-02 |
| 72275     | 2200002D01Rik | RIKEN cDNA 2200002D01 gene                                                     | 2,05 | 1,25E-02 | 2,05 | 9,82E-03 |
| 216233    | Socs2         | suppressor of cytokine signaling 2                                             | 2,04 | 1,72E-02 | 1,91 | 2,72E-02 |
| 14745     | Lpar1         | lysophosphatidic acid receptor 1                                               | 2,04 | 4,88E-04 | 1,62 | 9,92E-03 |
| 100040792 | Gm11627       | predicted gene 11627                                                           | 2,04 | 3,86E-03 | 1,96 | 5,09E-03 |
| 54720     | Rcan1         | regulator of calcineurin 1                                                     | 2,04 | 2,76E-03 | 1,90 | 4,86E-03 |
| 19222     | Ptgir         | prostaglandin I receptor (IP)                                                  | 2,04 | 1,90E-04 | 1,73 | 6,88E-04 |
| 239559    | A4galt        | alpha 1,4-galactosyltransferase                                                | 2,04 | 4,00E-02 | 1,29 | 2,65E-01 |
| 16005     | Igfals        | insulin-like growth factor binding protein, acid labile subunit                | 2,04 | 1,93E-02 | 2,28 | 9,73E-03 |
| 50769     | Atp8a2        | ATPase, aminophospholipid transporter-like, class I, type 8A, member 2         | 2,03 | 9,96E-05 | 2,14 | 6,72E-04 |
| 72709     | C1qtnf6       | C1q and tumor necrosis factor related protein 6                                | 2,03 | 1,71E-03 | 1,62 | 5,91E-05 |
| 76974     | 1190003J15Rik | RIKEN cDNA 1190003J15 gene                                                     | 2,03 | 9,22E-03 | 2,08 | 3,68E-02 |
| 67865     | Rgs10         | regulator of G-protein signalling 10                                           | 2,03 | 6,72E-04 | 1,58 | 4,90E-04 |
| 12505     | Cd44          | CD44 antigen                                                                   | 2,02 | 2,39E-02 | 1,79 | 3,13E-02 |
| 23880     | Fyb           | FYN binding protein                                                            | 2,02 | 1,66E-04 | 1,91 | 3,09E-03 |
| 14778     | Gpx3          | glutathione peroxidase 3                                                       | 2,02 | 4,08E-04 | 1,80 | 1,36E-04 |
| 52502     | Carhsp1       | calcium regulated heat stable protein 1                                        | 2,02 | 5,40E-05 | 1,67 | 5,02E-05 |
| 17345     | Mki67         | antigen identified by monoclonal antibody Ki 67                                | 2,02 | 2,77E-03 | 1,42 | 2,21E-02 |
| 57265     | Fzd2          | frizzled homolog 2 (Drosophila)                                                | 2,02 | 5,85E-04 | 2,39 | 5,12E-05 |
| 14017     | Evi2a         | ecotropic viral integration site 2a                                            | 2,02 | 1,62E-03 | 1,71 | 8,80E-03 |
| 76686     | Clip3         | CAP-GLY domain containing linker protein 3                                     | 2,02 | 3,65E-03 | 1,98 | 5,81E-03 |
| 26949     | Vat1          | vesicle amine transport protein 1 homolog (T californica)                      | 2,01 | 2,53E-03 | 1,85 | 1,09E-02 |
| 73656     | Ms4a6c        | membrane-spanning 4-domains, subfamily A, member 6C                            | 2,01 | 1,64E-03 | 1,53 | 4,79E-03 |
| 52377     | Rcn3          | reticulocalbin 3, EF-hand calcium binding domain                               | 2,01 | 2,93E-04 | 1,74 | 2,15E-04 |
| 55990     | Fmo2          | flavin containing monooxygenase 2                                              | 2,01 | 1,54E-02 | 1,39 | 4,44E-02 |
| 72500     | Ier5l         | immediate early response 5-like                                                | 2,01 | 1,50E-03 | 3,57 | 6,72E-05 |
| 50909     | C1ra          | complement component 1, r subcomponent A                                       | 2,01 | 1,03E-04 | 1,84 | 1,76E-04 |
| 21815     | Tgif1         | TGFB-induced factor homeobox 1                                                 | 2,01 | 1,01E-02 | 1,50 | 5,37E-02 |
| 223453    | Dap           | death-associated protein                                                       | 2,01 | 8,30E-04 | 1,71 | 6,59E-04 |
| 329384    | Ptrh1         | peptidyl-tRNA hydrolase 1 homolog (S. cerevisiae)                              | 2,00 | 1,28E-03 | 2,33 | 2,05E-03 |
| 13040     | Ctss          | cathepsin S                                                                    | 2,00 | 2,18E-05 | 1,77 | 1,42E-04 |
| 268709    | Fam107a       | family with sequence similarity 107, member A                                  | 2,00 | 4,19E-03 | 1,10 | 2,60E-01 |
| 17218     | Mcm5          | minichromosome maintenance deficient 5, cell division cycle 46 (S. cerevisiae) | 2,00 | 4,30E-03 | 1,94 | 6,20E-03 |
| 14114     | Fbln1         | fibulin 1                                                                      | 2,00 | 1,79E-03 | 1,97 | 1,63E-03 |
| 80914     | Uck2          | uridine-cytidine kinase 2                                                      | 2,00 | 1,64E-04 | 1,95 | 9,31E-05 |
| 237253    | Lrp11         | low density lipoprotein receptor-related protein 11                            | 1,99 | 8,28E-06 | 2,18 | 2,21E-04 |
| 14793     | Cdca3         | cell division cycle associated 3                                               | 1,99 | 1,67E-02 | 1,36 | 9,93E-02 |
| 69938     | Scrn1         | secernin 1                                                                     | 1,99 | 2,07E-02 | 1,69 | 5,52E-02 |
| 232984    | B3gnt8        | UDP-GlcNAc:betaGal beta-1,3-N-acetylglucosaminyltransferase 8                  | 1,99 | 4,06E-02 | 1,40 | 1,46E-01 |
| 106957    | Slc39a6       | solute carrier family 39 (metal ion transporter), member 6                     | 1,99 | 1,37E-03 | 1,73 | 9,42E-03 |
| 22240     | Dpysl3        | dihydropyrimidinase-like 3                                                     | 1,98 | 2,42E-04 | 1,73 | 1,57E-03 |
| 11752     | Anxa8         | annexin A8                                                                     | 1,98 | 5,03E-03 | 1,22 | 7,09E-02 |
| 16998     | Ltbp3         | latent transforming growth factor beta binding protein 3                       | 1,98 | 5,21E-04 | 1,82 | 7,67E-05 |
| 16848     | Lfng          | LFNG O-fucosylpeptide 3-beta-N-acetylglucosaminyltransferase                   | 1,98 | 7,66E-03 | 1,69 | 2,71E-03 |
| 84094     | Plvap         | plasmalemma vesicle associated protein                                         | 1,98 | 1,37E-02 | 1,89 | 2,11E-02 |
| 67246     | 2810474O19Rik | RIKEN cDNA 2810474O19 gene                                                     | 1,98 | 2,06E-02 | 1,72 | 1,86E-02 |
| 71093     | Atoh8         | atonal homolog 8 (Drosophila)                                                  | 1,98 | 4,21E-04 | 1,82 | 5,78E-04 |
| 231821    | Adap1         | ArfGAP with dual PH domains 1                                                  | 1,98 | 2,85E-05 | 2,30 | 1,72E-04 |
| 226101    | Myof          | myoferlin                                                                      | 1,98 | 5,78E-04 | 1,83 | 4,35E-03 |
| 12825     | Col3a1        | collagen, type III, alpha 1                                                    | 1,98 | 3,26E-03 | 1,73 | 3,24E-03 |
| 244198    | Olfml1        | olfactomedin-like 1                                                            | 1,98 | 7,77E-04 | 1,91 | 4,12E-03 |
| 16068     | Il18bp        | interleukin 18 binding protein                                                 | 1,98 | 1,05E-03 | 1,93 | 1,23E-04 |
| 212898    | Dse           | dermatan sulfate epimerase                                                     | 1,98 | 1,24E-04 | 1,66 | 8,13E-04 |
| 23882     | Gadd45g       | growth arrest and DNA-damage-inducible 45 gamma                                | 1,97 | 4,87E-03 | 1,79 | 2,69E-03 |
| 20200     | S100a6        | S100 calcium binding protein A6 (calcyclin)                                    | 1,97 | 1,57E-03 | 1,83 | 3,83E-03 |
| 13849     | Ephx1         | epoxide hydrolase 1, microsomal                                                | 1,97 | 2,39E-04 | 1,64 | 4,70E-03 |
| 102644    | Oaf           | OAF homolog (Drosophila)                                                       | 1,96 | 2,03E-04 | 1,67 | 1,42E-05 |
| 217203    | Tmem106a      | transmembrane protein 106A                                                     | 1,96 | 2,25E-03 | 1,68 | 8,38E-03 |
| 12257     | Tspo          | translocator protein                                                           | 1,95 | 5,26E-05 | 1,68 | 3,96E-04 |
| 27221     | Chaf1a        | chromatin assembly factor 1, subunit A (p150)                                  | 1,95 | 1,86E-04 | 1,76 | 6,03E-04 |
| 20249     | Scd1          | stearoyl-Coenzyme A desaturase 1                                               | 1,95 | 4,90E-03 | 1,60 | 1,63E-02 |

|           |         |                                                                             |      |          |      |          |
|-----------|---------|-----------------------------------------------------------------------------|------|----------|------|----------|
| 12043     | Bcl2    | B cell leukemia/lymphoma 2                                                  | 1,95 | 1,46E-03 | 1,90 | 1,81E-03 |
| 56490     | Zbtb20  | zinc finger and BTB domain containing 20                                    | 1,95 | 2,35E-02 | 1,74 | 2,35E-02 |
| 27494     | Amot    | angiomin                                                                    | 1,94 | 7,24E-04 | 1,94 | 2,56E-04 |
| 20893     | Bhlhe40 | basic helix-loop-helix family, member e40                                   | 1,94 | 7,73E-03 | 1,87 | 2,36E-02 |
| 21335     | Tacc3   | transforming, acidic coiled-coil containing protein 3                       | 1,94 | 1,68E-03 | 1,40 | 1,91E-02 |
| 18484     | Pam     | peptidylglycine alpha-amidating monooxygenase                               | 1,94 | 1,18E-04 | 1,81 | 8,83E-06 |
| 56193     | Plek    | pleckstrin                                                                  | 1,94 | 2,37E-02 | 1,63 | 5,11E-02 |
| 71946     | Endod1  | endonuclease domain containing 1                                            | 1,94 | 3,83E-04 | 1,43 | 3,03E-03 |
| 16000     | Igf1    | insulin-like growth factor 1                                                | 1,93 | 8,50E-04 | 1,78 | 3,05E-03 |
| 100415914 | Gm12505 | predicted gene 12505                                                        | 1,93 | 6,76E-03 | 1,83 | 2,37E-03 |
| 16477     | Junb    | Jun-B oncogene                                                              | 1,93 | 7,32E-04 | 2,16 | 1,98E-04 |
| 21858     | Timp2   | tissue inhibitor of metalloproteinase 2                                     | 1,93 | 2,89E-04 | 1,76 | 5,61E-05 |
| 74127     | Krt80   | keratin 80                                                                  | 1,93 | 5,34E-03 | 1,43 | 1,12E-01 |
| 20195     | S100a11 | S100 calcium binding protein A11 (calgizzarin)                              | 1,93 | 4,05E-04 | 1,58 | 1,98E-03 |
| 22146     | Tuba1c  | tubulin, alpha 1C                                                           | 1,93 | 1,73E-03 | 1,85 | 3,57E-04 |
| 12262     | C1qc    | complement component 1, q subcomponent, C chain                             | 1,92 | 1,12E-03 | 1,73 | 1,36E-03 |
| 17035     | Lxn     | latexin                                                                     | 1,92 | 9,33E-04 | 1,49 | 1,78E-02 |
| 99151     | Cercam  | cerebral endothelial cell adhesion molecule                                 | 1,92 | 1,64E-03 | 1,63 | 3,25E-03 |
| 15512     | Hspa2   | heat shock protein 2                                                        | 1,92 | 2,14E-04 | 1,69 | 1,09E-03 |
| 67622     | Mxra7   | matrix-remodelling associated 7                                             | 1,92 | 6,00E-05 | 1,86 | 1,46E-05 |
| 17873     | Gadd45b | growth arrest and DNA-damage-inducible 45 beta                              | 1,92 | 3,61E-02 | 1,67 | 6,91E-02 |
| 12531     | Cdc25b  | cell division cycle 25B                                                     | 1,92 | 1,63E-02 | 1,55 | 2,25E-02 |
| 12259     | C1qa    | complement component 1, q subcomponent, alpha polypeptide                   | 1,91 | 4,38E-04 | 1,69 | 4,22E-03 |
| 57814     | Kcne4   | potassium voltage-gated channel, Isk-related subfamily, gene 4              | 1,91 | 1,02E-03 | 1,54 | 4,74E-02 |
| 18542     | Pcolce  | procollagen C-endopeptidase enhancer protein                                | 1,91 | 3,47E-04 | 1,58 | 2,28E-03 |
| 109042    | Prkcdbp | protein kinase C, delta binding protein                                     | 1,91 | 1,20E-02 | 1,99 | 1,41E-02 |
| 13601     | Ecm1    | extracellular matrix protein 1                                              | 1,91 | 6,71E-03 | 1,74 | 1,16E-02 |
| 18146     | Npdc1   | neural proliferation, differentiation and control gene 1                    | 1,91 | 1,52E-02 | 1,60 | 3,88E-02 |
| 242109    | Zfp697  | zinc finger protein 697                                                     | 1,90 | 2,22E-03 | 1,62 | 4,00E-03 |
| 214791    | Sertad4 | SERTA domain containing 4                                                   | 1,90 | 4,88E-04 | 1,55 | 6,26E-03 |
| 108075    | Ltbp4   | latent transforming growth factor beta binding protein 4                    | 1,90 | 3,26E-04 | 1,86 | 2,28E-03 |
| 15170     | Ptpn6   | protein tyrosine phosphatase, non-receptor type 6                           | 1,90 | 2,20E-04 | 1,65 | 1,61E-03 |
| 208164    | Fam180a | family with sequence similarity 180, member A                               | 1,89 | 1,81E-02 | 1,23 | 1,99E-01 |
| 94352     | Lox12   | lysyl oxidase-like 2                                                        | 1,89 | 2,27E-03 | 1,56 | 2,76E-04 |
| 12828     | Col4a3  | collagen, type IV, alpha 3                                                  | 1,89 | 7,85E-03 | 1,63 | 2,84E-03 |
| 12306     | Anxa2   | annexin A2                                                                  | 1,89 | 7,84E-05 | 1,57 | 1,59E-03 |
| 23888     | Gpc6    | glypican 6                                                                  | 1,89 | 2,63E-04 | 1,52 | 4,38E-03 |
| 17534     | Mrc2    | mannose receptor, C type 2                                                  | 1,89 | 1,75E-03 | 1,64 | 2,04E-04 |
| 20266     | Scn1b   | sodium channel, voltage-gated, type I, beta                                 | 1,89 | 3,86E-05 | 1,72 | 8,61E-05 |
| 76527     | Il34    | interleukin 34                                                              | 1,88 | 1,31E-03 | 1,65 | 5,37E-03 |
| 22177     | Tyrobp  | TYRO protein tyrosine kinase binding protein                                | 1,88 | 1,12E-03 | 1,63 | 2,05E-03 |
| 14681     | Gnao1   | guanine nucleotide binding protein, alpha O                                 | 1,88 | 4,99E-04 | 1,68 | 1,53E-03 |
| 75646     | Rai14   | retinoic acid induced 14                                                    | 1,88 | 3,22E-04 | 1,47 | 2,27E-03 |
| 14775     | Gpx1    | glutathione peroxidase 1                                                    | 1,88 | 2,20E-04 | 1,88 | 1,78E-04 |
| 83675     | Bicc1   | bicaudal C homolog 1 (Drosophila)                                           | 1,88 | 3,92E-04 | 1,75 | 1,04E-05 |
| 77976     | Nuak1   | NUAK family, SNF1-like kinase, 1                                            | 1,88 | 1,33E-05 | 1,49 | 2,81E-02 |
| 18223     | Numb1   | numb-like                                                                   | 1,88 | 2,07E-03 | 1,81 | 4,56E-03 |
| 213484    | Nudt18  | nudix (nucleoside diphosphate linked moiety X)-type motif 18                | 1,88 | 5,67E-04 | 1,69 | 1,04E-05 |
| 65972     | Ifi30   | interferon gamma inducible protein 30                                       | 1,88 | 1,52E-05 | 1,48 | 2,64E-04 |
| 16668     | Krt18   | keratin 18                                                                  | 1,87 | 3,77E-03 | 1,26 | 1,58E-01 |
| 20845     | Star    | steroidogenic acute regulatory protein                                      | 1,87 | 1,19E-03 | 1,31 | 4,17E-02 |
| 237560    | Lrrc10  | leucine rich repeat containing 10                                           | 1,87 | 5,54E-04 | 1,81 | 8,90E-04 |
| 17095     | Lyl1    | lymphoblastomic leukemia 1                                                  | 1,86 | 1,48E-02 | 1,79 | 3,83E-02 |
| 68939     | Ras11b  | RAS-like, family 11, member B                                               | 1,86 | 3,64E-05 | 1,60 | 4,57E-04 |
| 381259    | Tmem237 | transmembrane protein 237                                                   | 1,86 | 2,15E-02 | 1,49 | 5,76E-02 |
| 64297     | Gprc5b  | G protein-coupled receptor, family C, group 5, member B                     | 1,86 | 1,83E-04 | 1,47 | 4,85E-03 |
| 12684     | Cideb   | cell death-inducing DNA fragmentation factor, alpha subunit-like effector B | 1,86 | 6,30E-03 | 1,97 | 4,16E-03 |
| 14131     | Fcgr3   | Fc receptor, IgG, low affinity III                                          | 1,85 | 4,46E-04 | 1,59 | 2,05E-04 |
| 224796    | Clic5   | chloride intracellular channel 5                                            | 1,85 | 6,72E-05 | 1,69 | 1,50E-04 |
| 23833     | Cd52    | CD52 antigen                                                                | 1,85 | 1,96E-03 | 1,42 | 2,06E-02 |
| 12702     | Socs3   | suppressor of cytokine signaling 3                                          | 1,85 | 2,50E-03 | 1,58 | 3,51E-03 |
| 12829     | Col4a4  | collagen, type IV, alpha 4                                                  | 1,85 | 4,11E-02 | 1,65 | 8,03E-02 |
| 11690     | Alox5ap | arachidonate 5-lipoxygenase activating protein                              | 1,85 | 4,41E-03 | 1,54 | 7,82E-03 |
| 212943    | Fam46a  | family with sequence similarity 46, member A                                | 1,85 | 7,12E-04 | 1,42 | 5,31E-02 |
| 13800     | Enah    | enabled homolog (Drosophila)                                                | 1,84 | 5,54E-05 | 1,65 | 1,21E-03 |
| 233107    | Kctd15  | potassium channel tetramerisation domain containing 15                      | 1,84 | 2,35E-02 | 1,79 | 2,85E-02 |
| 218454    | Lhfp12  | lipoma HMGIC fusion partner-like 2                                          | 1,84 | 1,66E-02 | 1,54 | 5,50E-02 |
| 21835     | Thrsp   | thyroid hormone responsive                                                  | 1,84 | 8,64E-04 | 1,90 | 6,07E-04 |
| 224024    | Scarf2  | scavenger receptor class F, member 2                                        | 1,83 | 6,41E-03 | 2,42 | 5,50E-03 |

|        |               |                                                                                               |      |          |      |          |
|--------|---------------|-----------------------------------------------------------------------------------------------|------|----------|------|----------|
| 69221  | 2410006H16Rik | RIKEN cDNA 2410006H16 gene                                                                    | 1,83 | 9,60E-04 | 1,62 | 2,84E-03 |
| 14182  | Fgfr1         | fibroblast growth factor receptor 1                                                           | 1,83 | 2,69E-03 | 1,67 | 1,66E-02 |
| 233328 | Lrrk1         | leucine-rich repeat kinase 1                                                                  | 1,83 | 5,08E-04 | 1,55 | 2,82E-03 |
| 13555  | E2f1          | E2F transcription factor 1                                                                    | 1,83 | 4,57E-03 | 1,76 | 2,53E-03 |
| 75686  | Nudt16        | nudix (nucleoside diphosphate linked moiety X)-type motif 16                                  | 1,83 | 3,70E-02 | 1,68 | 5,51E-02 |
| 12372  | Casq1         | calsequestrin 1                                                                               | 1,83 | 2,86E-02 | 1,43 | 1,70E-02 |
| 54353  | Skap2         | src family associated phosphoprotein 2                                                        | 1,83 | 7,39E-04 | 1,54 | 2,59E-03 |
| 104009 | Qsox1         | quiescin Q6 sulfhydryl oxidase 1                                                              | 1,83 | 1,13E-04 | 1,67 | 4,21E-04 |
| 330267 | Thsd7a        | thrombospondin, type 1, domain containing 7A                                                  | 1,83 | 1,54E-03 | 1,58 | 2,30E-03 |
| 629378 | Dact3         | dapper homolog 3, antagonist of beta-catenin (xenopus)                                        | 1,83 | 3,10E-04 | 2,27 | 4,56E-05 |
| 53614  | Reck          | reversion-inducing-cysteine-rich protein with kazal motifs                                    | 1,82 | 1,87E-03 | 1,65 | 1,46E-03 |
| 228846 | D630003M21Rik | RIKEN cDNA D630003M21 gene                                                                    | 1,82 | 2,99E-03 | 1,41 | 5,35E-03 |
| 12295  | Cacnb1        | calcium channel, voltage-dependent, beta 1 subunit                                            | 1,82 | 2,83E-02 | 1,87 | 3,82E-02 |
| 67092  | Gatm          | glycine amidinotransferase (L-arginine:glycine amidinotransferase)                            | 1,82 | 1,13E-02 | 1,43 | 6,03E-02 |
| 320078 | Olfml2b       | olfactomedin-like 2B                                                                          | 1,82 | 8,20E-03 | 1,49 | 4,57E-02 |
| 78321  | Ankrd23       | ankyrin repeat domain 23                                                                      | 1,82 | 2,72E-04 | 1,46 | 8,71E-03 |
| 13078  | Cyp1b1        | cytochrome P450, family 1, subfamily b, polypeptide 1                                         | 1,82 | 4,16E-03 | 1,71 | 2,50E-03 |
| 68262  | Agpat4        | 1-acylglycerol-3-phosphate O-acyltransferase 4 (lysophosphatidic acid acyltransferase, delta) | 1,82 | 6,71E-03 | 1,49 | 2,97E-02 |
| 20304  | Ccl5          | chemokine (C-C motif) ligand 5                                                                | 1,82 | 4,62E-02 | 1,73 | 2,61E-02 |
| 71660  | Rarres2       | retinoic acid receptor responder (tazarotene induced) 2                                       | 1,82 | 4,54E-03 | 1,38 | 3,68E-02 |
| 320472 | Ppm1e         | protein phosphatase 1E (PP2C domain containing)                                               | 1,81 | 7,85E-05 | 1,39 | 1,58E-03 |
| 19268  | Ptprf         | protein tyrosine phosphatase, receptor type, F                                                | 1,81 | 1,42E-03 | 1,48 | 3,01E-03 |
| 234779 | Plcg2         | phospholipase C, gamma 2                                                                      | 1,81 | 6,77E-03 | 1,84 | 1,23E-02 |
| 12822  | Col18a1       | collagen, type XVIII, alpha 1                                                                 | 1,81 | 1,36E-03 | 1,62 | 6,04E-03 |
| 12258  | Serping1      | serine (or cysteine) peptidase inhibitor, clade G, member 1                                   | 1,81 | 2,28E-04 | 1,57 | 3,73E-04 |
| 231162 | Cyt11         | cytokine-like 1                                                                               | 1,81 | 1,14E-02 | 1,16 | 5,59E-01 |
| 11816  | ApoE          | apolipoprotein E                                                                              | 1,81 | 1,76E-03 | 1,99 | 9,66E-05 |
| 14129  | Fcgr1         | Fc receptor, IgG, high affinity I                                                             | 1,81 | 1,64E-03 | 1,50 | 2,42E-02 |
| 14758  | Gpm6b         | glycoprotein m6b                                                                              | 1,81 | 6,03E-04 | 1,44 | 5,00E-03 |
| 55963  | Slc1a4        | solute carrier family 1 (glutamate/neutral amino acid transporter), member 4                  | 1,81 | 2,95E-04 | 1,31 | 3,10E-02 |
| 22041  | Trf           | transferrin                                                                                   | 1,80 | 1,64E-03 | 1,52 | 1,13E-02 |
| 20616  | Snap91        | synaptosomal-associated protein 91                                                            | 1,80 | 2,89E-02 | 1,88 | 2,37E-02 |
| 26934  | Racgap1       | Rac GTPase-activating protein 1                                                               | 1,80 | 3,59E-03 | 1,34 | 8,20E-03 |
| 12305  | Ddr1          | discoidin domain receptor family, member 1                                                    | 1,80 | 7,49E-04 | 1,64 | 9,36E-04 |
| 76478  | Haus8         | 4HAUS augmin-like complex, subunit 8                                                          | 1,80 | 8,37E-06 | 1,54 | 2,79E-04 |
| 57138  | Slc12a5       | solute carrier family 12, member 5                                                            | 1,80 | 1,66E-02 | 1,79 | 7,43E-02 |
| 71389  | Chd6          | chromodomain helicase DNA binding protein 6                                                   | 1,79 | 1,16E-02 | 1,51 | 3,60E-02 |
| 320825 | Samd5         | sterile alpha motif domain containing 5                                                       | 1,79 | 1,93E-02 | 1,44 | 6,18E-02 |
| 21393  | Tcap          | titin-cap                                                                                     | 1,79 | 1,56E-03 | 1,75 | 1,09E-03 |
| 12524  | Cd86          | CD86 antigen                                                                                  | 1,79 | 1,73E-03 | 1,54 | 1,77E-02 |
| 244864 | Layn          | layilin                                                                                       | 1,79 | 1,90E-03 | 1,44 | 1,33E-02 |
| 66848  | Fuca2         | fucosidase, alpha-L-2, plasma                                                                 | 1,79 | 3,98E-04 | 1,75 | 1,18E-05 |
| 192166 | Sardh         | sarcosine dehydrogenase                                                                       | 1,79 | 2,60E-03 | 1,70 | 6,68E-04 |
| 20289  | Scx           | scleraxis                                                                                     | 1,79 | 3,04E-02 | 2,23 | 9,35E-03 |
| 13732  | Emp3          | epithelial membrane protein 3                                                                 | 1,78 | 1,96E-02 | 1,49 | 6,49E-02 |
| 59056  | Evc           | Ellis van Creveld gene syndrome                                                               | 1,78 | 7,47E-03 | 1,65 | 2,55E-02 |
| 20514  | Slc1a5        | solute carrier family 1 (neutral amino acid transporter), member 5                            | 1,78 | 2,00E-03 | 1,68 | 8,60E-05 |
| 19240  | Tmsb10        | thymosin, beta 10                                                                             | 1,78 | 5,50E-04 | 1,89 | 3,38E-04 |
| 14709  | Gng8          | guanine nucleotide binding protein (G protein), gamma 8                                       | 1,78 | 2,91E-02 | 1,55 | 4,41E-02 |
| 20720  | Serpine2      | serine (or cysteine) peptidase inhibitor, clade E, member 2                                   | 1,78 | 3,24E-03 | 1,35 | 3,64E-02 |
| 12774  | Ccr5          | chemokine (C-C motif) receptor 5                                                              | 1,78 | 2,30E-02 | 1,45 | 2,68E-02 |
| 107094 | Rrp12         | ribosomal RNA processing 12 homolog (S. cerevisiae)                                           | 1,77 | 5,69E-04 | 1,84 | 4,51E-04 |
| 12534  | Cdk1          | cyclin-dependent kinase 1                                                                     | 1,77 | 3,23E-02 | 1,48 | 9,32E-03 |
| 51793  | Ddah2         | dimethylarginine dimethylaminohydrolase 2                                                     | 1,77 | 3,04E-05 | 1,55 | 8,00E-05 |
| 12925  | Crip1         | cysteine-rich protein 1 (intestinal)                                                          | 1,77 | 9,05E-04 | 1,48 | 6,25E-03 |
| 214855 | Arid5a        | AT rich interactive domain 5A (MRF1-like)                                                     | 1,77 | 9,28E-03 | 1,44 | 3,44E-02 |
| 235505 | Cd109         | CD109 antigen                                                                                 | 1,77 | 1,31E-03 | 1,36 | 5,67E-03 |
| 12759  | Clu           | clusterin                                                                                     | 1,76 | 3,43E-03 | 1,56 | 2,72E-03 |
| 211949 | Spsb4         | splA/ryanodine receptor domain and SOCS box containing 4                                      | 1,76 | 5,08E-03 | 1,98 | 5,69E-03 |
| 216858 | Kctd11        | potassium channel tetramerisation domain containing 11                                        | 1,76 | 1,29E-04 | 1,39 | 2,79E-03 |
| 12444  | Ccnd2         | cyclin D2                                                                                     | 1,76 | 5,46E-04 | 1,66 | 1,90E-05 |
| 13627  | Eef1a1        | eukaryotic translation elongation factor 1 alpha 1                                            | 1,76 | 2,67E-05 | 1,44 | 1,77E-05 |
| 74617  | Scpep1        | serine carboxypeptidase 1                                                                     | 1,76 | 1,08E-03 | 1,53 | 3,95E-05 |
| 63913  | Fam129a       | family with sequence similarity 129, member A                                                 | 1,76 | 2,49E-03 | 1,57 | 1,42E-02 |
| 109019 | Nabp1         | nucleic acid binding protein 1                                                                | 1,75 | 1,09E-03 | 1,81 | 2,95E-03 |
| 19253  | Ptpn18        | protein tyrosine phosphatase, non-receptor type 18                                            | 1,75 | 5,06E-03 | 2,10 | 1,61E-03 |
| 17084  | Ly86          | lymphocyte antigen 86                                                                         | 1,75 | 2,67E-03 | 1,57 | 1,15E-02 |
| 20198  | S100a4        | S100 calcium binding protein A4                                                               | 1,75 | 2,06E-02 | 1,60 | 1,35E-02 |

|        |               |                                                                                |      |          |      |          |
|--------|---------------|--------------------------------------------------------------------------------|------|----------|------|----------|
| 54124  | Cks1b         | CDC28 protein kinase 1b                                                        | 1,75 | 4,53E-02 | 1,67 | 4,82E-02 |
| 106572 | Rab31         | RAB31, member RAS oncogene family                                              | 1,75 | 5,27E-04 | 1,49 | 1,36E-03 |
| 54123  | Irf7          | interferon regulatory factor 7                                                 | 1,75 | 6,19E-05 | 1,51 | 1,11E-03 |
| 381822 | 1190002F15Rik | RIKEN cDNA 1190002F15 gene                                                     | 1,75 | 3,67E-02 | 1,79 | 2,85E-02 |
| 21817  | Tgm2          | transglutaminase 2, C polypeptide                                              | 1,75 | 1,78E-03 | 1,58 | 3,58E-04 |
| 226123 | Morn4         | MORN repeat containing 4                                                       | 1,75 | 3,52E-04 | 1,41 | 7,59E-02 |
| 241327 | Olfml2a       | olfactomedin-like 2A                                                           | 1,75 | 2,61E-03 | 1,67 | 4,54E-02 |
| 54637  | Prpf2         | PRA1 domain family 2                                                           | 1,74 | 1,20E-02 | 1,29 | 1,16E-01 |
| 13025  | Ctla2b        | cytotoxic T lymphocyte-associated protein 2 beta                               | 1,74 | 6,16E-03 | 1,47 | 2,43E-02 |
| 232801 | Lilra5        | leukocyte immunoglobulin-like receptor, subfamily A (with TM domain), member 5 | 1,74 | 1,60E-03 | 1,56 | 6,06E-03 |
| 106795 | Tcf19         | transcription factor 19                                                        | 1,74 | 2,36E-02 | 1,68 | 2,00E-02 |
| 98363  | Efhd1         | EF hand domain containing 1                                                    | 1,74 | 3,17E-02 | 2,02 | 1,12E-02 |
| 57914  | Crlf2         | cytokine receptor-like factor 2                                                | 1,74 | 7,74E-02 | 2,39 | 3,77E-02 |
| 53322  | Nucb2         | nucleobindin 2                                                                 | 1,74 | 1,05E-02 | 1,59 | 2,15E-02 |
| 213575 | Dync2li1      | dynein cytoplasmic 2 light intermediate chain 1                                | 1,74 | 2,84E-04 | 1,73 | 2,44E-03 |
| 327946 | Gm12295       | predicted gene 12295                                                           | 1,74 | 3,34E-02 | 1,57 | 5,91E-02 |
| 27973  | Vkorc1        | vitamin K epoxide reductase complex, subunit 1                                 | 1,74 | 5,15E-05 | 1,54 | 4,06E-03 |
| 14389  | Gab2          | growth factor receptor bound protein 2-associated protein 2                    | 1,74 | 5,70E-04 | 1,45 | 5,11E-03 |
| 27367  | Rpl3          | ribosomal protein L3                                                           | 1,73 | 1,16E-04 | 1,55 | 1,31E-03 |
| 16419  | Itgb5         | integrin beta 5                                                                | 1,73 | 4,45E-04 | 1,51 | 3,54E-04 |
| 211228 | Lrrc25        | leucine rich repeat containing 25                                              | 1,73 | 2,19E-02 | 1,95 | 9,56E-03 |
| 50709  | Hist1h1e      | histone cluster 1, H1e                                                         | 1,73 | 2,61E-02 | 1,92 | 1,08E-02 |
| 232413 | Clec12a       | C-type lectin domain family 12, member a                                       | 1,73 | 1,57E-02 | 1,68 | 3,25E-02 |
| 22329  | Vcam1         | vascular cell adhesion molecule 1                                              | 1,73 | 3,78E-03 | 1,42 | 1,88E-02 |
| 109594 | Lmo1          | LIM domain only 1                                                              | 1,73 | 1,04E-04 | 1,57 | 6,42E-03 |
| 19171  | Psmb10        | proteasome (prosome, macropain) subunit, beta type 10                          | 1,73 | 8,88E-05 | 1,63 | 1,71E-04 |
| 26362  | Axl           | AXL receptor tyrosine kinase                                                   | 1,73 | 1,98E-03 | 1,43 | 1,26E-02 |
| 12606  | Cebpa         | CCAAT/enhancer binding protein (C/EBP), alpha                                  | 1,73 | 7,16E-03 | 1,98 | 6,06E-05 |
| 17105  | Lyz2          | lysozyme 2                                                                     | 1,73 | 2,71E-04 | 1,59 | 9,92E-03 |
| 69156  | Comtd1        | catechol-O-methyltransferase domain containing 1                               | 1,73 | 1,58E-05 | 1,87 | 2,72E-06 |
| 50773  | Nt5c          | 5',3'-nucleotidase, cytosolic                                                  | 1,72 | 8,49E-03 | 1,75 | 7,59E-03 |
| 68180  | Hyi           | hydroxypyruvate isomerase homolog (E. coli)                                    | 1,72 | 9,09E-03 | 1,95 | 2,01E-04 |
| 68041  | Mid1ip1       | Mid1 interacting protein 1 (gastrulation specific G12-like (zebrafish))        | 1,72 | 2,15E-02 | 1,67 | 1,34E-02 |
| 14211  | Smc2          | structural maintenance of chromosomes 2                                        | 1,72 | 1,31E-03 | 1,25 | 4,25E-02 |
| 67448  | Plxdc2        | plexin domain containing 2                                                     | 1,72 | 9,73E-05 | 1,46 | 3,98E-04 |
| 17392  | Mmp3          | matrix metalloproteinase 3                                                     | 1,72 | 1,79E-02 | 1,46 | 5,02E-02 |
| 73844  | Ankrd45       | ankyrin repeat domain 45                                                       | 1,72 | 1,46E-02 | 1,44 | 3,67E-02 |
| 71839  | Osgin1        | oxidative stress induced growth inhibitor 1                                    | 1,72 | 4,66E-02 | 1,12 | 5,53E-01 |
| 18439  | P2rx7         | purinergic receptor P2X, ligand-gated ion channel, 7                           | 1,72 | 1,99E-03 | 1,64 | 6,17E-03 |
| 20194  | S100a10       | S100 calcium binding protein A10 (calpactin)                                   | 1,72 | 1,96E-04 | 1,50 | 7,31E-04 |
| 109711 | Actn1         | actinin, alpha 1                                                               | 1,72 | 1,03E-03 | 1,49 | 4,05E-03 |
| 11867  | Arpc1b        | actin related protein 2/3 complex, subunit 1B                                  | 1,72 | 5,65E-03 | 1,49 | 2,59E-02 |
| 67876  | Coq10b        | coenzyme Q10 homolog B (S. cerevisiae)                                         | 1,72 | 1,11E-02 | 1,51 | 2,23E-02 |
| 140792 | Colec12       | collectin sub-family member 12                                                 | 1,71 | 1,57E-04 | 1,50 | 1,20E-04 |
| 223513 | Abra          | actin-binding Rho activating protein                                           | 1,71 | 5,98E-03 | 1,52 | 1,99E-02 |
| 56421  | Pfkip         | phosphofructokinase, platelet                                                  | 1,71 | 1,18E-04 | 1,60 | 1,03E-03 |
| 72056  | 1810055G02Rik | RIKEN cDNA 1810055G02 gene                                                     | 1,71 | 2,15E-04 | 1,48 | 1,24E-03 |
| 70445  | Cd248         | CD248 antigen, endosialin                                                      | 1,71 | 7,32E-03 | 1,72 | 4,28E-03 |
| 19122  | Prnp          | prion protein                                                                  | 1,71 | 1,04E-05 | 1,51 | 2,99E-04 |
| 105855 | Nckap11       | NCK associated protein 1 like                                                  | 1,71 | 4,15E-04 | 1,63 | 1,14E-03 |
| 12442  | Ccnb2         | cyclin B2                                                                      | 1,71 | 7,04E-03 | 1,11 | 1,54E-01 |
| 15902  | Id2           | inhibitor of DNA binding 2                                                     | 1,71 | 8,05E-03 | 1,63 | 6,58E-03 |
| 15162  | Hck           | hemopoietic cell kinase                                                        | 1,70 | 3,26E-05 | 1,49 | 1,51E-02 |
| 16985  | Lsp1          | lymphocyte specific 1                                                          | 1,70 | 9,95E-05 | 1,54 | 5,39E-04 |
| 109857 | Cbr3          | carbonyl reductase 3                                                           | 1,70 | 1,86E-02 | 1,44 | 2,67E-02 |
| 16172  | Il17ra        | interleukin 17 receptor A                                                      | 1,70 | 3,67E-03 | 1,53 | 2,35E-02 |
| 17215  | Mcm3          | minichromosome maintenance deficient 3 (S. cerevisiae)                         | 1,70 | 2,11E-03 | 1,58 | 1,59E-03 |
| 67220  | Plekho1       | pleckstrin homology domain containing, family O member 1                       | 1,70 | 3,46E-04 | 1,65 | 3,01E-04 |
| 19221  | Ptgfrn        | prostaglandin F2 receptor negative regulator                                   | 1,70 | 1,82E-03 | 1,55 | 8,17E-03 |
| 14999  | H2-DMb1       | histocompatibility 2, class II, locus Mb1                                      | 1,70 | 5,49E-02 | 1,72 | 4,44E-02 |
| 12877  | Cpeb1         | cytoplasmic polyadenylation element binding protein 1                          | 1,70 | 2,99E-03 | 1,47 | 1,68E-02 |
| 225724 | Mapk4         | mitogen-activated protein kinase 4                                             | 1,70 | 4,70E-04 | 1,59 | 8,80E-04 |
| 18826  | Lcp1          | lymphocyte cytosolic protein 1                                                 | 1,70 | 6,17E-04 | 1,52 | 1,14E-03 |
| 27261  | Dok3          | docking protein 3                                                              | 1,70 | 6,16E-02 | 1,88 | 3,49E-02 |
| 72318  | Cyth4         | cytohesin 4                                                                    | 1,70 | 3,25E-03 | 1,37 | 2,11E-02 |
| 14062  | F2r           | coagulation factor II (thrombin) receptor                                      | 1,69 | 9,84E-04 | 1,44 | 1,07E-05 |
| 14728  | Lilrb4        | leukocyte immunoglobulin-like receptor, subfamily B, member 4                  | 1,69 | 1,13E-03 | 1,58 | 2,40E-03 |
| 100910 | Chpf2         | chondroitin polymerizing factor 2                                              | 1,69 | 1,36E-04 | 1,37 | 3,42E-04 |
| 14127  | Fcer1g        | Fc receptor, IgE, high affinity I, gamma polypeptide                           | 1,69 | 2,25E-02 | 1,44 | 5,36E-02 |

|        |          |                                                                                        |      |          |      |          |
|--------|----------|----------------------------------------------------------------------------------------|------|----------|------|----------|
| 100129 | Gpr153   | G protein-coupled receptor 153                                                         | 1,69 | 3,64E-04 | 1,50 | 1,10E-03 |
| 171180 | Syt12    | synaptotagmin XII                                                                      | 1,69 | 1,04E-02 | 1,56 | 7,33E-03 |
| 14325  | Ftl1     | ferritin light chain 1                                                                 | 1,68 | 1,04E-03 | 1,46 | 1,20E-02 |
| 21390  | Tbxa2r   | thromboxane A2 receptor                                                                | 1,68 | 1,63E-03 | 1,60 | 2,75E-03 |
| 68010  | Bambi    | BMP and activin membrane-bound inhibitor, homolog (Xenopus laevis)                     | 1,68 | 6,29E-03 | 1,63 | 1,49E-02 |
| 109754 | Cyb5r3   | cytochrome b5 reductase 3                                                              | 1,68 | 1,81E-04 | 1,40 | 9,82E-04 |
| 236900 | Pdk3     | pyruvate dehydrogenase kinase, isoenzyme 3                                             | 1,68 | 2,11E-03 | 1,43 | 4,12E-02 |
| 72042  | Cot11    | coactosin-like 1 (Dictyostelium)                                                       | 1,68 | 9,46E-03 | 1,72 | 7,65E-02 |
| 79196  | Osbpl5   | oxysterol binding protein-like 5                                                       | 1,68 | 3,97E-04 | 1,46 | 5,65E-03 |
| 15957  | Ifit1    | interferon-induced protein with tetratricopeptide repeats 1                            | 1,68 | 7,27E-03 | 1,43 | 6,06E-02 |
| 66205  | Cd302    | CD302 antigen                                                                          | 1,67 | 9,54E-03 | 1,44 | 2,36E-02 |
| 16009  | Igfbp3   | insulin-like growth factor binding protein 3                                           | 1,67 | 7,81E-04 | 1,46 | 2,85E-03 |
| 104099 | Itga9    | integrin alpha 9                                                                       | 1,67 | 2,96E-03 | 1,57 | 3,47E-03 |
| 68303  | Fam114a1 | family with sequence similarity 114, member A1                                         | 1,67 | 5,07E-04 | 1,43 | 7,21E-04 |
| 68977  | Haghl    | hydroxyacylglutathione hydrolase-like                                                  | 1,67 | 8,12E-03 | 1,66 | 1,10E-02 |
| 14527  | Gcgr     | glucagon receptor                                                                      | 1,67 | 4,79E-02 | 1,26 | 1,90E-01 |
| 13717  | Eln      | elastin                                                                                | 1,67 | 4,01E-02 | 1,81 | 4,63E-02 |
| 106672 | AI413582 | expressed sequence AI413582                                                            | 1,67 | 4,34E-02 | 1,60 | 6,07E-02 |
| 67732  | Iah1     | isoamyl acetate-hydrolyzing esterase 1 homolog (S. cerevisiae)                         | 1,67 | 4,50E-04 | 1,61 | 1,11E-03 |
| 79201  | Tnfrsf23 | tumor necrosis factor receptor superfamily, member 23                                  | 1,67 | 1,27E-02 | 1,67 | 1,09E-02 |
| 107522 | Ece2     | endothelin converting enzyme 2                                                         | 1,67 | 2,21E-04 | 1,48 | 2,63E-03 |
| 12514  | Cd68     | CD68 antigen                                                                           | 1,67 | 1,35E-02 | 1,51 | 1,33E-02 |
| 16881  | Lig1     | ligase I, DNA, ATP-dependent                                                           | 1,67 | 5,44E-04 | 1,33 | 1,14E-02 |
| 80879  | Slc16a3  | solute carrier family 16 (monocarboxylic acid transporters), member 3                  | 1,66 | 3,77E-03 | 1,15 | 2,11E-01 |
| 15490  | Hsd17b7  | hydroxysteroid (17-beta) dehydrogenase 7                                               | 1,66 | 9,51E-03 | 1,83 | 1,82E-02 |
| 22271  | Upp1     | uridine phosphorylase 1                                                                | 1,66 | 1,81E-02 | 1,62 | 1,74E-02 |
| 114679 | Selm     | selenoprotein M                                                                        | 1,66 | 9,97E-05 | 1,45 | 9,62E-04 |
| 15446  | Hpgd     | hydroxyprostaglandin dehydrogenase 15 (NAD)                                            | 1,66 | 3,88E-02 | 1,48 | 8,37E-02 |
| 56336  | B4galt5  | UDP-Gal:betaGlcNAc beta 1,4-galactosyltransferase, polypeptide 5                       | 1,66 | 3,42E-03 | 1,53 | 1,01E-03 |
| 320292 | Rasgef1b | RasGEF domain family, member 1B                                                        | 1,66 | 5,31E-03 | 1,54 | 2,96E-03 |
| 78070  | Cpt1c    | carnitine palmitoyltransferase 1c                                                      | 1,66 | 1,14E-03 | 1,16 | 2,17E-01 |
| 17219  | Mcm6     | minichromosome maintenance deficient 6 (MIS5 homolog, S. pombe) (S. cerevisiae)        | 1,66 | 1,39E-03 | 1,57 | 2,30E-03 |
| 15374  | Hn1      | hematological and neurological expressed sequence 1                                    | 1,66 | 2,40E-04 | 1,60 | 8,68E-06 |
| 24088  | Tlr2     | toll-like receptor 2                                                                   | 1,66 | 1,79E-02 | 1,47 | 2,45E-02 |
| 108101 | Fermt3   | fermitin family homolog 3 (Drosophila)                                                 | 1,66 | 1,05E-03 | 1,48 | 1,05E-02 |
| 210530 | Leprel1  | leprecan-like 1                                                                        | 1,66 | 7,05E-03 | 1,51 | 1,77E-02 |
| 219151 | Scara3   | scavenger receptor class A, member 3                                                   | 1,65 | 9,74E-03 | 1,45 | 1,12E-02 |
| 14645  | Glul     | glutamate-ammonia ligase (glutamine synthetase)                                        | 1,65 | 4,38E-03 | 1,53 | 6,51E-03 |
| 67305  | Gpx7     | glutathione peroxidase 7                                                               | 1,65 | 9,49E-03 | 1,35 | 5,52E-02 |
| 13429  | Dnm1     | dynamamin 1                                                                            | 1,65 | 6,42E-04 | 1,70 | 4,47E-04 |
| 27056  | Irf5     | interferon regulatory factor 5                                                         | 1,65 | 1,89E-03 | 1,60 | 2,99E-03 |
| 17110  | Lyz1     | lysozyme 1                                                                             | 1,65 | 1,39E-03 | 1,51 | 3,80E-02 |
| 74760  | Rab3il1  | RAB3A interacting protein (rabin3)-like 1                                              | 1,65 | 2,49E-03 | 1,53 | 5,94E-03 |
| 19703  | Renbp    | renin binding protein                                                                  | 1,65 | 2,27E-02 | 1,34 | 9,53E-02 |
| 14063  | F2rl1    | coagulation factor II (thrombin) receptor-like 1                                       | 1,65 | 5,23E-03 | 1,25 | 1,52E-01 |
| 217371 | Rab40b   | Rab40b, member RAS oncogene family                                                     | 1,65 | 4,04E-03 | 1,60 | 5,56E-03 |
| 22402  | Wisp1    | WNT1 inducible signaling pathway protein 1                                             | 1,65 | 2,70E-02 | 1,17 | 6,01E-02 |
| 71712  | Dram1    | DNA-damage regulated autophagy modulator 1                                             | 1,65 | 2,30E-04 | 1,42 | 2,02E-02 |
| 233406 | Prc1     | protein regulator of cytokinesis 1                                                     | 1,64 | 4,20E-02 | 1,53 | 5,07E-02 |
| 54132  | Pdlim1   | PDZ and LIM domain 1 (elfin)                                                           | 1,64 | 7,82E-04 | 1,61 | 4,99E-05 |
| 12585  | Cdr2     | cerebellar degeneration-related 2                                                      | 1,64 | 3,35E-03 | 1,31 | 3,65E-02 |
| 17537  | Meis3    | Meis homeobox 3                                                                        | 1,64 | 3,15E-04 | 1,68 | 2,52E-04 |
| 12496  | Entpd2   | ectonucleoside triphosphate diphosphohydrolase 2                                       | 1,64 | 9,66E-05 | 1,54 | 9,59E-06 |
| 16852  | Lgals1   | lectin, galactose binding, soluble 1                                                   | 1,64 | 7,44E-04 | 1,47 | 3,47E-07 |
| 170768 | Pfkfb3   | 6-phosphofructo-2-kinase/fructose-2,6-biphosphatase 3                                  | 1,64 | 1,94E-02 | 1,48 | 1,38E-02 |
| 100952 | Emilin1  | elastin microfibril interfacer 1                                                       | 1,64 | 4,24E-03 | 1,44 | 1,12E-02 |
| 216869 | Arrb2    | arrestin, beta 2                                                                       | 1,63 | 1,98E-03 | 1,33 | 3,28E-02 |
| 68201  | Ccdc34   | coiled-coil domain containing 34                                                       | 1,63 | 4,37E-03 | 1,67 | 6,41E-03 |
| 242022 | Frem2    | Fras1 related extracellular matrix protein 2                                           | 1,63 | 1,18E-02 | 1,63 | 2,42E-02 |
| 216148 | Shc2     | SHC (Src homology 2 domain containing) transforming protein 2                          | 1,63 | 9,15E-04 | 1,40 | 2,64E-02 |
| 19091  | Prkg1    | protein kinase, cGMP-dependent, type I                                                 | 1,63 | 2,15E-02 | 1,62 | 1,97E-02 |
| 108927 | Lhfp     | lipoma HMGIC fusion partner                                                            | 1,63 | 1,06E-03 | 1,40 | 5,35E-03 |
| 98878  | Ehd4     | EH-domain containing 4                                                                 | 1,63 | 4,13E-04 | 1,63 | 2,37E-05 |
| 20350  | Sema3f   | sema domain, immunoglobulin domain (Ig), short basic domain, secreted, (semaphorin) 3F | 1,63 | 1,81E-02 | 1,46 | 4,70E-02 |
| 101359 | Prrt4    | proline-rich transmembrane protein 4                                                   | 1,63 | 2,23E-02 | 1,44 | 2,62E-03 |
| 17181  | Matn2    | matrilin 2                                                                             | 1,63 | 2,12E-04 | 1,50 | 1,68E-03 |
| 15958  | Ifit2    | interferon-induced protein with tetratricopeptide repeats 2                            | 1,63 | 6,25E-05 | 1,32 | 1,42E-03 |
| 13179  | Dcn      | decorin                                                                                | 1,63 | 7,24E-05 | 1,34 | 5,98E-04 |



|        |               |                                                                                               |      |                 |      |                 |
|--------|---------------|-----------------------------------------------------------------------------------------------|------|-----------------|------|-----------------|
| 140494 | Atp6v0a4      | ATPase, H+ transporting, lysosomal V0 subunit A4                                              | 1,63 | 1,43E-02        | 1,02 | 1,04E-01        |
| 93671  | Cd163         | CD163 antigen                                                                                 | 1,63 | 4,56E-02        | 1,44 | 2,14E-02        |
| 58916  | Myot          | myotilin                                                                                      | 1,63 | <b>4,19E-03</b> | 1,47 | 1,10E-02        |
| 16782  | Lamc2         | laminin, gamma 2                                                                              | 1,62 | 1,29E-02        | 1,50 | 3,77E-02        |
| 71653  | 4930506M07Rik | RIKEN cDNA 4930506M07 gene                                                                    | 1,62 | <b>8,84E-04</b> | 1,48 | <b>8,88E-03</b> |
| 217305 | Cd300ld       | CD300 molecule-like family member d                                                           | 1,62 | <b>4,23E-03</b> | 1,49 | <b>8,62E-03</b> |
| 12267  | C3ar1         | complement component 3a receptor 1                                                            | 1,62 | 2,77E-02        | 1,57 | 6,40E-02        |
| 18824  | Plp2          | proteolipid protein 2                                                                         | 1,62 | <b>3,31E-04</b> | 1,42 | <b>2,14E-04</b> |
| 668215 | 1500017E21Rik | RIKEN cDNA 1500017E21 gene                                                                    | 1,62 | <b>9,29E-04</b> | 1,49 | 2,14E-02        |
| 14396  | Gabra3        | gamma-aminobutyric acid (GABA) A receptor, subunit alpha 3                                    | 1,62 | 3,81E-02        | 1,58 | 1,76E-02        |
| 11746  | Anxa4         | annexin A4                                                                                    | 1,62 | <b>4,81E-04</b> | 1,37 | <b>4,81E-03</b> |
| 15460  | Hr            | hairless                                                                                      | 1,62 | 2,56E-02        | 1,62 | 2,46E-02        |
| 21938  | Tnfrsf1b      | tumor necrosis factor receptor superfamily, member 1b                                         | 1,62 | <b>3,25E-03</b> | 1,45 | <b>3,00E-03</b> |
| 11854  | Rhod          | ras homolog gene family, member D                                                             | 1,62 | 3,40E-02        | 1,81 | 1,77E-02        |
| 18573  | Pde1a         | phosphodiesterase 1A, calmodulin-dependent                                                    | 1,62 | 4,31E-02        | 1,29 | 1,69E-01        |
| 18733  | Lilrb3        | leukocyte immunoglobulin-like receptor, subfamily B (with TM and ITIM domains), member 3      | 1,62 | <b>8,96E-03</b> | 1,50 | 1,52E-02        |
| 16980  | Lrrn2         | leucine rich repeat protein 2, neuronal                                                       | 1,62 | 2,69E-02        | 1,46 | 3,87E-02        |
| 17216  | Mcm2          | minichromosome maintenance deficient 2 mitotin ( <i>S. cerevisiae</i> )                       | 1,62 | 3,13E-02        | 1,87 | <b>7,42E-03</b> |
| 69183  | C1qtnf2       | C1q and tumor necrosis factor related protein 2                                               | 1,62 | <b>5,39E-03</b> | 1,60 | 1,10E-02        |
| 64074  | Smoc2         | SPARC related modular calcium binding 2                                                       | 1,62 | <b>6,88E-04</b> | 1,47 | <b>4,70E-04</b> |
| 19224  | Ptgs1         | prostaglandin-endoperoxide synthase 1                                                         | 1,61 | <b>2,37E-04</b> | 1,45 | <b>5,73E-04</b> |
| 105245 | Txndc5        | thioredoxin domain containing 5                                                               | 1,61 | <b>5,18E-04</b> | 1,44 | <b>2,63E-03</b> |
| 104027 | Synpo         | synaptopodin                                                                                  | 1,61 | <b>9,49E-03</b> | 1,45 | 1,90E-02        |
| 26382  | Fgd2          | FYVE, RhoGEF and PH domain containing 2                                                       | 1,61 | 3,59E-02        | 1,40 | 6,80E-02        |
| 24055  | Sh3bp2        | SH3-domain binding protein 2                                                                  | 1,61 | <b>9,66E-03</b> | 1,51 | <b>7,13E-03</b> |
| 15200  | Hbegf         | heparin-binding EGF-like growth factor                                                        | 1,61 | <b>9,06E-04</b> | 1,34 | <b>1,81E-03</b> |
| 74782  | Glt8d2        | glycosyltransferase 8 domain containing 2                                                     | 1,61 | 4,02E-02        | 1,34 | 1,20E-01        |
| 13733  | Emr1          | EGF-like module containing, mucin-like, hormone receptor-like sequence 1                      | 1,61 | <b>2,32E-03</b> | 1,46 | <b>7,47E-03</b> |
| 74039  | Nfam1         | Nfat activating molecule with ITAM motif 1                                                    | 1,61 | <b>5,25E-03</b> | 1,62 | <b>1,76E-03</b> |
| 69399  | 1700025G04Rik | RIKEN cDNA 1700025G04 gene                                                                    | 1,61 | <b>1,21E-04</b> | 1,47 | <b>2,49E-04</b> |
| 20970  | Sdc3          | syndecan 3                                                                                    | 1,61 | <b>1,76E-03</b> | 1,44 | 1,62E-02        |
| 12831  | Col5a1        | collagen, type V, alpha 1                                                                     | 1,61 | <b>2,86E-03</b> | 1,45 | <b>2,20E-03</b> |
| 13385  | Dlg4          | discs, large homolog 4 ( <i>Drosophila</i> )                                                  | 1,61 | 2,39E-02        | 1,29 | 1,36E-01        |
| 71911  | Bdh1          | 3-hydroxybutyrate dehydrogenase, type 1                                                       | 1,61 | <b>5,73E-04</b> | 1,67 | <b>5,62E-04</b> |
| 78892  | Crispld2      | cysteine-rich secretory protein LCCL domain containing 2                                      | 1,61 | <b>8,63E-04</b> | 1,45 | <b>1,19E-04</b> |
| 13198  | Ddit3         | DNA-damage inducible transcript 3                                                             | 1,61 | <b>9,13E-03</b> | 1,50 | 1,68E-02        |
| 17916  | Myo1f         | myosin IF                                                                                     | 1,61 | 1,63E-02        | 1,52 | 2,75E-02        |
| 216161 | Sbno2         | strawberry notch homolog 2 ( <i>Drosophila</i> )                                              | 1,61 | <b>1,36E-03</b> | 1,33 | <b>6,81E-03</b> |
| 227737 | Fam129b       | family with sequence similarity 129, member B                                                 | 1,61 | <b>1,00E-03</b> | 1,44 | <b>4,46E-03</b> |
| 64103  | Tnmd          | tenomodulin                                                                                   | 1,61 | 4,35E-02        | 1,26 | 1,79E-01        |
| 233571 | P2ry6         | pyrimidineric receptor P2Y, G-protein coupled, 6                                              | 1,61 | <b>9,52E-03</b> | 1,51 | 2,10E-02        |
| 68659  | Fam198b       | family with sequence similarity 198, member B                                                 | 1,61 | <b>3,58E-04</b> | 1,34 | <b>5,33E-03</b> |
| 211480 | Kcnj14        | potassium inwardly-rectifying channel, subfamily J, member 14                                 | 1,60 | 1,32E-02        | 1,64 | <b>3,04E-03</b> |
| 15900  | Irf8          | interferon regulatory factor 8                                                                | 1,60 | 1,40E-02        | 1,63 | <b>3,72E-03</b> |
| 12490  | Cd34          | CD34 antigen                                                                                  | 1,60 | <b>1,16E-03</b> | 1,28 | 1,92E-02        |
| 114332 | Lyve1         | lymphatic vessel endothelial hyaluronan receptor 1                                            | 1,60 | 1,55E-02        | 1,53 | <b>8,19E-03</b> |
| 12409  | Cbr2          | carbonyl reductase 2                                                                          | 1,60 | 3,75E-02        | 1,46 | 4,18E-02        |
| 170743 | Tlr7          | toll-like receptor 7                                                                          | 1,60 | <b>2,47E-03</b> | 1,31 | 4,82E-02        |
| 14049  | Eya2          | eyes absent 2 homolog ( <i>Drosophila</i> )                                                   | 1,60 | <b>9,61E-03</b> | 1,58 | <b>4,10E-04</b> |
| 69806  | Slc39a11      | solute carrier family 39 (metal ion transporter), member 11                                   | 1,60 | <b>6,23E-03</b> | 1,31 | 1,34E-02        |
| 28077  | Med10         | mediator of RNA polymerase II transcription, subunit 10 homolog (NUT2, <i>S. cerevisiae</i> ) | 1,60 | <b>1,73E-03</b> | 1,55 | <b>2,34E-03</b> |
| 59126  | Nek6          | NIMA (never in mitosis gene a)-related expressed kinase 6                                     | 1,60 | 2,76E-02        | 1,60 | 4,12E-02        |
| 73106  | Prss57        | protease, serine 57                                                                           | 1,59 | <b>4,70E-03</b> | 1,32 | <b>4,79E-03</b> |
| 12428  | Ccna2         | cyclin A2                                                                                     | 1,59 | 1,29E-02        | 1,25 | 1,16E-01        |
| 20657  | Sod3          | superoxide dismutase 3, extracellular                                                         | 1,59 | <b>4,99E-03</b> | 1,62 | <b>8,35E-05</b> |
| 66098  | Chchd6        | coiled-coil-helix-coiled-coil-helix domain containing 6                                       | 1,59 | <b>6,44E-03</b> | 1,54 | <b>6,86E-03</b> |
| 12721  | Coro1a        | coronin, actin binding protein 1A                                                             | 1,59 | 3,31E-02        | 1,37 | 9,72E-02        |
| 12363  | Casp4         | caspase 4, apoptosis-related cysteine peptidase                                               | 1,59 | <b>2,71E-05</b> | 1,39 | <b>6,97E-04</b> |
| 110595 | Timp4         | tissue inhibitor of metalloproteinase 4                                                       | 1,59 | 3,38E-02        | 1,14 | 4,81E-01        |
| 13058  | Cybb          | cytochrome b-245, beta polypeptide                                                            | 1,59 | 2,12E-02        | 1,40 | 6,08E-02        |
| 22151  | Tubb2a        | tubulin, beta 2A class IIA                                                                    | 1,59 | <b>2,27E-03</b> | 1,37 | <b>5,27E-04</b> |
| 26360  | Angptl2       | angiopoietin-like 2                                                                           | 1,59 | <b>4,89E-04</b> | 1,36 | <b>5,15E-03</b> |
| 72982  | Tmem138       | transmembrane protein 138                                                                     | 1,59 | 3,32E-02        | 1,17 | 3,09E-01        |
| 68525  | Evc2          | Ellis van Creveld syndrome 2                                                                  | 1,59 | <b>1,11E-03</b> | 1,52 | <b>1,88E-03</b> |
| 66172  | Med11         | mediator of RNA polymerase II transcription, subunit 11 homolog ( <i>S. cerevisiae</i> )      | 1,59 | 2,95E-02        | 1,34 | 7,98E-02        |
| 85031  | Pla1a         | phospholipase A1 member A                                                                     | 1,59 | 2,04E-02        | 1,34 | 7,65E-02        |
| 20130  | Rras          | Harvey rat sarcoma oncogene, subgroup R                                                       | 1,58 | <b>1,87E-04</b> | 1,33 | <b>7,30E-04</b> |

|           |               |                                                                                     |      |                 |             |                 |
|-----------|---------------|-------------------------------------------------------------------------------------|------|-----------------|-------------|-----------------|
| 18102     | Nme1          | NME/NM23 nucleoside diphosphate kinase 1                                            | 1,58 | 2,89E-02        | 1,47        | 3,62E-02        |
| 66832     | Rsph3a        | radial spoke 3A homolog (Chlamydomonas)                                             | 1,58 | <b>3,00E-03</b> | <b>2,55</b> | <b>1,36E-04</b> |
| 229600    | BC028528      | cDNA sequence BC028528                                                              | 1,58 | 1,94E-02        | 1,22        | 2,70E-01        |
| 20613     | Snai1         | snail homolog 1 (Drosophila)                                                        | 1,58 | 1,88E-02        | 1,53        | 2,14E-02        |
| 21346     | Tagln2        | transgelin 2                                                                        | 1,58 | <b>1,76E-05</b> | 1,41        | <b>1,34E-04</b> |
| 216505    | Pik3ip1       | phosphoinositide-3-kinase interacting protein 1                                     | 1,58 | <b>5,17E-03</b> | 1,51        | <b>6,72E-03</b> |
| 100504114 | Gm16907       | predicted gene, 16907                                                               | 1,58 | 1,11E-02        | 1,37        | 6,98E-02        |
| 68166     | Spire1        | spire homolog 1 (Drosophila)                                                        | 1,58 | <b>6,85E-03</b> | 1,40        | <b>2,60E-03</b> |
| 50795     | Sh3bgr        | SH3-binding domain glutamic acid-rich protein                                       | 1,58 | <b>1,15E-04</b> | 1,49        | <b>1,12E-04</b> |
| 320092    | E030003E18Rik | RIKEN cDNA E030003E18 gene                                                          | 1,58 | <b>1,94E-04</b> | 1,22        | 8,09E-02        |
| 207565    | Camkk2        | calcium/calmodulin-dependent protein kinase kinase 2, beta                          | 1,57 | <b>1,35E-03</b> | 1,58        | <b>1,34E-03</b> |
| 242608    | Podn          | podocan                                                                             | 1,57 | 1,22E-02        | 1,39        | 1,13E-02        |
| 11853     | Rhoc          | ras homolog gene family, member C                                                   | 1,57 | <b>1,07E-03</b> | 1,43        | <b>2,82E-03</b> |
| 19340     | Rab3d         | RAB3D, member RAS oncogene family                                                   | 1,57 | <b>2,14E-04</b> | 1,41        | <b>1,93E-03</b> |
| 114584    | Clic1         | chloride intracellular channel 1                                                    | 1,57 | <b>1,59E-03</b> | 1,32        | <b>1,08E-04</b> |
| 67513     | 2610002J02Rik | RIKEN cDNA 2610002J02 gene                                                          | 1,57 | <b>2,08E-03</b> | 1,37        | 1,04E-02        |
| 81896     | Ift122        | intraflagellar transport 122                                                        | 1,57 | <b>4,64E-03</b> | 1,40        | 1,28E-02        |
| 58804     | Cdc42ep5      | CDC42 effector protein (Rho GTPase binding) 5                                       | 1,57 | <b>2,88E-03</b> | 1,53        | 2,42E-02        |
| 81904     | Cacng7        | calcium channel, voltage-dependent, gamma subunit 7                                 | 1,57 | 3,93E-02        | 1,79        | 2,60E-02        |
| 12517     | Cd72          | CD72 antigen                                                                        | 1,57 | 1,51E-02        | 1,46        | 3,46E-02        |
| 53886     | Cdk12         | cyclin-dependent kinase-like 2 (CDC2-related kinase)                                | 1,57 | <b>1,42E-03</b> | 1,44        | <b>2,11E-03</b> |
| 100038882 | Isg15         | ISG15 ubiquitin-like modifier                                                       | 1,57 | <b>3,33E-03</b> | 1,45        | <b>1,38E-03</b> |
| 104759    | Pld4          | phospholipase D family, member 4                                                    | 1,57 | <b>6,31E-04</b> | 1,52        | 1,24E-02        |
| 102442    | Dennd4a       | DENN/MADD domain containing 4A                                                      | 1,57 | <b>3,15E-03</b> | 1,26        | 9,02E-02        |
| 106512    | Gpsm3         | G-protein signalling modulator 3 (AGS3-like, C. elegans)                            | 1,57 | <b>6,50E-04</b> | 1,64        | <b>5,55E-03</b> |
| 14107     | Fat1          | FAT tumor suppressor homolog 1 (Drosophila)                                         | 1,56 | <b>1,38E-03</b> | 1,37        | <b>5,79E-03</b> |
| 106585    | Ankrd12       | ankyrin repeat domain 12                                                            | 1,56 | <b>6,79E-04</b> | 1,35        | 3,86E-02        |
| 214305    | Hhip1         | hedgehog interacting protein-like 1                                                 | 1,56 | 2,22E-02        | 1,35        | 4,65E-02        |
| 12834     | Col6a2        | collagen, type VI, alpha 2                                                          | 1,56 | <b>3,47E-03</b> | 1,43        | 1,39E-02        |
| 69581     | Rhou          | ras homolog gene family, member U                                                   | 1,56 | 3,26E-02        | 1,53        | 4,21E-02        |
| 13024     | Ctla2a        | cytotoxic T lymphocyte-associated protein 2 alpha                                   | 1,56 | <b>2,83E-04</b> | 1,28        | <b>1,88E-03</b> |
| 211550    | Tifa          | TRAF-interacting protein with forkhead-associated domain                            | 1,56 | <b>6,16E-05</b> | 1,48        | <b>2,39E-03</b> |
| 194126    | Mtmr11        | myotubularin related protein 11                                                     | 1,56 | 2,30E-02        | 1,28        | 8,86E-02        |
| 107029    | Me2           | malic enzyme 2, NAD(+)-dependent, mitochondrial                                     | 1,56 | <b>3,18E-03</b> | 1,52        | <b>4,27E-03</b> |
| 21813     | Tgfb2         | transforming growth factor, beta receptor II                                        | 1,56 | <b>3,77E-04</b> | 1,39        | <b>1,55E-05</b> |
| 11750     | Anxa7         | annexin A7                                                                          | 1,55 | <b>2,16E-03</b> | 1,41        | <b>4,42E-03</b> |
| 13051     | Cx3cr1        | chemokine (C-X3-C) receptor 1                                                       | 1,55 | 1,50E-02        | 1,47        | 2,94E-02        |
| 72560     | Naalad2       | N-acetylated alpha-linked acidic dipeptidase 2                                      | 1,55 | <b>3,58E-04</b> | 1,42        | <b>2,18E-04</b> |
| 53318     | Pdlim3        | PDZ and LIM domain 3                                                                | 1,55 | 1,15E-02        | 1,35        | 6,44E-02        |
| 234577    | Cpne2         | copine II                                                                           | 1,55 | <b>7,39E-04</b> | 1,50        | <b>3,07E-04</b> |
| 21366     | Slc6a6        | solute carrier family 6 (neurotransmitter transporter, taurine), member 6           | 1,55 | 3,13E-02        | 1,47        | 2,06E-02        |
| 66251     | Arfgap3       | ADP-ribosylation factor GTPase activating protein 3                                 | 1,55 | <b>1,83E-04</b> | 1,37        | 1,29E-02        |
| 208177    | Phldb2        | pleckstrin homology-like domain, family B, member 2                                 | 1,55 | <b>3,17E-03</b> | 1,40        | <b>3,19E-04</b> |
| 73723     | Sh3bgrl3      | SH3 domain binding glutamic acid-rich protein-like 3                                | 1,55 | <b>1,06E-03</b> | 1,43        | <b>1,43E-03</b> |
| 11745     | Anxa3         | annexin A3                                                                          | 1,55 | <b>3,00E-03</b> | 1,36        | 2,17E-02        |
| 12495     | Entpd1        | ectonucleoside triphosphate diphosphohydrolase 1                                    | 1,55 | <b>4,96E-03</b> | 1,28        | <b>2,08E-03</b> |
| 22038     | Plscr1        | phospholipid scramblase 1                                                           | 1,55 | <b>6,55E-03</b> | 1,24        | 7,08E-02        |
| 14773     | Grk5          | G protein-coupled receptor kinase 5                                                 | 1,55 | <b>3,03E-04</b> | 1,27        | <b>9,61E-03</b> |
| 227620    | Uap1l1        | UDP-N-acetylglucosamine pyrophosphorylase 1-like 1                                  | 1,55 | 2,05E-02        | 1,55        | 1,93E-02        |
| 12266     | C3            | complement component 3                                                              | 1,55 | 2,14E-02        | 1,54        | 3,72E-02        |
| 69745     | Pold4         | polymerase (DNA-directed), delta 4                                                  | 1,54 | <b>1,17E-03</b> | 1,27        | 1,30E-02        |
| 17918     | Myo5a         | myosin VA                                                                           | 1,54 | <b>1,90E-03</b> | 1,48        | <b>1,19E-04</b> |
| 83490     | Pik3ap1       | phosphoinositide-3-kinase adaptor protein 1                                         | 1,54 | <b>4,16E-03</b> | 1,27        | 2,99E-02        |
| 319939    | Tns3          | tensin 3                                                                            | 1,54 | <b>9,13E-03</b> | 1,43        | 2,71E-02        |
| 58809     | Rnase4        | ribonuclease, RNase A family 4                                                      | 1,54 | <b>2,51E-04</b> | 1,29        | 1,03E-02        |
| 11881     | Arsb          | arylsulfatase B                                                                     | 1,54 | <b>4,07E-04</b> | 1,29        | <b>2,92E-03</b> |
| 17969     | Ncf1          | neutrophil cytosolic factor 1                                                       | 1,54 | <b>9,31E-03</b> | 1,62        | <b>1,87E-03</b> |
| 56615     | Mgst1         | microsomal glutathione S-transferase 1                                              | 1,54 | 3,06E-02        | 1,52        | 2,05E-02        |
| 66455     | Cnpy4         | canopy 4 homolog (zebrafish)                                                        | 1,54 | 4,14E-02        | 1,14        | 3,52E-01        |
| 83691     | Crispld1      | cysteine-rich secretory protein LCCL domain containing 1                            | 1,54 | 1,00E-02        | 1,05        | 2,94E-01        |
| 74145     | F13a1         | coagulation factor XIII, A1 subunit                                                 | 1,54 | 4,55E-02        | 1,51        | 1,88E-02        |
| 18763     | Pkd1          | polycystic kidney disease 1 homolog                                                 | 1,54 | <b>1,90E-04</b> | 1,26        | 5,99E-02        |
| 14456     | Gas6          | growth arrest specific 6                                                            | 1,54 | <b>1,17E-03</b> | 1,49        | <b>2,31E-05</b> |
| 53376     | Usp2          | ubiquitin specific peptidase 2                                                      | 1,54 | 2,29E-02        | 1,50        | 2,77E-02        |
| 68567     | Cgref1        | cell growth regulator with EF hand domain 1                                         | 1,54 | <b>6,23E-03</b> | 1,24        | 5,17E-02        |
| 68235     | 2410066E13Rik | RIKEN cDNA 2410066E13 gene                                                          | 1,54 | 1,50E-02        | 1,21        | 1,57E-01        |
| 665155    | Srp54b        | signal recognition particle 54B                                                     | 1,54 | 2,97E-02        | 1,86        | 1,20E-02        |
| 171212    | Galnt10       | UDP-N-acetyl-alpha-D-galactosamine:polypeptide N-acetylgalactosaminyltransferase 10 | 1,54 | <b>3,25E-04</b> | 1,23        | 1,08E-02        |

|        |               |                                                                                              |      |          |      |          |
|--------|---------------|----------------------------------------------------------------------------------------------|------|----------|------|----------|
| 16909  | Lmo2          | LIM domain only 2                                                                            | 1,54 | 8,31E-03 | 1,69 | 6,50E-04 |
| 212974 | Ath11         | ATH1, acid trehalase-like 1 (yeast)                                                          | 1,54 | 4,33E-02 | 1,37 | 9,80E-02 |
| 19200  | Pstpip1       | proline-serine-threonine phosphatase-interacting protein 1                                   | 1,53 | 4,36E-03 | 1,33 | 8,59E-02 |
| 72061  | 2010111I01Rik | RIKEN cDNA 2010111I01 gene                                                                   | 1,53 | 9,39E-04 | 1,39 | 7,34E-03 |
| 16010  | Igfbp4        | insulin-like growth factor binding protein 4                                                 | 1,53 | 7,54E-04 | 1,62 | 1,86E-03 |
| 73720  | Cst6          | cystatin E/M                                                                                 | 1,53 | 7,97E-03 | 1,50 | 1,25E-02 |
| 73914  | Irak3         | interleukin-1 receptor-associated kinase 3                                                   | 1,53 | 1,36E-03 | 1,37 | 9,53E-03 |
| 18950  | Pnp           | purine-nucleoside phosphorylase                                                              | 1,53 | 1,27E-02 | 1,19 | 1,05E-01 |
| 22793  | Zyx           | zyxin                                                                                        | 1,53 | 4,47E-04 | 1,32 | 3,93E-03 |
| 230751 | Oscp1         | organic solute carrier partner 1                                                             | 1,53 | 5,82E-03 | 1,60 | 3,23E-04 |
| 66815  | Ccdc109b      | coiled-coil domain containing 109B                                                           | 1,53 | 1,19E-02 | 1,23 | 1,18E-01 |
| 330177 | Taok3         | TAO kinase 3                                                                                 | 1,53 | 5,47E-03 | 1,35 | 2,16E-02 |
| 16319  | Incenp        | inner centromere protein                                                                     | 1,53 | 1,09E-02 | 1,70 | 6,47E-05 |
| 19084  | Prkar1a       | protein kinase, cAMP dependent regulatory, type I, alpha                                     | 1,53 | 2,58E-03 | 1,51 | 1,36E-03 |
| 29818  | Hspb7         | heat shock protein family, member 7 (cardiovascular)                                         | 1,53 | 2,63E-03 | 1,44 | 3,24E-03 |
| 78560  | Gpr124        | G protein-coupled receptor 124                                                               | 1,53 | 8,39E-04 | 1,46 | 1,20E-03 |
| 373864 | Col27a1       | collagen, type XXVII, alpha 1                                                                | 1,53 | 8,81E-04 | 1,22 | 3,48E-02 |
| 74122  | Tmem43        | transmembrane protein 43                                                                     | 1,53 | 3,01E-04 | 1,35 | 1,30E-04 |
| 100740 | AI839979      | expressed sequence AI839979                                                                  | 1,53 | 2,45E-02 | 1,22 | 1,37E-01 |
| 118453 | Mmp28         | matrix metalloproteinase 28 (epilysin)                                                       | 1,53 | 1,60E-03 | 1,25 | 1,36E-01 |
| 338367 | Myo1d         | myosin ID                                                                                    | 1,53 | 3,22E-03 | 1,20 | 9,12E-02 |
| 14538  | Gcnt2         | glucosaminyl (N-acetyl) transferase 2, I-branching enzyme                                    | 1,53 | 2,03E-03 | 1,25 | 2,75E-02 |
| 17294  | Mest          | mesoderm specific transcript                                                                 | 1,53 | 1,65E-02 | 1,25 | 1,12E-01 |
| 18414  | Osmr          | oncostatin M receptor                                                                        | 1,53 | 3,93E-03 | 1,19 | 1,39E-01 |
| 66578  | Mis18a        | MIS18 kinetochore protein homolog A (S. pombe)                                               | 1,53 | 5,47E-03 | 1,33 | 2,49E-02 |
| 12273  | C5ar1         | complement component 5a receptor 1                                                           | 1,53 | 3,64E-02 | 1,54 | 2,90E-03 |
| 21939  | Cd40          | CD40 antigen                                                                                 | 1,53 | 2,91E-02 | 1,48 | 4,85E-02 |
| 211770 | Trib1         | tribbles homolog 1 (Drosophila)                                                              | 1,53 | 1,15E-02 | 1,36 | 2,93E-02 |
| 268739 | Arhgef40      | Rho guanine nucleotide exchange factor (GEF) 40                                              | 1,53 | 1,14E-02 | 1,35 | 3,01E-02 |
| 244216 | Zfp771        | zinc finger protein 771                                                                      | 1,52 | 6,53E-02 | 3,58 | 1,11E-03 |
| 117606 | Boc           | biregional cell adhesion molecule-related/down-regulated by oncogenes (Cdon) binding protein | 1,52 | 9,85E-03 | 1,31 | 4,68E-02 |
| 71710  | Lrrcc1        | leucine rich repeat and coiled-coil domain containing 1                                      | 1,52 | 4,45E-04 | 1,32 | 1,23E-02 |
| 329739 | Fam102b       | family with sequence similarity 102, member B                                                | 1,52 | 2,95E-03 | 1,26 | 1,85E-02 |
| 93677  | Lmod2         | leiomodulin 2 (cardiac)                                                                      | 1,52 | 1,25E-02 | 1,47 | 5,61E-03 |
| 13010  | Cst3          | cystatin C                                                                                   | 1,52 | 9,49E-04 | 1,47 | 1,55E-03 |
| 23830  | Capn10        | calpain 10                                                                                   | 1,52 | 6,23E-04 | 1,45 | 3,51E-04 |
| 50908  | C1s           | complement component 1, s subcomponent                                                       | 1,52 | 7,07E-05 | 1,32 | 5,22E-04 |
| 12982  | Csf2ra        | colony stimulating factor 2 receptor, alpha, low-affinity (granulocyte-macrophage)           | 1,52 | 7,70E-02 | 1,75 | 4,09E-02 |
| 94280  | Sfxn3         | sideroflexin 3                                                                               | 1,52 | 2,46E-03 | 1,36 | 4,28E-03 |
| 66120  | Fkbp11        | FK506 binding protein 11                                                                     | 1,52 | 9,46E-03 | 1,52 | 1,79E-02 |
| 71962  | Gatsl3        | GATS protein-like 3                                                                          | 1,52 | 2,82E-02 | 1,03 | 7,81E-01 |
| 213211 | Rnf26         | ring finger protein 26                                                                       | 1,52 | 2,82E-03 | 1,38 | 1,09E-02 |
| 16478  | Jund          | Jun proto-oncogene related gene d                                                            | 1,52 | 1,25E-03 | 2,65 | 1,49E-05 |
| 216445 | Arhgap9       | Rho GTPase activating protein 9                                                              | 1,52 | 1,09E-01 | 2,16 | 1,49E-02 |
| 76561  | Snx7          | sorting nexin 7                                                                              | 1,52 | 2,62E-02 | 1,42 | 3,73E-02 |
| 17925  | Myo9b         | myosin IXb                                                                                   | 1,52 | 4,05E-04 | 1,32 | 4,41E-02 |
| 66775  | Ptplad2       | protein tyrosine phosphatase-like A domain containing 2                                      | 1,52 | 3,61E-03 | 1,27 | 2,82E-02 |
| 18217  | Ntsr2         | neurotensin receptor 2                                                                       | 1,52 | 1,15E-02 | 1,45 | 1,02E-02 |
| 72361  | Ces2g         | carboxylesterase 2G                                                                          | 1,52 | 8,85E-03 | 1,26 | 8,13E-02 |
| 16414  | Itgb2         | integrin beta 2                                                                              | 1,52 | 1,25E-02 | 1,30 | 7,42E-02 |
| 170706 | Tmem37        | transmembrane protein 37                                                                     | 1,52 | 4,62E-02 | 1,36 | 8,70E-02 |
| 140559 | Igsf8         | immunoglobulin superfamily, member 8                                                         | 1,52 | 5,97E-03 | 1,48 | 7,59E-03 |
| 105785 | Kdelr3        | KDEL (Lys-Asp-Glu-Leu) endoplasmic reticulum protein retention receptor 3                    | 1,52 | 1,25E-02 | 1,27 | 8,42E-02 |
| 58207  | Slc43a3       | solute carrier family 43, member 3                                                           | 1,52 | 3,38E-02 | 1,17 | 2,40E-01 |
| 14739  | S1pr2         | sphingosine-1-phosphate receptor 2                                                           | 1,51 | 9,37E-03 | 1,37 | 2,67E-04 |
| 63954  | Rbp7          | retinol binding protein 7, cellular                                                          | 1,51 | 1,56E-02 | 1,27 | 7,68E-02 |
| 13590  | Lefty1        | left right determination factor 1                                                            | 1,51 | 4,64E-02 | 1,27 | 7,38E-02 |
| 14695  | Gnb3          | guanine nucleotide binding protein (G protein), beta 3                                       | 1,51 | 2,99E-03 | 1,53 | 2,16E-02 |
| 15903  | Id3           | inhibitor of DNA binding 3                                                                   | 1,51 | 2,02E-03 | 1,44 | 3,17E-03 |
| 226652 | Arhgap30      | Rho GTPase activating protein 30                                                             | 1,51 | 9,10E-03 | 1,49 | 6,86E-03 |
| 192173 | Fam195b       | family with sequence similarity 195, member B                                                | 1,51 | 1,17E-03 | 1,30 | 9,73E-03 |
| 19075  | Prim1         | DNA primase, p49 subunit                                                                     | 1,51 | 8,36E-03 | 1,67 | 1,25E-02 |
| 97130  | C77080        | expressed sequence C77080                                                                    | 1,51 | 2,87E-03 | 1,24 | 1,10E-01 |
| 71904  | Paqr7         | progesterone and adiponectin receptor family member VII                                      | 1,51 | 2,16E-02 | 1,48 | 1,27E-02 |
| 20425  | Shmt1         | serine hydroxymethyltransferase 1 (soluble)                                                  | 1,51 | 2,05E-02 | 1,87 | 6,79E-04 |
| 83396  | Glis2         | GLIS family zinc finger 2                                                                    | 1,51 | 1,22E-02 | 1,30 | 4,28E-02 |
| 17130  | Smad6         | SMAD family member 6                                                                         | 1,51 | 3,13E-02 | 1,96 | 5,93E-03 |
| 23853  | Def6          | differentially expressed in FDCP 6                                                           | 1,51 | 2,19E-02 | 1,39 | 4,35E-02 |

|        |               |                                                                                           |      |          |      |          |
|--------|---------------|-------------------------------------------------------------------------------------------|------|----------|------|----------|
| 74486  | Osbpl10       | oxysterol binding protein-like 10                                                         | 1,50 | 2,33E-02 | 1,23 | 1,73E-01 |
| 56264  | Cpxml         | carboxypeptidase X 1 (M14 family)                                                         | 1,50 | 4,01E-02 | 1,30 | 1,22E-01 |
| 18753  | Prkcd         | protein kinase C, delta                                                                   | 1,50 | 1,46E-03 | 1,41 | 5,39E-03 |
| 19038  | Ppic          | peptidylprolyl isomerase C                                                                | 1,50 | 1,39E-03 | 1,31 | 7,48E-03 |
| 69274  | Ctdspl        | CTD (carboxy-terminal domain, RNA polymerase II, polypeptide A)<br>small phosphatase-like | 1,50 | 5,14E-03 | 1,30 | 3,09E-02 |
| 16409  | Itgam         | integrin alpha M                                                                          | 1,50 | 2,64E-02 | 1,59 | 1,09E-02 |
| 14451  | Gas1          | growth arrest specific 1                                                                  | 1,50 | 7,98E-04 | 1,59 | 1,03E-02 |
| 19219  | Ptger4        | prostaglandin E receptor 4 (subtype EP4)                                                  | 1,50 | 5,43E-02 | 1,51 | 3,16E-02 |
| 109900 | Asl           | argininosuccinate lyase                                                                   | 1,49 | 1,87E-02 | 1,55 | 1,95E-02 |
| 22371  | Vwf           | Von Willebrand factor homolog                                                             | 1,49 | 3,06E-03 | 1,74 | 5,88E-03 |
| 15205  | Hes1          | hairy and enhancer of split 1 (Drosophila)                                                | 1,49 | 2,80E-03 | 1,54 | 1,04E-03 |
| 17930  | Myom2         | myomesin 2                                                                                | 1,48 | 1,57E-03 | 1,51 | 1,42E-03 |
| 240514 | Ccdc85b       | coiled-coil domain containing 85B                                                         | 1,48 | 3,63E-02 | 2,03 | 3,70E-03 |
| 193280 | C030037D09Rik | RIKEN cDNA C030037D09 gene                                                                | 1,48 | 5,44E-02 | 1,67 | 3,09E-02 |
| 68612  | Ube2c         | ubiquitin-conjugating enzyme E2C                                                          | 1,47 | 5,06E-02 | 1,73 | 1,18E-02 |
| 17160  | Man2b2        | mannosidase 2, alpha B2                                                                   | 1,47 | 5,30E-03 | 1,54 | 2,22E-03 |
| 13346  | Des           | desmin                                                                                    | 1,46 | 8,20E-04 | 1,61 | 2,53E-04 |
| 66391  | 2310061J03Rik | RIKEN cDNA 2310061J03 gene                                                                | 1,46 | 6,91E-02 | 2,30 | 4,11E-04 |
| 17131  | Smad7         | SMAD family member 7                                                                      | 1,46 | 2,26E-02 | 1,66 | 1,53E-02 |
| 17357  | Marcks1l      | MARCKS-like 1                                                                             | 1,46 | 1,65E-02 | 1,63 | 3,29E-03 |
| 21391  | Tbxas1        | thromboxane A synthase 1, platelet                                                        | 1,46 | 3,41E-02 | 1,66 | 1,18E-02 |
| 78926  | Gas2l1        | growth arrest-specific 2 like 1                                                           | 1,45 | 1,25E-03 | 1,51 | 2,84E-04 |
| 19290  | Pura          | purine rich element binding protein A                                                     | 1,44 | 5,53E-04 | 1,87 | 3,04E-04 |
| 55950  | Bri3          | brain protein I3                                                                          | 1,44 | 5,42E-05 | 1,82 | 9,78E-05 |
| 17153  | Mal           | myelin and lymphocyte protein, T cell differentiation protein                             | 1,43 | 1,30E-02 | 1,67 | 5,21E-05 |
| 69386  | Hist1h4h      | histone cluster 1, H4h                                                                    | 1,42 | 2,39E-02 | 2,10 | 5,75E-04 |
| 76900  | Ssbp4         | single stranded DNA binding protein 4                                                     | 1,42 | 1,17E-02 | 1,57 | 2,65E-03 |
| 235599 | 6430571L13Rik | RIKEN cDNA 6430571L13 gene                                                                | 1,42 | 5,10E-02 | 1,61 | 6,56E-03 |
| 17901  | Myl1          | myosin, light polypeptide 1                                                               | 1,40 | 8,13E-02 | 1,52 | 9,31E-03 |
| 269799 | Clec4a1       | C-type lectin domain family 4, member a1                                                  | 1,40 | 3,04E-03 | 1,55 | 3,98E-02 |
| 66330  | 1700020L24Rik | RIKEN cDNA 1700020L24 gene                                                                | 1,39 | 4,97E-02 | 1,56 | 2,79E-02 |
| 319192 | Hist2h2aa2    | histone cluster 2, H2aa2                                                                  | 1,39 | 5,85E-02 | 2,36 | 7,42E-03 |
| 19881  | Rom1          | rod outer segment membrane protein 1                                                      | 1,39 | 2,64E-07 | 1,59 | 2,38E-03 |
| 209268 | Igsf1         | immunoglobulin superfamily, member 1                                                      | 1,38 | 6,92E-02 | 1,55 | 2,53E-02 |
| 68209  | Rnaseh2c      | ribonuclease H2, subunit C                                                                | 1,38 | 5,06E-02 | 1,99 | 7,77E-03 |
| 19018  | Scand1        | SCAN domain-containing 1                                                                  | 1,38 | 2,90E-01 | 5,43 | 3,82E-03 |
| 171171 | Ntng2         | netrin G2                                                                                 | 1,37 | 7,93E-03 | 1,63 | 5,44E-04 |
| 15507  | Hspb1         | heat shock protein 1                                                                      | 1,37 | 1,20E-02 | 1,72 | 3,39E-04 |
| 67862  | 2310033P09Rik | RIKEN cDNA 2310033P09 gene                                                                | 1,37 | 3,82E-03 | 1,65 | 4,51E-04 |
| 74596  | Cds1          | CDP-diacylglycerol synthase 1                                                             | 1,37 | 3,43E-02 | 1,56 | 1,13E-02 |
| 232440 | H2afj         | H2A histone family, member J                                                              | 1,37 | 4,82E-02 | 2,28 | 2,27E-04 |
| 12561  | Cdh4          | cadherin 4                                                                                | 1,37 | 5,24E-02 | 1,59 | 3,30E-02 |
| 17533  | Mrc1          | mannose receptor, C type 1                                                                | 1,37 | 3,25E-02 | 1,50 | 1,83E-03 |
| 15248  | Hic1          | hypermethylated in cancer 1                                                               | 1,36 | 6,76E-02 | 1,64 | 2,28E-03 |
| 214951 | Rhbdl1        | rhomboid, veinlet-like 1 (Drosophila)                                                     | 1,36 | 9,28E-02 | 1,80 | 1,18E-03 |
| 60322  | Chst7         | carbohydrate (N-acetylglucosamino) sulfotransferase 7                                     | 1,35 | 6,39E-02 | 1,65 | 1,01E-02 |
| 13144  | Dapk3         | death-associated protein kinase 3                                                         | 1,34 | 5,07E-02 | 1,61 | 1,04E-02 |
| 19698  | Relb          | avian reticuloendotheliosis viral (v-rel) oncogene related B                              | 1,33 | 5,15E-02 | 1,52 | 9,70E-04 |
| 319748 | Zfp865        | zinc finger protein 865                                                                   | 1,33 | 1,36E-02 | 1,53 | 3,38E-03 |
| 14201  | Fhl3          | four and a half LIM domains 3                                                             | 1,32 | 5,35E-02 | 1,76 | 4,34E-03 |
| 68165  | Fdx1l         | ferredoxin 1-like                                                                         | 1,32 | 2,27E-02 | 1,51 | 6,39E-03 |
| 59036  | Dact1         | dapper homolog 1, antagonist of beta-catenin (xenopus)                                    | 1,32 | 7,02E-02 | 1,54 | 1,30E-02 |
| 213121 | Ankrd35       | ankyrin repeat domain 35                                                                  | 1,31 | 1,11E-02 | 1,57 | 3,40E-03 |
| 29805  | Znhit2        | zinc finger, HIT domain containing 2                                                      | 1,30 | 1,06E-01 | 1,57 | 2,34E-02 |
| 107771 | Bmyc          | brain expressed myelocytomatosis oncogene                                                 | 1,30 | 1,73E-01 | 1,72 | 3,47E-02 |
| 70083  | Metrn         | meteorin, glial cell differentiation regulator                                            | 1,30 | 4,44E-02 | 1,78 | 3,28E-03 |
| 56009  | Alyref2       | Aly/REF export factor 2                                                                   | 1,29 | 1,46E-01 | 1,58 | 3,31E-02 |
| 319180 | Hist1h2bf     | histone cluster 1, H2bf                                                                   | 1,25 | 2,57E-01 | 2,00 | 1,38E-02 |
| 16373  | Irx3          | Iroquois related homeobox 3 (Drosophila)                                                  | 1,25 | 3,27E-01 | 2,06 | 2,29E-02 |
| 320869 | 4732415M23Rik | RIKEN cDNA 4732415M23 gene                                                                | 1,24 | 1,17E-01 | 1,55 | 8,05E-03 |
| 69094  | Tmem160       | transmembrane protein 160                                                                 | 1,23 | 1,96E-01 | 1,55 | 4,03E-02 |
| 217219 | Fam171a2      | family with sequence similarity 171, member A2                                            | 1,23 | 1,64E-01 | 1,53 | 1,56E-02 |
| 14431  | Gamt          | guanidinoacetate methyltransferase                                                        | 1,22 | 1,41E-02 | 1,52 | 2,88E-03 |
| 67078  | Pgp           | phosphoglycolate phosphatase                                                              | 1,22 | 1,45E-01 | 1,92 | 5,69E-03 |
| 170770 | Bbc3          | BCL2 binding component 3                                                                  | 1,22 | 2,50E-01 | 1,55 | 4,71E-02 |
| 216622 | 4931440F15Rik | RIKEN cDNA 4931440F15 gene                                                                | 1,20 | 1,34E-02 | 1,67 | 7,75E-05 |
| 77127  | A930001A20Rik | RIKEN cDNA A930001A20 gene                                                                | 1,20 | 5,78E-01 | 8,93 | 3,53E-03 |
| 620695 | Gm13889       | predicted gene 13889                                                                      | 1,20 | 2,79E-01 | 1,58 | 2,82E-02 |
| 68431  | Fbx115        | F-box and leucine-rich repeat protein 15                                                  | 1,19 | 2,41E-01 | 2,10 | 4,46E-04 |

|             |               |                                                                                                               |       |          |       |          |
|-------------|---------------|---------------------------------------------------------------------------------------------------------------|-------|----------|-------|----------|
| 69372       | Mocs3         | molybdenum cofactor synthesis 3                                                                               | 1,18  | 3,38E-01 | 1,89  | 2,22E-02 |
| 12193       | Zfp3612       | zinc finger protein 36, C3H type-like 2                                                                       | 1,18  | 3,41E-02 | 1,51  | 2,72E-04 |
| 54352       | Irx5          | Iroquois related homeobox 5 (Drosophila)                                                                      | 1,18  | 4,62E-01 | 1,91  | 3,79E-02 |
| 75135       | 4930526I15Rik | RIKEN cDNA 4930526I15 gene                                                                                    | 1,17  | 1,81E-01 | 2,38  | 1,01E-03 |
| 19799       | Rn4.5s        | 4.5S RNA                                                                                                      | 1,17  | 6,78E-01 | 8,11  | 3,69E-05 |
| 12055       | Bcl7c         | B cell CLL/lymphoma 7C                                                                                        | 1,16  | 1,55E-01 | 1,53  | 8,94E-03 |
| 79044       | Mrps34        | mitochondrial ribosomal protein S34                                                                           | 1,15  | 1,38E-02 | 1,52  | 1,29E-04 |
| 69878       | Snrpf         | small nuclear ribonucleoprotein polypeptide F                                                                 | 1,13  | 2,53E-01 | 1,50  | 2,17E-02 |
| 232969      | Zfp428        | zinc finger protein 428                                                                                       | 1,12  | 4,76E-01 | 1,74  | 2,07E-02 |
| 16476       | Jun           | Jun oncogene                                                                                                  | 1,11  | 3,43E-01 | 1,51  | 4,51E-02 |
| 214616      | Spata511      | spermatogenesis associated 5-like 1                                                                           | 1,10  | 6,57E-01 | 2,09  | 2,20E-02 |
| 78108       | 4930414L22Rik | RIKEN cDNA 4930414L22 gene                                                                                    | 1,09  | 1,65E-01 | 1,66  | 1,24E-03 |
| 70350       | Baspl         | brain abundant, membrane attached signal protein 1                                                            | 1,08  | 3,74E-01 | 1,59  | 2,41E-02 |
| 13864       | Nr2f6         | nuclear receptor subfamily 2, group F, member 6                                                               | 1,08  | 3,90E-01 | 1,86  | 1,96E-05 |
| 14761       | Gpr27         | G protein-coupled receptor 27                                                                                 | 1,07  | 1,51E-01 | 2,71  | 6,32E-05 |
| 15166       | Hcn2          | hyperpolarization-activated, cyclic nucleotide-gated K+ 2                                                     | 1,07  | 1,95E-01 | 1,63  | 1,52E-03 |
| 21407       | Tcf15         | transcription factor 15                                                                                       | 1,06  | 6,68E-01 | 1,78  | 1,64E-03 |
| 246735      | AY074887      | cDNA sequence AY074887                                                                                        | 1,06  | 3,74E-01 | 2,03  | 1,13E-02 |
| 56222       | Cited4        | Cbp/p300-interacting transactivator, with Glu/Asp-rich carboxy-terminal domain, 4                             | 1,05  | 6,32E-01 | 1,61  | 3,10E-02 |
| 18091       | Nkx2-5        | NK2 transcription factor related, locus 5 (Drosophila)                                                        | 1,03  | 7,38E-01 | 1,65  | 5,72E-05 |
| 668158      | Ccdc85c       | coiled-coil domain containing 85C                                                                             | 1,01  | 8,91E-01 | 1,72  | 1,50E-04 |
| 13804       | Endog         | endonuclease G                                                                                                | 1,00  | 9,65E-01 | 1,76  | 1,24E-03 |
| 73951       | 4930413G21Rik | RIKEN cDNA 4930413G21 gene                                                                                    | -1,01 | 9,31E-01 | 2,25  | 3,57E-03 |
| 170942.chrY | Erdr1         | erythroid differentiation regulator 1                                                                         | -1,02 | 8,81E-01 | 2,91  | 2,00E-03 |
| 14173       | Fgf2          | fibroblast growth factor 2                                                                                    | -1,02 | 8,86E-01 | 1,56  | 3,98E-03 |
| 77134       | Hnrnpa0       | heterogeneous nuclear ribonucleoprotein A0                                                                    | -1,05 | 7,03E-01 | 1,55  | 2,39E-02 |
| 319587      | 4930539J05Rik | RIKEN cDNA 4930539J05 gene                                                                                    | -1,11 | 6,50E-01 | 3,27  | 3,40E-03 |
| 18617       | Rhox5         | reproductive homeobox 5                                                                                       | -1,13 | 4,89E-01 | -1,57 | 2,88E-02 |
| 17765       | Mtf2          | metal response element binding transcription factor 2                                                         | -1,30 | 4,57E-02 | -1,55 | 4,55E-03 |
| 67378       | Bbs2          | Bardet-Biedl syndrome 2 (human)                                                                               | -1,31 | 7,84E-03 | -1,51 | 1,85E-03 |
| 76365       | Tbx18         | T-box18                                                                                                       | -1,33 | 4,16E-02 | -1,64 | 8,81E-03 |
| 225594      | Gm4841        | predicted gene 4841                                                                                           | -1,34 | 4,78E-01 | -1,58 | 2,44E-02 |
| 69930       | Zfp715        | zinc finger protein 715                                                                                       | -1,34 | 5,73E-03 | -1,60 | 4,46E-04 |
| 16904       | Gzmm          | granzyme M (lymphocyte met-ase 1)                                                                             | -1,36 | 2,80E-02 | -1,51 | 8,79E-03 |
| 328186      | Gm10336       | predicted gene 10336                                                                                          | -1,37 | 3,61E-02 | -1,59 | 8,43E-03 |
| 12518       | Cd79a         | CD79A antigen (immunoglobulin-associated alpha)                                                               | -1,37 | 2,85E-02 | -1,55 | 2,15E-02 |
| 15950       | Ifi203        | interferon activated gene 203                                                                                 | -1,37 | 1,19E-02 | -1,54 | 1,88E-03 |
| 319615      | Zfp944        | zinc finger protein 944                                                                                       | -1,37 | 3,07E-02 | -1,54 | 1,21E-02 |
| 319613      | Sybu          | syntabulin (syntaxin-interacting)                                                                             | -1,38 | 5,87E-02 | -1,53 | 2,38E-02 |
| 432769      | Zfp708        | zinc finger protein 708                                                                                       | -1,40 | 3,39E-02 | -1,51 | 2,37E-02 |
| 70055       | 1700030L20Rik | RIKEN cDNA 1700030L20 gene                                                                                    | -1,40 | 1,03E-01 | -1,71 | 2,56E-02 |
| 66597       | Trim13        | tripartite motif-containing 13                                                                                | -1,40 | 8,52E-02 | -1,52 | 4,30E-02 |
| 70551       | Tmtc4         | transmembrane and tetratricopeptide repeat containing 4                                                       | -1,40 | 5,63E-02 | -1,53 | 3,22E-02 |
| 214137      | Arhgap29      | Rho GTPase activating protein 29                                                                              | -1,41 | 1,73E-03 | -1,53 | 4,56E-04 |
| 73316       | Calr3         | calreticulin 3                                                                                                | -1,41 | 1,04E-02 | -1,64 | 2,05E-03 |
| 70423       | Tspan15       | tetraspanin 15                                                                                                | -1,43 | 1,20E-02 | -1,52 | 5,79E-03 |
| 109934      | Abr           | active BCR-related gene                                                                                       | -1,43 | 1,79E-03 | -1,51 | 8,25E-04 |
| 101401      | Adamts9       | a disintegrin-like and metallopeptidase (reprolysin type) with thrombospondin type 1 motif, 9                 | -1,44 | 5,52E-02 | -1,51 | 5,30E-04 |
| 18105       | Nqo2          | NAD(P)H dehydrogenase, quinone 2                                                                              | -1,45 | 3,32E-04 | -1,51 | 1,57E-04 |
| 13134       | Dach1         | dachshund 1 (Drosophila)                                                                                      | -1,45 | 4,51E-03 | -1,56 | 2,28E-04 |
| 100233208   | Gm10778       | predicted gene 10778                                                                                          | -1,45 | 3,21E-03 | -1,58 | 4,11E-03 |
| 75712       | Tmem14a       | transmembrane protein 14A                                                                                     | -1,45 | 3,56E-02 | -1,63 | 2,02E-02 |
| 74670       | Zfp943        | zinc finger protein 943                                                                                       | -1,46 | 1,59E-03 | -1,61 | 3,03E-04 |
| 114676      | 4930519F09Rik | pyruvate dehydrogenase E1 alpha 1 pseudogene                                                                  | -1,46 | 1,15E-02 | -1,51 | 3,07E-02 |
| 21788       | Tfpi          | tissue factor pathway inhibitor                                                                               | -1,46 | 3,19E-03 | -1,58 | 1,31E-03 |
| 328949      | Mcc           | mutated in colorectal cancers                                                                                 | -1,47 | 1,05E-02 | -1,55 | 5,77E-03 |
| 237823      | Pfas          | phosphoribosylformylglycinamidine synthase (FGAR amidotransferase)                                            | -1,47 | 3,90E-03 | -1,53 | 2,80E-04 |
| 20447       | St6galnac3    | ST6 (alpha-N-acetyl-neuraminyl-2,3-beta-galactosyl-1,3)-N-acetylgalactosaminide alpha-2,6-sialyltransferase 3 | -1,47 | 2,94E-02 | -1,59 | 7,27E-03 |
| 73204       | 3110056K07Rik | RIKEN cDNA 3110056K07 gene                                                                                    | -1,48 | 3,26E-02 | -1,50 | 3,00E-02 |
| 14792       | Lpcat3        | lysophosphatidylcholine acyltransferase 3                                                                     | -1,48 | 1,03E-03 | -1,50 | 1,78E-04 |
| 13992       | Khdrs3        | KH domain containing, RNA binding, signal transduction associated 3                                           | -1,49 | 1,71E-03 | -1,53 | 8,09E-04 |
| 241289      | Ppp1r26       | protein phosphatase 1, regulatory subunit 26                                                                  | -1,50 | 9,07E-03 | -1,54 | 8,24E-03 |
| 329584      | Slc2a4rg-ps   | Slc2a4 regulator, pseudogene                                                                                  | -1,50 | 6,38E-03 | -1,67 | 2,34E-03 |
| 16763       | Lad1          | ladinin                                                                                                       | -1,50 | 6,98E-03 | -1,70 | 1,43E-03 |
| 93704       | Pcdhgb7       | protocadherin gamma subfamily B, 7                                                                            | -1,50 | 1,03E-02 | -1,42 | 1,42E-02 |
| 104349      | Zfp119a       | zinc finger protein 119a                                                                                      | -1,50 | 1,88E-02 | -1,35 | 5,16E-02 |
| 319582      | 6430573F11Rik | RIKEN cDNA 6430573F11 gene                                                                                    | -1,50 | 2,04E-02 | -1,44 | 8,88E-03 |

|           |               |                                                                                         |       |          |       |          |
|-----------|---------------|-----------------------------------------------------------------------------------------|-------|----------|-------|----------|
| 19329     | Rab17         | RAB17, member RAS oncogene family                                                       | -1,50 | 2,66E-02 | -1,39 | 7,70E-02 |
| 16542     | Kdr           | kinase insert domain protein receptor                                                   | -1,50 | 3,95E-03 | -1,47 | 4,85E-03 |
| 77864     | Ypel2         | yippee-like 2 (Drosophila)                                                              | -1,51 | 1,71E-03 | -1,48 | 4,92E-02 |
| 234728    | Ftsjd1        | FtsJ methyltransferase domain containing 1                                              | -1,51 | 7,26E-04 | -1,38 | 1,39E-02 |
| 11640     | Akap1         | A kinase (PRKA) anchor protein 1                                                        | -1,51 | 9,95E-05 | -1,32 | 5,69E-05 |
| 20928     | Abcc9         | ATP-binding cassette, sub-family C (CFTR/MRP), member 9                                 | -1,51 | 1,32E-05 | -1,49 | 1,82E-05 |
| 18784     | Pla2g5        | phospholipase A2, group V                                                               | -1,51 | 1,93E-02 | -1,15 | 7,17E-02 |
| 110880    | Scn4a         | sodium channel, voltage-gated, type IV, alpha                                           | -1,51 | 8,76E-03 | -1,28 | 1,79E-02 |
| 14198     | Fhit          | fragile histidine triad gene                                                            | -1,51 | 1,14E-02 | -1,26 | 2,10E-01 |
| 106869    | Tnfaip8       | tumor necrosis factor, alpha-induced protein 8                                          | -1,51 | 1,21E-03 | -1,31 | 7,28E-03 |
| 57279     | Slc25a20      | solute carrier family 25 (mitochondrial carnitine/acylcarnitine translocase), member 20 | -1,51 | 5,44E-05 | -1,34 | 2,73E-03 |
| 100662    | D930016D06Rik | RIKEN cDNA D930016D06 gene                                                              | -1,51 | 6,56E-03 | -1,81 | 1,11E-03 |
| 320091    | Ano4          | anoctamin 4                                                                             | -1,51 | 5,78E-03 | -1,15 | 1,73E-01 |
| 320635    | Cyb5r2        | cytochrome b5 reductase 2                                                               | -1,51 | 6,81E-03 | -1,41 | 1,14E-02 |
| 225049    | Ttc7          | tetratricopeptide repeat domain 7                                                       | -1,52 | 4,17E-04 | -1,45 | 6,19E-04 |
| 74488     | Lrrc15        | leucine rich repeat containing 15                                                       | -1,52 | 4,37E-04 | -1,36 | 6,63E-03 |
| 11624     | Ahrr          | aryl-hydrocarbon receptor repressor                                                     | -1,52 | 7,55E-04 | -1,42 | 9,71E-03 |
| 108682    | Gpt2          | glutamic pyruvate transaminase (alanine aminotransferase) 2                             | -1,52 | 6,02E-04 | -1,41 | 1,05E-03 |
| 104776    | Aldh6a1       | aldehyde dehydrogenase family 6, subfamily A1                                           | -1,52 | 1,67E-03 | -1,42 | 1,68E-02 |
| 75894     | Adal          | adenosine deaminase-like                                                                | -1,52 | 3,43E-03 | -1,57 | 2,14E-03 |
| 26457     | Slc27a1       | solute carrier family 27 (fatty acid transporter), member 1                             | -1,52 | 1,30E-03 | -1,43 | 8,93E-04 |
| 16780     | Lamb3         | laminin, beta 3                                                                         | -1,53 | 1,39E-03 | -1,48 | 7,49E-04 |
| 100380944 | Gm11602       | predicted gene 11602                                                                    | -1,53 | 8,32E-03 | -1,53 | 3,72E-03 |
| 22418     | Wnt5a         | wingless-related MMTV integration site 5A                                               | -1,53 | 2,51E-03 | -1,36 | 8,81E-03 |
| 54137     | Acrbp         | proacrosin binding protein                                                              | -1,53 | 1,36E-02 | -1,59 | 7,91E-03 |
| 227399    | Ppip5k2       | diphosphoinositol pentakisphosphate kinase 2                                            | -1,53 | 3,52E-03 | -1,54 | 4,23E-06 |
| 74319     | Mettl23       | methyltransferase like 23                                                               | -1,53 | 1,06E-03 | -1,55 | 9,59E-04 |
| 11689     | Alox5         | arachidonate 5-lipoxygenase                                                             | -1,53 | 3,16E-02 | -1,38 | 8,51E-02 |
| 67075     | Magt1         | magnesium transporter 1                                                                 | -1,53 | 1,21E-02 | -1,61 | 1,41E-02 |
| 52250     | Reep1         | receptor accessory protein 1                                                            | -1,53 | 4,58E-04 | -1,43 | 8,39E-03 |
| 18821     | Pln           | phospholamban                                                                           | -1,53 | 5,95E-03 | -1,57 | 1,05E-02 |
| 22417     | Wnt4          | wingless-related MMTV integration site 4                                                | -1,53 | 4,00E-02 | -1,40 | 3,62E-02 |
| 28169     | Agpat3        | 1-acylglycerol-3-phosphate O-acyltransferase 3                                          | -1,53 | 1,43E-03 | -1,39 | 3,30E-04 |
| 234725    | Zfp612        | zinc finger protein 612                                                                 | -1,53 | 5,90E-03 | -1,67 | 4,49E-02 |
| 12753     | Clock         | circadian locomotor output cycles kaput                                                 | -1,53 | 1,20E-02 | -1,57 | 1,18E-02 |
| 100040852 | Gm3002        | alpha-takusan pseudogene                                                                | -1,53 | 3,34E-02 | -1,52 | 4,15E-02 |
| 67484     | Eepd1         | endonuclease/exonuclease/phosphatase family domain containing 1                         | -1,54 | 3,86E-02 | -1,42 | 6,26E-02 |
| 18111     | Nnat          | neuronatin                                                                              | -1,54 | 1,16E-02 | -1,61 | 5,23E-03 |
| 26416     | Mapk14        | mitogen-activated protein kinase 14                                                     | -1,54 | 2,37E-04 | -1,44 | 6,69E-07 |
| 18767     | Pkia          | protein kinase inhibitor, alpha                                                         | -1,54 | 2,63E-02 | -1,51 | 4,69E-02 |
| 72759     | Tmem135       | transmembrane protein 135                                                               | -1,54 | 4,26E-04 | -1,31 | 1,88E-03 |
| 56690     | Mlycd         | malonyl-CoA decarboxylase                                                               | -1,54 | 1,29E-03 | -1,32 | 1,12E-04 |
| 109731    | Maob          | monoamine oxidase B                                                                     | -1,54 | 1,31E-03 | -1,65 | 3,37E-04 |
| 76261     | 0610040J01Rik | RIKEN cDNA 0610040J01 gene                                                              | -1,54 | 1,90E-02 | -1,39 | 5,06E-02 |
| 68895     | Ras11a        | RAS-like, family 11, member A                                                           | -1,55 | 1,75E-03 | -1,31 | 7,90E-02 |
| 56543     | Kcnd3         | potassium voltage-gated channel, Shal-related family, member 3                          | -1,55 | 2,66E-03 | -1,55 | 6,01E-03 |
| 68312     | Gstm7         | glutathione S-transferase, mu 7                                                         | -1,55 | 3,62E-04 | -1,44 | 1,02E-03 |
| 208618    | Etl4          | enhancer trap locus 4                                                                   | -1,55 | 4,43E-03 | -1,57 | 1,41E-03 |
| 78802     | Ttc30a1       | tetratricopeptide repeat domain 30A1                                                    | -1,55 | 1,58E-02 | -1,27 | 1,04E-01 |
| 240667    | Sec31b        | Sec31 homolog B (S. cerevisiae)                                                         | -1,55 | 1,64E-03 | -1,57 | 2,27E-03 |
| 66968     | Plin5         | perilipin 5                                                                             | -1,55 | 2,95E-03 | -1,50 | 2,30E-05 |
| 224893    | Zfp959        | zinc finger protein 959                                                                 | -1,55 | 1,06E-03 | -1,70 | 7,65E-04 |
| 23831     | Car14         | carbonic anhydrase 14                                                                   | -1,55 | 5,07E-04 | -1,46 | 1,02E-04 |
| 22190     | Ubc           | ubiquitin C                                                                             | -1,55 | 2,32E-04 | -1,42 | 4,58E-03 |
| 246049    | Slc36a2       | solute carrier family 36 (proton/amino acid symporter), member 2                        | -1,55 | 9,28E-05 | -1,31 | 4,21E-03 |
| 668917    | Zfp133-ps     | zinc finger protein 133, pseudogene                                                     | -1,55 | 1,87E-02 | -1,60 | 6,63E-03 |
| 229905    | Ccbl2         | cysteine conjugate-beta lyase 2                                                         | -1,55 | 4,00E-03 | -1,46 | 6,63E-03 |
| 56018     | Stard10       | START domain containing 10                                                              | -1,56 | 2,81E-04 | -1,38 | 2,85E-04 |
| 433752    | AA415398      | expressed sequence AA415398                                                             | -1,56 | 6,06E-03 | -1,82 | 1,53E-03 |
| 209584    | Tyw3          | tRNA-yW synthesizing protein 3 homolog (S. cerevisiae)                                  | -1,56 | 3,88E-02 | -1,59 | 2,38E-02 |
| 29867     | Cabp1         | calcium binding protein 1                                                               | -1,56 | 1,14E-02 | -1,41 | 2,27E-02 |
| 235636    | Rtp3          | receptor transporter protein 3                                                          | -1,56 | 1,11E-02 | -1,64 | 9,57E-03 |
| 70832     | 4921504A21Rik | RIKEN cDNA 4921504A21 gene                                                              | -1,56 | 4,21E-02 | -1,34 | 1,21E-01 |
| 11875     | Art5          | ADP-ribosyltransferase 5                                                                | -1,56 | 3,31E-03 | -1,69 | 6,43E-03 |
| 100502987 | Gm17066       | predicted gene 17066                                                                    | -1,57 | 3,64E-02 | -1,58 | 3,50E-02 |
| 68493     | Ndutf4        | NADH dehydrogenase (ubiquinone) 1 alpha subcomplex, assembly factor 4                   | -1,57 | 1,36E-03 | -1,47 | 7,33E-03 |
| 71916     | Dus4l         | dihydrouridine synthase 4-like (S. cerevisiae)                                          | -1,57 | 4,27E-02 | -1,26 | 1,53E-01 |
| 382073    | Ccdc84        | coiled-coil domain containing 84                                                        | -1,57 | 3,81E-04 | -1,55 | 2,44E-03 |

|               |               |                                                                                              |       |          |       |          |
|---------------|---------------|----------------------------------------------------------------------------------------------|-------|----------|-------|----------|
| 108767        | Pnrc1         | proline-rich nuclear receptor coactivator 1                                                  | -1,57 | 1,69E-04 | -1,19 | 1,88E-01 |
| 654318        | C530005A16Rik | RIKEN cDNA C530005A16 gene                                                                   | -1,57 | 1,80E-02 | -1,15 | 1,91E-01 |
| 16367         | Irs1          | insulin receptor substrate 1                                                                 | -1,58 | 5,76E-04 | -1,54 | 5,31E-03 |
| 100502933     | Gm19461       | predicted gene, 19461                                                                        | -1,58 | 1,24E-02 | -1,42 | 3,40E-02 |
| 226844        | Mfsd7b        | major facilitator superfamily domain containing 7B                                           | -1,58 | 1,23E-02 | -1,73 | 5,57E-03 |
| 100043102     | 4632428C04Rik | RIKEN cDNA 4632428C04 gene                                                                   | -1,58 | 5,54E-03 | -1,61 | 1,74E-02 |
| 103729        | AI450353      | expressed sequence AI450353                                                                  | -1,58 | 3,86E-02 | -1,60 | 3,83E-02 |
| 20167         | Rtn2          | reticulon 2 (Z-band associated protein)                                                      | -1,58 | 2,76E-03 | -1,46 | 1,90E-04 |
| 16776         | Lama5         | laminin, alpha 5                                                                             | -1,58 | 2,61E-03 | -1,61 | 4,54E-03 |
| 12790         | Cnga3         | cyclic nucleotide gated channel alpha 3                                                      | -1,58 | 2,55E-02 | -1,36 | 7,56E-02 |
| 233552        | Gdpd5         | glycerophosphodiester phosphodiesterase domain containing 5                                  | -1,59 | 2,32E-03 | -1,45 | 1,78E-03 |
| 109685        | Hyal3         | hyaluronoglucosaminidase 3                                                                   | -1,59 | 1,49E-03 | -1,74 | 5,72E-04 |
| 235497        | Leo1          | Leo1, Paf1/RNA polymerase II complex component, homolog (S. cerevisiae)                      | -1,59 | 1,51E-02 | -1,35 | 2,29E-02 |
| 320977        | A330023F24Rik | RIKEN cDNA A330023F24 gene                                                                   | -1,59 | 2,16E-02 | -1,50 | 6,17E-02 |
| 68867         | Rnf122        | ring finger protein 122                                                                      | -1,59 | 2,36E-03 | -1,51 | 5,18E-03 |
| 214579        | Aldh5a1       | aldehyde dehydrogenase family 5, subfamily A1                                                | -1,59 | 2,97E-03 | -1,35 | 2,19E-03 |
| 69149         | Kbtbd3        | kelch repeat and BTB (POZ) domain containing 3                                               | -1,59 | 8,77E-03 | -1,53 | 7,24E-03 |
| 238276        | Akap5         | A kinase (PRKA) anchor protein 5                                                             | -1,59 | 2,28E-02 | -1,37 | 7,55E-02 |
| 243382        | Ppm1k         | protein phosphatase 1K (PP2C domain containing)                                              | -1,59 | 7,18E-04 | -1,56 | 1,11E-04 |
| 269397        | Ss18l1        | synovial sarcoma translocation gene on chromosome 18-like 1                                  | -1,59 | 1,85E-03 | -1,47 | 5,72E-03 |
| 72324         | Plxdc1        | plexin domain containing 1                                                                   | -1,59 | 1,18E-02 | -1,57 | 2,18E-03 |
| 67564         | Tmem35        | transmembrane protein 35                                                                     | -1,60 | 2,92E-03 | -1,39 | 9,22E-02 |
| 16716         | Ky            | kyphoscoliosis peptidase                                                                     | -1,61 | 8,78E-03 | -1,24 | 8,10E-02 |
| 29815         | Bcar3         | breast cancer anti-estrogen resistance 3                                                     | -1,61 | 4,67E-04 | -1,55 | 4,15E-04 |
| 77015         | Mpped2        | metallophosphoesterase domain containing 2                                                   | -1,61 | 1,76E-04 | -1,39 | 8,95E-04 |
| 100502829     | Gm9899        | predicted gene 9899                                                                          | -1,62 | 4,65E-04 | -1,54 | 6,13E-03 |
| 21936         | Tnfrsf18      | tumor necrosis factor receptor superfamily, member 18                                        | -1,62 | 2,84E-02 | -1,70 | 1,75E-02 |
| 30878         | Apln          | apelin                                                                                       | -1,62 | 1,59E-02 | -1,44 | 1,46E-02 |
| 18619         | Penk          | preproenkephalin                                                                             | -1,63 | 8,97E-02 | -1,65 | 3,07E-02 |
| 73095         | Slc25a42      | solute carrier family 25, member 42                                                          | -1,63 | 1,98E-05 | -1,50 | 4,86E-04 |
| 60611         | Foxj2         | forkhead box J2                                                                              | -1,63 | 1,77E-04 | -1,61 | 3,31E-04 |
| 20183         | Rxrg          | retinoid X receptor gamma                                                                    | -1,63 | 2,22E-03 | -1,58 | 9,54E-05 |
| 17309         | Mgat3         | mannoside acetylglucosaminyltransferase 3                                                    | -1,63 | 2,48E-02 | -1,41 | 6,67E-02 |
| 75581         | Yipf7         | Yip1 domain family, member 7                                                                 | -1,63 | 5,53E-04 | -1,61 | 4,49E-03 |
| 791403        | D830015G02Rik | RIKEN cDNA D830015G02 gene                                                                   | -1,63 | 1,24E-03 | -1,24 | 3,49E-02 |
| 244886        | AI118078      | expressed sequence AI118078                                                                  | -1,63 | 1,11E-02 | -1,22 | 1,56E-01 |
| 76282         | Gpt           | glutamic pyruvic transaminase, soluble                                                       | -1,64 | 4,73E-04 | -1,41 | 6,96E-03 |
| 104103        | Aim           | antisense Igf2r RNA                                                                          | -1,64 | 4,87E-03 | -1,39 | 2,71E-02 |
| 76187         | Adhfe1        | alcohol dehydrogenase, iron containing, 1                                                    | -1,64 | 1,48E-04 | -1,55 | 1,62E-04 |
| 224598        | Zfp758        | zinc finger protein 758                                                                      | -1,64 | 1,55E-02 | -1,65 | 1,47E-02 |
| 320438        | Alg6          | asparagine-linked glycosylation 6 (alpha-1,3,-glucosyltransferase)                           | -1,64 | 1,90E-03 | -1,52 | 4,10E-04 |
| 280668        | Adam1a        | a disintegrin and metallopeptidase domain 1a                                                 | -1,65 | 8,06E-03 | -1,64 | 5,63E-03 |
| 100302730     | 5830417I10Rik | gon-4-like pseudogene                                                                        | -1,65 | 1,85E-05 | -1,57 | 4,26E-05 |
| 60345         | Nrip2         | nuclear receptor interacting protein 2                                                       | -1,65 | 1,11E-02 | -1,53 | 1,64E-02 |
| 11722         | Amy1          | amylase 1, salivary                                                                          | -1,65 | 1,05E-03 | -1,56 | 5,53E-03 |
| 12142         | Prdm1         | PR domain containing 1, with ZNF domain                                                      | -1,65 | 3,75E-04 | -1,69 | 2,19E-03 |
| 66211         | Rpl3l         | ribosomal protein L3-like                                                                    | -1,65 | 3,26E-05 | -1,54 | 1,06E-04 |
| 76263         | Gstk1         | glutathione S-transferase kappa 1                                                            | -1,65 | 1,17E-03 | -1,55 | 1,70E-04 |
| 18030         | Nfil3         | nuclear factor, interleukin 3, regulated                                                     | -1,66 | 1,16E-02 | -1,84 | 4,30E-03 |
| 70031         | Cmtm8         | CKLF-like MARVEL transmembrane domain containing 8                                           | -1,66 | 8,79E-03 | -1,76 | 6,81E-03 |
| 70772         | Ggnbp1        | gametogenetin binding protein 1                                                              | -1,67 | 2,14E-04 | -1,41 | 9,51E-03 |
| 258334        | Olfir1396     | olfactory receptor 1396                                                                      | -1,67 | 3,02E-02 | -1,68 | 1,33E-02 |
| 26912         | Gcat          | glycine C-acetyltransferase (2-amino-3-ketobutyrate-coenzyme A ligase)                       | -1,67 | 4,01E-03 | -1,82 | 2,66E-04 |
| 14711         | Gnmt          | glycine N-methyltransferase                                                                  | -1,68 | 1,08E-02 | -1,41 | 4,40E-02 |
| 320456        | B330016D10Rik | RIKEN cDNA B330016D10 gene                                                                   | -1,68 | 1,62E-03 | -1,38 | 5,50E-03 |
| 19682         | Rdh5          | retinol dehydrogenase 5                                                                      | -1,68 | 1,10E-03 | -1,74 | 1,79E-02 |
| 53945         | Slc40a1       | solute carrier family 40 (iron-regulated transporter), member 1                              | -1,69 | 2,10E-02 | -1,46 | 5,60E-02 |
| 117167        | Steap4        | STEAP family member 4                                                                        | -1,69 | 2,68E-03 | -1,67 | 3,76E-04 |
| 16508         | Kcnd2         | potassium voltage-gated channel, Shal-related family, member 2                               | -1,69 | 4,69E-02 | -1,49 | 1,55E-02 |
| 12292         | Cacna1s       | calcium channel, voltage-dependent, L type, alpha 1S subunit                                 | -1,69 | 8,10E-03 | -1,36 | 4,34E-03 |
| 208922        | Cpeb3         | cytoplasmic polyadenylation element binding protein 3                                        | -1,69 | 1,16E-04 | -1,60 | 1,28E-04 |
| 382864        | Colq          | collagen-like tail subunit (single strand of homotrimer) of asymmetric acetylcholinesterase  | -1,69 | 2,27E-02 | -1,14 | 2,32E-01 |
| 52570         | Ccdc69        | coiled-coil domain containing 69                                                             | -1,70 | 4,58E-04 | -1,73 | 1,12E-03 |
| 112422        | 2610305D13Rik | RIKEN cDNA 2610305D13 gene                                                                   | -1,70 | 3,61E-02 | -2,20 | 1,40E-02 |
| 210789        | Tbc1d4        | TBC1 domain family, member 4                                                                 | -1,70 | 2,77E-05 | -1,60 | 3,00E-06 |
| 108153        | Adams7        | a disintegrin-like and metallopeptidase (repolysin type) with thrombospondin type 1 motif, 7 | -1,70 | 1,30E-03 | -1,60 | 6,89E-04 |
| 171429.chr9.1 | Slc26a6       | solute carrier family 26, member 6                                                           | -1,70 | 4,02E-03 | -1,49 | 2,08E-03 |

|           |               |                                                                                   |       |          |       |          |
|-----------|---------------|-----------------------------------------------------------------------------------|-------|----------|-------|----------|
| 74770     | Hhat1         | hedgehog acyltransferase-like                                                     | -1,71 | 9,72E-05 | -1,50 | 2,88E-04 |
| 619597    | Gm6086        | predicted gene 6086                                                               | -1,71 | 8,18E-03 | -1,68 | 5,39E-03 |
| 319830    | 1500004A13Rik | RIKEN cDNA 1500004A13 gene                                                        | -1,72 | 9,17E-04 | -1,51 | 2,27E-03 |
| 213402    | Armc2         | armadillo repeat containing 2                                                     | -1,72 | 2,44E-03 | -1,66 | 3,43E-03 |
| 19716     | Bex1          | brain expressed gene 1                                                            | -1,72 | 3,27E-02 | -1,65 | 4,52E-02 |
| 71145     | Scara5        | scavenger receptor class A, member 5 (putative)                                   | -1,72 | 2,76E-04 | -1,62 | 1,24E-03 |
| 140483    | Hnmt          | histamine N-methyltransferase                                                     | -1,72 | 1,28E-02 | -1,45 | 4,12E-02 |
| 67442     | Retsat        | retinol saturase (all trans retinol 13,14 reductase)                              | -1,72 | 9,36E-04 | -1,66 | 4,91E-03 |
| 14585     | Gfra1         | glial cell line derived neurotrophic factor family receptor alpha 1               | -1,73 | 4,09E-03 | -1,47 | 1,58E-02 |
| 100043160 | Gm10012       | cytochrome c oxidase, subunit VIII pseudogene                                     | -1,73 | 4,91E-02 | -3,71 | 1,22E-02 |
| 13166     | Dbh           | dopamine beta hydroxylase                                                         | -1,74 | 8,68E-03 | -1,70 | 1,08E-02 |
| 16002     | Igf2          | insulin-like growth factor 2                                                      | -1,74 | 2,17E-02 | -1,34 | 1,17E-01 |
| 18639     | Pfkfb1        | 6-phosphofructo-2-kinase/fructose-2,6-biphosphatase 1                             | -1,74 | 3,94E-02 | -1,88 | 2,50E-03 |
| 12351     | Car4          | carbonic anhydrase 4                                                              | -1,74 | 4,93E-03 | -1,91 | 2,18E-03 |
| 330938    | Dixdc1        | DIX domain containing 1                                                           | -1,75 | 1,07E-02 | -1,75 | 1,84E-03 |
| 67419     | 3632451O06Rik | RIKEN cDNA 3632451O06 gene                                                        | -1,75 | 1,54E-03 | -2,05 | 9,08E-04 |
| 381218    | 4430402I18Rik | RIKEN cDNA 4430402I18 gene                                                        | -1,75 | 4,56E-03 | -1,73 | 3,70E-03 |
| 18606     | Enpp2         | ectonucleotide pyrophosphatase/phosphodiesterase 2                                | -1,75 | 4,40E-03 | -1,77 | 2,98E-02 |
| 330409    | Cecr2         | cat eye syndrome chromosome region, candidate 2                                   | -1,75 | 9,80E-03 | -1,68 | 1,18E-02 |
| 272428    | Acsm5         | acyl-CoA synthetase medium-chain family member 5                                  | -1,75 | 9,98E-03 | -1,37 | 9,11E-02 |
| 52538     | Acaa2         | acetyl-Coenzyme A acyltransferase 2 (mitochondrial 3-oxoacyl-Coenzyme A thiolase) | -1,75 | 2,10E-04 | -1,58 | 4,85E-06 |
| 380674    | Rdh18-ps      | retinol dehydrogenase 18, pseudogene                                              | -1,76 | 1,23E-02 | -2,25 | 2,24E-04 |
| 217830    | 9030617O03Rik | RIKEN cDNA 9030617O03 gene                                                        | -1,76 | 1,79E-04 | -1,64 | 2,17E-03 |
| 73326     | 4932702P03Rik | RIKEN cDNA 4932702P03 gene                                                        | -1,76 | 4,85E-03 | -1,33 | 3,41E-02 |
| 51798     | Ech1          | enoyl coenzyme A hydratase 1, peroxisomal                                         | -1,76 | 3,31E-04 | -1,73 | 5,42E-07 |
| 18712     | Pim1          | proviral integration site 1                                                       | -1,76 | 1,11E-03 | -1,46 | 7,09E-03 |
| 211429    | Pla2g4b       | phospholipase A2, group IVB (cytosolic)                                           | -1,77 | 3,19E-05 | -1,75 | 1,82E-04 |
| 329252    | Lgr6          | leucine-rich repeat-containing G protein-coupled receptor 6                       | -1,77 | 3,43E-03 | -1,66 | 2,93E-03 |
| 63953     | Dusp10        | dual specificity phosphatase 10                                                   | -1,77 | 4,85E-04 | -1,88 | 1,47E-03 |
| 54388     | Hils1         | histone H1-like protein in spermatids 1                                           | -1,78 | 8,25E-04 | -1,59 | 1,16E-02 |
| 11785     | Apbb1         | amyloid beta (A4) precursor protein-binding, family B, member 1                   | -1,78 | 1,19E-03 | -1,64 | 1,43E-05 |
| 100504714 | Gm16793       | predicted gene, 16793                                                             | -1,78 | 8,18E-03 | -1,56 | 5,66E-03 |
| 78910     | Asb15         | ankyrin repeat and SOCS box-containing 15                                         | -1,78 | 4,18E-05 | -1,67 | 1,20E-04 |
| 320844    | Amigo3        | adhesion molecule with Ig like domain 3                                           | -1,79 | 6,99E-04 | -1,50 | 1,44E-02 |
| 268859    | Rbfox1        | RNA binding protein, fox-1 homolog (C. elegans) 1                                 | -1,79 | 3,54E-03 | -1,66 | 1,05E-06 |
| 100271841 | Gm16119       | predicted gene 16119                                                              | -1,79 | 1,18E-02 | -1,34 | 8,35E-02 |
| 436022    | Dnaaf3        | dynein, axonemal assembly factor 3                                                | -1,79 | 1,28E-03 | -1,55 | 2,32E-04 |
| 380863    | Tmem171       | transmembrane protein 171                                                         | -1,81 | 9,38E-03 | -1,46 | 5,58E-02 |
| 235611    | Plxnb1        | plexin B1                                                                         | -1,81 | 8,44E-05 | -1,61 | 5,88E-06 |
| 52480     | D7ErtD715e    | DNA segment, Chr 7, ERATO Doi 715, expressed                                      | -1,81 | 2,92E-02 | -2,13 | 1,31E-02 |
| 14588     | Gfra4         | glial cell line derived neurotrophic factor family receptor alpha 4               | -1,82 | 7,30E-03 | -1,44 | 3,53E-02 |
| 11987     | Slc7a1        | solute carrier family 7 (cationic amino acid transporter, y+ system), member 1    | -1,82 | 4,34E-02 | -1,74 | 4,70E-02 |
| 216441    | Slc26a10      | solute carrier family 26, member 10                                               | -1,82 | 2,25E-03 | -1,56 | 4,41E-03 |
| 18823     | Plp1          | proteolipid protein (myelin) 1                                                    | -1,82 | 4,63E-02 | -1,92 | 4,53E-02 |
| 353169    | Slc2a12       | solute carrier family 2 (facilitated glucose transporter), member 12              | -1,82 | 3,00E-03 | -1,41 | 2,42E-02 |
| 18143     | Npas2         | neuronal PAS domain protein 2                                                     | -1,83 | 3,96E-03 | -1,83 | 9,13E-04 |
| 53422     | Ybx2          | Y box protein 2                                                                   | -1,83 | 1,81E-04 | -1,52 | 1,66E-03 |
| 11492     | Adam19        | a disintegrin and metallopeptidase domain 19 (meltrin beta)                       | -1,83 | 7,12E-03 | -1,67 | 2,46E-02 |
| 73010     | Gpr22         | G protein-coupled receptor 22                                                     | -1,83 | 5,21E-03 | -1,77 | 5,97E-03 |
| 69308     | 1700007P06Rik | RIKEN cDNA 1700007P06 gene                                                        | -1,83 | 2,28E-04 | -1,91 | 2,06E-05 |
| 68646     | Nadkd1        | NAD kinase domain containing 1                                                    | -1,84 | 1,00E-03 | -1,76 | 2,88E-03 |
| 319974    | Auts2         | autism susceptibility candidate 2                                                 | -1,84 | 1,35E-03 | -1,66 | 2,09E-03 |
| 192216    | Tmem47        | transmembrane protein 47                                                          | -1,84 | 2,23E-02 | -1,83 | 2,47E-02 |
| 68267     | Slc25a22      | solute carrier family 25 (mitochondrial carrier, glutamate), member 22            | -1,84 | 3,78E-03 | -1,80 | 3,03E-03 |
| 74591     | Abca12        | ATP-binding cassette, sub-family A (ABC1), member 12                              | -1,85 | 1,60E-03 | -1,85 | 1,60E-03 |
| 208777    | Sned1         | sushi, nidogen and EGF-like domains 1                                             | -1,87 | 2,29E-03 | -1,88 | 1,97E-03 |
| 54525     | Syt7          | synaptotagmin VII                                                                 | -1,87 | 5,55E-05 | -1,68 | 5,34E-05 |
| 319942    | A530016L24Rik | RIKEN cDNA A530016L24 gene                                                        | -1,88 | 6,51E-04 | -1,56 | 1,70E-04 |
| 73442     | Hspa12a       | heat shock protein 12A                                                            | -1,89 | 9,71E-04 | -1,63 | 5,75E-04 |
| 545276    | Gal3st3       | galactose-3-O-sulfotransferase 3                                                  | -1,90 | 1,07E-03 | -1,51 | 8,56E-03 |
| 21953     | Tnni2         | troponin I, skeletal, fast 2                                                      | -1,92 | 1,95E-02 | -1,90 | 1,98E-02 |
| 14955     | H19           | H19 fetal liver mRNA                                                              | -1,93 | 8,68E-03 | -1,65 | 6,33E-02 |
| 11832     | Aqp7          | aquaporin 7                                                                       | -1,93 | 1,05E-03 | -1,74 | 8,81E-04 |
| 19735     | Rgs2          | regulator of G-protein signaling 2                                                | -1,95 | 3,68E-03 | -2,20 | 2,57E-03 |
| 272381    | Lrrc4b        | leucine rich repeat containing 4B                                                 | -1,96 | 3,12E-03 | -1,34 | 2,21E-02 |
| 52882     | Rgs7bp        | regulator of G-protein signalling 7 binding protein                               | -1,96 | 3,88E-02 | -2,02 | 3,97E-02 |
| 108000    | Cenpf         | centromere protein F                                                              | -1,98 | 2,76E-04 | -2,14 | 6,31E-03 |
| 12125     | Bcl2l11       | BCL2-like 11 (apoptosis facilitator)                                              | -1,99 | 5,52E-04 | -1,94 | 6,82E-04 |



|           |               |                                                                                |       |          |       |          |
|-----------|---------------|--------------------------------------------------------------------------------|-------|----------|-------|----------|
| 243547    | Grip2         | glutamate receptor interacting protein 2                                       | -1,99 | 5,59E-05 | -1,66 | 3,99E-04 |
| 432720    | Akr1c19       | aldo-keto reductase family 1, member C19                                       | -2,00 | 1,63E-04 | -1,63 | 1,80E-03 |
| 12960     | Crybb1        | crystallin, beta B1                                                            | -2,00 | 1,12E-02 | -1,95 | 6,14E-03 |
| 12589     | Ift81         | intraflagellar transport 81                                                    | -2,00 | 3,48E-05 | -1,94 | 4,51E-05 |
| 171210    | Acot2         | acyl-CoA thioesterase 2                                                        | -2,01 | 6,12E-04 | -1,46 | 6,34E-05 |
| 53867     | Col5a3        | collagen, type V, alpha 3                                                      | -2,02 | 3,95E-02 | -1,72 | 2,09E-02 |
| 74492     | Kbtbd13       | kelch repeat and BTB (POZ) domain containing 13                                | -2,02 | 1,57E-03 | -1,76 | 7,66E-05 |
| 80978     | Mrgprh        | MAS-related GPR, member H                                                      | -2,02 | 3,54E-03 | -1,73 | 1,44E-03 |
| 208943    | Myo5c         | myosin VC                                                                      | -2,02 | 6,42E-04 | -2,09 | 2,16E-04 |
| 320736    | Vstm4         | V-set and transmembrane domain containing 4                                    | -2,03 | 3,27E-03 | -1,81 | 5,68E-03 |
| 57875     | Angptl4       | angiopoietin-like 4                                                            | -2,04 | 3,28E-02 | -2,15 | 3,17E-02 |
| 75216     | Cep128        | centrosomal protein 128                                                        | -2,05 | 1,90E-03 | -2,11 | 1,67E-05 |
| 329502    | Pla2g4e       | phospholipase A2, group IVE                                                    | -2,06 | 1,63E-03 | -1,66 | 2,57E-04 |
| 74931     | 4930481A15Rik | RIKEN cDNA 4930481A15 gene                                                     | -2,08 | 1,67E-02 | -1,86 | 2,90E-02 |
| 14120     | Fbp2          | fructose biphosphatase 2                                                       | -2,08 | 1,91E-05 | -1,86 | 3,19E-04 |
| 81840     | Sorcs2        | sortilin-related VPS10 domain containing receptor 2                            | -2,10 | 5,53E-04 | -1,95 | 9,43E-04 |
| 16420     | Itgb6         | integrin beta 6                                                                | -2,12 | 1,96E-03 | -1,77 | 1,20E-02 |
| 268319    | BC025920      | zinc finger protein pseudogene                                                 | -2,13 | 1,59E-02 | -2,16 | 9,97E-03 |
| 20292     | Ccl11         | chemokine (C-C motif) ligand 11                                                | -2,14 | 2,00E-02 | -2,24 | 2,91E-02 |
| 114663    | Impa2         | inositol (myo)-1(or 4)-monophosphatase 2                                       | -2,17 | 5,74E-04 | -1,61 | 1,28E-02 |
| 319953    | Ttll1         | tubulin tyrosine ligase-like 1                                                 | -2,18 | 6,21E-04 | -1,96 | 2,76E-04 |
| 100503040 | Gm19522       | predicted gene, 19522                                                          | -2,18 | 2,04E-02 | -2,15 | 2,18E-02 |
| 216616    | Efemp1        | epidermal growth factor-containing fibulin-like extracellular matrix protein 1 | -2,19 | 3,91E-03 | -2,04 | 5,16E-02 |
| 11548     | Adra1b        | adrenergic receptor, alpha 1b                                                  | -2,22 | 1,07E-03 | -1,79 | 2,90E-03 |
| 333182    | Cox6b2        | cytochrome c oxidase subunit VIb polypeptide 2                                 | -2,23 | 1,29E-02 | -1,51 | 1,15E-01 |
| 18546     | Pcp4          | Purkinje cell protein 4                                                        | -2,25 | 2,49E-02 | -2,12 | 1,58E-02 |
| 16467     | Atcay         | ataxia, cerebellar, Cayman type homolog (human)                                | -2,27 | 3,88E-03 | -2,35 | 3,19E-03 |
| 231646    | Myo1h         | myosin 1H                                                                      | -2,28 | 2,73E-02 | -1,01 | 9,33E-01 |
| 12477     | Ctla4         | cytotoxic T-lymphocyte-associated protein 4                                    | -2,33 | 2,70E-02 | -2,29 | 4,90E-02 |
| 20519     | Slc22a3       | solute carrier family 22 (organic cation transporter), member 3                | -2,35 | 2,62E-03 | -1,59 | 1,83E-02 |
| 17380     | Mme           | membrane metallo endopeptidase                                                 | -2,37 | 7,89E-04 | -2,10 | 3,23E-03 |
| 73750     | Whrn          | whirlin                                                                        | -2,41 | 3,69E-04 | -1,91 | 1,91E-04 |
| 16372     | Irx2          | Iroquois related homeobox 2 (Drosophila)                                       | -2,46 | 5,56E-03 | -1,98 | 3,69E-04 |
| 233813    | Vwa3a         | von Willebrand factor A domain containing 3A                                   | -2,49 | 6,48E-03 | -2,19 | 1,49E-02 |
| 623312    | Gm6416        | predicted gene 6416                                                            | -2,49 | 9,58E-04 | -2,56 | 8,97E-04 |
| 74356     | 4931428F04Rik | RIKEN cDNA 4931428F04 gene                                                     | -2,56 | 7,14E-05 | -2,29 | 1,21E-02 |
| 20503     | Slc16a7       | solute carrier family 16 (monocarboxylic acid transporters), member 7          | -2,61 | 2,07E-03 | -2,69 | 1,93E-03 |
| 12723     | Clcn1         | chloride channel 1                                                             | -2,65 | 4,10E-04 | -2,21 | 1,16E-03 |
| 13838     | Epha4         | Eph receptor A4                                                                | -2,68 | 1,13E-03 | -2,34 | 2,76E-03 |
| 73990     | 4930455C13Rik | RIKEN cDNA 4930455C13 gene                                                     | -2,71 | 4,68E-02 | 1,04  | 7,13E-01 |
| 71699     | Slc41a3       | solute carrier family 41, member 3                                             | -2,75 | 1,35E-02 | -1,90 | 2,14E-02 |
| 216188    | Aldh112       | aldehyde dehydrogenase 1 family, member L2                                     | -2,82 | 1,67E-03 | -2,94 | 6,48E-04 |
| 65079     | Rtn4r         | reticulon 4 receptor                                                           | -2,93 | 3,39E-02 | -2,20 | 5,21E-02 |
| 381836    | Sbk2          | SH3-binding domain kinase family, member 2                                     | -3,09 | 1,32E-04 | -3,03 | 1,42E-04 |
| 237403    | Lingo3        | leucine rich repeat and Ig domain containing 3                                 | -3,16 | 3,71E-03 | -2,18 | 2,51E-03 |
| 104158    | Ces1d         | carboxylesterase 1D                                                            | -3,19 | 9,63E-04 | -2,99 | 7,58E-06 |
| 108995    | Tbc1d10c      | TBC1 domain family, member 10c                                                 | -3,19 | 1,97E-03 | -2,80 | 5,87E-04 |
| 230163    | Aldob         | aldolase B, fructose-bisphosphate                                              | -3,20 | 4,34E-04 | -2,51 | 1,61E-03 |
| 102566    | Ano10         | anoctamin 10                                                                   | -3,26 | 3,42E-05 | -3,53 | 8,63E-04 |
| 57262     | Retnla        | resistin like alpha                                                            | -3,26 | 2,37E-04 | -2,03 | 5,47E-02 |
| 100038575 | Gm10635       | predicted gene 10635                                                           | -3,43 | 2,25E-03 | -3,46 | 2,66E-03 |
| 16855     | Lgals4        | lectin, galactose binding, soluble 4                                           | -3,51 | 2,57E-04 | -3,10 | 1,09E-04 |
| 381835    | Gm1078        | predicted gene 1078                                                            | -3,70 | 2,25E-03 | -3,35 | 2,08E-05 |
| 240595    | Kcnv2         | potassium channel, subfamily V, member 2                                       | -3,72 | 2,67E-04 | -3,20 | 2,35E-04 |
| 100689    | Spon2         | spondin 2, extracellular matrix protein                                        | -3,73 | 1,24E-02 | -3,30 | 1,24E-02 |
| 11865     | Arntl         | aryl hydrocarbon receptor nuclear translocator-like                            | -5,19 | 1,09E-02 | -4,20 | 2,45E-02 |
| 26897     | Acot1         | acyl-CoA thioesterase 1                                                        | -6,44 | 9,57E-04 | -3,56 | 1,82E-05 |
